# 1 Upper Respiratory Tract Resistome exhibits SARS-CoV-2 specific 2 antimicrobial resistance patterns

3

4 Authors: Siddharth Singh Tomar<sup>1,2</sup> & Krishna Khairnar<sup>1,2\*</sup>

5 Author Affiliation: <sup>1</sup>Environmental Epidemiology and Pandemic Management (EE&PM), Council  
6 of Scientific and Industrial Research-National Environmental Engineering Research Institute  
7 (CSIR-NEERI), Nagpur, India.

8 &

9 <sup>2</sup> Academy of Scientific and Innovative Research (AcSIR), Ghaziabad, UP, India.

10 \*Corresponding author: Correspondence to Krishna Khairnar

11 e-mail: [k\\_khairnar@neeri.res.in](mailto:k_khairnar@neeri.res.in), [kskhairnar@gmail.com](mailto:kskhairnar@gmail.com)

12

13

## Abstract

14 The COVID-19 pandemic has raised concerns about antimicrobial resistance (AMR), especially  
15 in the context of secondary bacterial infections. This study investigates the impact of SARS-  
16 CoV-2 infection on the resistome of the upper respiratory tract (URT) using a metagenomic  
17 next-generation sequencing (mNGS) approach. Samples from 48 SARS-CoV-2-infected  
18 individuals and 47 healthy individuals from Central India were analyzed to assess variations in  
19 AMR gene profiles. Our results revealed significant differences in AMR gene diversity and  
20 abundance between the two groups. SARS-CoV-2 samples exhibited greater alpha diversity  
21 (Chao1 index) and higher variability, as evidenced by PCA and PCoA analyses, which showed  
22 distinct clustering. Additionally, 24 AMR gene families were significantly more abundant in the  
23 SARS-CoV-2 group. These gene families conferred resistance against 20 different drug classes,  
24 including macrolides, beta-lactams, and aminoglycosides. Notably, AMR genes linked to  
25 ESKAPE pathogens were more prevalent in the SARS-CoV-2 group. These findings highlight  
26 the potential role of SARS-CoV-2 in driving changes in the URT resistome, with implications for  
27 managing secondary infections and guiding antibiotic stewardship in future pandemics.

28

29 **Keywords:** SARS-CoV-2, antimicrobial resistance, resistome, upper respiratory tract,  
30 metagenomics, ESKAPE pathogens, antibiotic resistance.

31

32

33

## 1        **1. Introduction**

2

3        The global pandemic caused by SARS-CoV-2 has prompted extensive research on its effects  
4        beyond the immediate viral infection, particularly in the context of microbial communities and  
5        their resistomes. Understanding the resistome is crucial in understanding the broader  
6        implications of infections like COVID-19. This study focuses on the upper respiratory tract (URT)  
7        resistome and its alterations specific to SARS-CoV-2. As the URT is the primary entry point for  
8        the virus, the virus predisposes in the URT before subsequent lower respiratory tract infection,  
9        making URT an important site for exploring potential changes in antimicrobial resistance  
10        patterns among the SARS-CoV-2 infected individuals.

11        The URT harbors a diverse microbiome, including bacteria, fungi, and viruses; studies show that  
12        disruptions in the microbiome can lead to dysbiosis, creating an environment conducive to the  
13        selection and spread of AMR genes <sup>1,2,3</sup>. Several studies have demonstrated that viral  
14        infections, including those caused by influenza and other respiratory viruses, can alter microbial  
15        diversity in the respiratory tract. For example, Hanada et al. (2018) showed that Respiratory  
16        viral infections like influenza could disrupt host microbial communities and host defense,  
17        contributing to the pathogenesis of secondary bacterial infections <sup>4</sup>. Similarly, Tan et al. (2020)  
18        demonstrated that viral infections could induce changes in the microbiota that favor the  
19        selection of pathogenic bacteria capable of acquiring resistance <sup>5</sup>.

20        AMR in the URT was a growing concern due to widespread antibiotic use in treating respiratory  
21        infections even before the COVID-19 pandemic. It was observed that antibiotic treatment can  
22        disrupt the natural balance of microbial communities, leading to the proliferation of resistant  
23        organisms <sup>6</sup>. Research has shown that the resistomes can serve as a reservoir for resistance  
24        factors, which could be transferred to pathogenic bacteria through horizontal gene transfer <sup>7</sup>.

25        Since the onset of the COVID-19 pandemic, researchers have explored how SARS-CoV-2  
26        infection impacts microbial communities and resistance patterns <sup>8</sup>. A review by Sender &  
27        Hentrich (2021) highlighted the influence of COVID-19 on the microbiome, noting that the virus-  
28        induced inflammation and immune suppression may promote bacterial growth and AMR  
29        development <sup>9</sup>. Furthermore, high rates of antibiotic use in COVID-19 patients have raised  
30        concerns about further promoting resistance. A World Health Organisation (WHO) statement  
31        noted that although bacterial co-infections in COVID-19 patients were relatively uncommon

1 (only 8%), antibiotics were widely prescribed, likely contributing to increasing AMR among  
2 affected populations <sup>10</sup>.

3 Studies investigating the URT microbiome in COVID-19 patients have shown significant  
4 changes in microbial composition. Fazel et al. (2023) reported a reduction in bacterial diversity  
5 in SARS-CoV-2-infected individuals, with an increased abundance of opportunistic pathogens  
6 such as *Staphylococcus aureus* and *Pseudomonas aeruginosa*, both of which are known for  
7 their ability to acquire resistance against commonly used antibiotics<sup>11</sup>. A comprehensive review  
8 by Rehman (2023) concluded that the AMR genes such as *blaKPC*, *blaNDM*, *blaOXA-48*  
9 (carbapenem resistance), *mecA* (methicillin resistance), and *blaCTX-M*, *blaTEM*, *blaSHV* (ESBL  
10 production) are consistently being reported in the studies involving COVID-19 patients. These  
11 ARGs are responsible for resistance to pathogens like *Klebsiella pneumoniae*, *Acinetobacter*  
12 *baumannii*, *Staphylococcus aureus*, and *E. coli*.<sup>12</sup>.

13 Despite the growing evidence linking SARS-CoV-2 to changes in the resistome, more research  
14 is needed to understand these interactions fully. Studies using metagenomic sequencing to  
15 profile the resistome are powerful tools for identifying AMR gene profile variations during  
16 COVID-19 infection<sup>13</sup>. The relationship between SARS-CoV-2 and the resistome has  
17 implications not only for COVID-19 treatment but also for broader pandemic preparedness.  
18 Understanding how viral infections influence AMR patterns will be critical for managing future  
19 outbreaks, as co-infections with resistant bacteria could complicate treatment strategies and  
20 worsen patient outcomes.

21 The literature review also highlights the lack of studies investigating the relationship between  
22 COVID-19 disease and changes in upper respiratory tract resistome in the Indian context. There  
23 is a comprehensive study by Nath et al. (2023) in which the authors have metagenomically  
24 investigated the changes in URT microbiome in SARS-CoV-2 infected individuals to ascertain  
25 the infection-specific signatures that may be used for developing nasal prebiotic therapies<sup>14</sup>.  
26 However, the authors have not investigated the paradigm of AMR alterations among the URT of  
27 SARS-CoV-2 patients.

28 Overall, while current research indicates that SARS-CoV-2 infection may influence microbial  
29 diversity and AMR patterns in the URT, the specific changes in the URT resistome of COVID-19  
30 patients remain underexplored, particularly in the Indian population. This study aims to fill this  
31 gap by using a whole genome metagenomic approach to characterize the URT AMR gene

1 profiles within the context of SARS-CoV-2 infection. Understanding these changes could  
2 enhance the clinical management of secondary infections in COVID-19 and inform antibiotic  
3 stewardship strategies for future pandemics.

## 4 **2. Materials and methods**

### 5 **2.1. Study Population**

6 The samples used in the study were collected during March-April 2023. The study population  
7 belongs to the Vidarbha region of Central India, with samples collected from participants across  
8 five districts: Nagpur, Wardha, Gadchiroli, Chandrapur, and Bhandara. For the SARS-CoV-2  
9 Negative Group (Control), the median age (interquartile range [IQR]) is 29 years (22 to 37 ). For  
10 the SARS-CoV-2 Positive Group, the median age (IQR) is 36 years (19 to 67). Participants from  
11 the SARS-CoV-2 group presented with severe acute respiratory infection (SARI) and/or  
12 influenza-like illness (ILI) symptoms. While the participants from the control group were  
13 asymptomatic and RTPCR negative.

14

### 15 **2.2. Sample Collection and processing**

16 In total, 96 URT swab samples in Viral Transport Medium (VTM) were collected for this study,  
17 out of which 48 were from SARS-CoV-2 positive patients (SARS-CoV-2 group) and 48 samples  
18 were collected from Healthy control (RTPCR negative). These samples were collected by expert  
19 healthcare professionals while following the standard sample collection guidelines. The  
20 collected samples were maintained at  $4\text{ }^{\circ}\text{C} \leq 5$  days (Short-term storage) and at  $-80\text{ }^{\circ}\text{C}$  for the  
21 long term. Aliquots of these collected samples were then processed for SARS-CoV-2 RTPCR  
22 testing under Biosafety level-II conditions. Samples with  $\leq 25$  cycle threshold value of SARS-  
23 CoV-2 target genes were considered as positive samples.

24

### 25 **2.3. DNA Extraction, Library Preparation, and Metagenomic Sequencing**

26 DNA extraction was performed using the QIAamp DNA Microbiome Kit (Catalog No. 51704)  
27 according to the manufacturer's protocol. Following extraction, the DNA concentration was  
28 assessed with a Qubit fluorometer (ng/ $\mu\text{L}$ ), and purity was evaluated using a Nanodrop  
29 spectrophotometer (A260/280 and A260/230 ratios). Library preparation was conducted using

1 the QIAseq FX DNA Library Preparation Kit<sup>15</sup>. Metagenomic next-generation sequencing  
2 (mNGS) was performed on the NextSeq550 platform using a 2x150 bp high-output kit, providing  
3 paired-end reads across 300 cycles.

4

5

#### 6 **2.4. Metagenomic Data Analysis**

7 Metagenomic data analysis was conducted using the Chan Zuckerberg ID (CZID) web-based  
8 platform. The initial Sequencing quality control involved removing External RNA Controls  
9 Consortium (ERCC) sequences with Bowtie2 Version 2.5.4<sup>16</sup> and filtering out sequencing  
10 adapters, short reads, low-quality sequences, and low-complexity regions using a customized  
11 version of fastp<sup>17</sup>. Specifically, bases with quality scores below 17, reads shorter than 35 base  
12 pairs (bp), low-complexity sequences exceeding 40%, and sequences with more than 15  
13 undetermined bases (Ns) were excluded.

14

15 Human sequences were filtered out through alignments with Bowtie2 and HISAT2<sup>18</sup> against  
16 reference human genomes. For sequences 100% identical for the first 70 bp, only one  
17 representative read was retained using CZID-dedup. The Spliced Transcripts Alignment to a  
18 Reference (STAR) algorithm<sup>19</sup> was also employed to remove duplicate, low-quality, and low-  
19 complexity host reads. The remaining non-human reads were aligned to the NCBI nucleotide  
20 and protein databases (NCBI Index Date: 06-02-2024) using GSNAPL and RAPSearch. After  
21 host read filtering, the remaining sequences were aligned to the NCBI nucleotide (NT) database  
22 with Minimap2<sup>20</sup> and the NCBI protein (NR) database with Diamond<sup>21</sup>. The hits from these  
23 alignments were annotated with corresponding accession numbers, and taxon counts were  
24 generated by combining results from GSNAP and RAPSearch.

25

26 Reads were de novo assembled into longer contigs using SPADES. Bowtie2 was then used to  
27 map original reads back to these contigs, restoring the link between reads and contigs. BLAST  
28 analysis was subsequently performed on the contigs against the NT-BLAST database (GSNAP)  
29 and the NR database (RAPSearch2).

30

#### 31 **2.5. AMR pipeline**

32 CZID's AMR Pipeline v1.4.2<sup>22</sup> was used for AMR analysis. AMR gene detection is performed  
33 using the Resistance Gene Identifier (RGI) tool, which aligns reads to the Comprehensive  
34 Antibiotic Resistance Database (CARD) v3.2.6<sup>23</sup> to identify AMR genes and pathogen species

1 are determined based on these matches. Contigs are assembled using SPAdes and aligned  
2 with CARD via BLAST for further species identification. The results are reported, including  
3 detailed information on AMR genes (such as gene family and resistance mechanism), quality  
4 control metrics (e.g., the number of reads or contigs matching an AMR gene, average identity,  
5 and coverage), and pathogen-of-origin determination. Outputs from CZID's AMR Pipeline  
6 include the AMR sample report, quality-filtered reads, and contig sequences, along with raw or  
7 intermediate files for further analysis.

8

## 9 **2.6. Statistical Analysis and Visualisation**

10 Statistical tests and visualization of results were performed using Python 3.10.12. The analysis  
11 utilized several packages, including scipy (version 1.13.1) for t-tests and ANOVA. statsmodels  
12 (version 0.14.4) for regression models and hypothesis testing. scikit-learn (version 1.5.2) was  
13 used for PCA, PCoA, Multiple regression and additional statistical analysis. For data  
14 visualization, matplotlib (version 3.7.1) was employed, while seaborn (version 0.13.2) was used  
15 for statistical visualizations with heatmaps and violin plots. Interactive visualizations like the  
16 Sankey diagram were created using Plotly (version 5.24.1), and Data transformation tasks such  
17 as pivoting and log transformation were handled with Pandas (version 2.2.2). Basic statistical  
18 calculations were performed using numpy (version 1.26.4). The abundance metric of reads per  
19 million (RPM) was used for statistical analysis and data visualisation to normalize variations in  
20 sequencing depth across different samples.

21

22

23

24

25

26

27

28

29

30

31

32

33

34

1  
2  
3  
4  
5  
6  
7  
8  
9  
10  
11  
12  
13  
14  
15  
16  
17  
18  
19  
20  
21  
22  
23  
24  
25  
26  
27  
28  
29  
30  
31  
32  
33

### **3. Results**

#### **3.1. Summary of Sequencing Results**

The SARS-CoV-2 and Control groups were subjected to metagenomic next-generation sequencing using the Illumina NextSeq550 platform. The SARS-CoV-2 sample set consists of 48 samples, with an average of  $7.26 \pm 1.52$  million reads generated per sample. After applying Human filters (host read filters) to remove host reads, an average of  $1.78 \pm 0.56$  million reads (25%) passed the filters. However, the control sample set consists of 47 samples, as one sample failed the quality check before sequencing, so that sample was not included in further analysis. The control group comprises 47 samples, generating an average of  $6.52 \pm 3.47$  million reads. After applying human filters (host read filters), an average of  $0.78 \pm 0.37$  million reads (15%) passed the filters, reflecting a considerable reduction in microbial reads post-filtering in the control data set.

#### **3.2. Comparison of AMR Gene Alpha Diversity between SARS-CoV-2 and Control Groups**

The alpha diversity analysis revealed differences in species richness between the Control and SARS-CoV-2 groups. The Chao1 index was notably higher in the SARS-CoV-2 group for  $p < 0.05$  (Stat = 841.00,  $p = 0.0327$ ), indicating a broader diversity of antimicrobial resistance (AMR) genes in this group. However, the Shannon index, which accounts for both richness and evenness, showed no significant difference in alpha diversity between the groups (Stat = 1174.00,  $p = 0.735$ ). Similarly, the Simpson index did not differ significantly (Stat = 1262.00,  $p = 0.325$ ), suggesting that while the SARS-CoV-2 group exhibited higher species richness, the evenness of the distribution of AMR genes remained comparable to the Control group. **(Figure 1)**

#### **3.3. PCA and PCoA Reveal Distinct Variability Between SARS-CoV-2 and Control Groups**



1 PCA and PCoA analyses used the distance matrix the Bray-Curtis distance method generated  
2 to examine the variance and separation between SARS-CoV-2 and control groups. The first two  
3 components in the PCA explained 60.79% and 20.88% of the variance, respectively. The  
4 SARS-CoV-2 samples exhibited greater spread, indicating higher variability, while the control  
5 samples were more tightly clustered near zero, suggesting lower variance (**Figure 2**). Similarly,  
6 PCoA revealed distinct clustering, with PCoA Component 1 and Component 2 accounting for  
7 34.50% and 15.63% of the variance (**Figure 2**). PCA and PCoA showed significant differences  
8 between the two groups, with SARS-CoV-2 samples displaying more variability and distinct  
9 characteristics than the controls.

10

### 11 **3.4. Bray-Curtis Dissimilarity Analysis**

12 The Bray-Curtis dissimilarity heatmap (**Figure 3**) highlights the compositional differences  
13 between the SARS-CoV-2 samples (Sample IDs in red) and control samples (Sample IDs in  
14 blue) based on AMR gene profiles. The heatmap shows distinct clustering patterns, with SARS-  
15 CoV-2 samples exhibiting higher internal diversity (alpha diversity), as seen by the broader  
16 range of red shades. Meanwhile, control samples display more uniform blue clustering,  
17 indicating comparatively significant similarity within the group. The overall higher dissimilarity  
18 between the two groups (beta diversity) shows substantial differences in AMR gene profiles,  
19 aligning with the trends observed in the PCA and PCoA analyses.

20

### 21 **3.5. Variations in AMR Gene Abundance Between SARS-CoV-2 and Control Groups**

22 The Shapiro-Wilk test is used to assess whether the datasets follow a normal distribution. The  
23 results of the Shapiro-Wilk test show extremely low p-values,  $4.87 \times 10^{-111}$  and  $2.70 \times 10^{-93}$ , for the  
24 Control and SARS-CoV-2 groups, respectively. For Shapiro-Wilk test ( $p > 0.05$ ) indicates normal  
25 distribution. (**Figure 4**) As the data was not normally distributed, a non-parametric test such as  
26 the Mann-Whitney was used instead of ANOVA. A total of 203 AMR gene families were  
27 analyzed; the Mann-Whitney ( $p < 0.05$ ) indicated that the aggregated abundances of these  
28 certain gene families varied significantly between the two groups. However, when the thresholds  
29 for log<sub>2</sub> fold change of  $\pm 1$  along with  $p < 0.05$  (Mann-Whitney) were used to visualise the  
30 relative change in average abundance of the AMR gene between two conditions (e.g., SARS-  
31 CoV-2 versus control), out of 24 genes passing the thresholds 23 AMR genes showed higher  
32 abundances in SARS-CoV-2 group, and one gene (Isa-type ABC-F protein) was more abundant  
33 in Control Group. **Table 1** Genes with a log<sub>2</sub> fold change  $> 1$  or  $< -1$  and a p-value below 0.05  
34 (above the dashed line) were marked in red. (**Figure 5**)



| AMR Gene Family                                                                                                              | log <sub>2</sub> FC | P value | Control Aggregated Abundance | SARS-CoV-2 Aggregated Abundance | Sample Group with higher Abundance |
|------------------------------------------------------------------------------------------------------------------------------|---------------------|---------|------------------------------|---------------------------------|------------------------------------|
| TEM beta-lactamase                                                                                                           | 3.78                | 0.0001  | 328.95                       | 4557.86                         | SARS-CoV-2                         |
| rifamycin-resistant beta-subunit of RNA polymerase (rpoB)                                                                    | 2.40                | 0.0001  | 303.66                       | 1613.45                         | SARS-CoV-2                         |
| resistance-nodulation-cell division (RND) antibiotic efflux pump                                                             | 1.91                | 0.0001  | 81.04                        | 307.56                          | SARS-CoV-2                         |
| major facilitator superfamily (MFS) antibiotic efflux pump; resistance-nodulation-cell division (RND) antibiotic efflux pump | 2.34                | 0.0001  | 3.77                         | 23.23                           | SARS-CoV-2                         |
| major facilitator superfamily (MFS) antibiotic efflux pump                                                                   | 3.32                | 0.0001  | 88.76                        | 895.84                          | SARS-CoV-2                         |
| ATP-binding cassette (ABC) antibiotic efflux pump; major facilitator superfamily (MFS) antibiotic efflux pump                | 6.74                | 0.0021  | 0.42                         | 150.93                          | SARS-CoV-2                         |
| AAC(3)                                                                                                                       | 5.87                | 0.0031  | 2.94                         | 229.76                          | SARS-CoV-2                         |
| APH(6)                                                                                                                       | 2.88                | 0.0091  | 158.33                       | 1176.23                         | SARS-CoV-2                         |
| pmr phosphoethanolamine transferase                                                                                          | 3.07                | 0.0101  | 6.56                         | 62.86                           | SARS-CoV-2                         |
| kdpDE                                                                                                                        | 8.56                | 0.0111  | 1.00                         | 757.01                          | SARS-CoV-2                         |
| chloramphenicol acetyltransferase (CAT)                                                                                      | 1.86                | 0.0121  | 22.92                        | 86.08                           | SARS-CoV-2                         |
| fosfomycin thiol transferase                                                                                                 | 6.02                | 0.0131  | 0.78                         | 115.19                          | SARS-CoV-2                         |
| ANT(4')                                                                                                                      | 2.48                | 0.0141  | 0.22                         | 5.83                            | SARS-CoV-2                         |
| tetracycline inactivation enzyme                                                                                             | 2.84                | 0.0151  | 3.35                         | 30.18                           | SARS-CoV-2                         |
| quinolone resistance protein (qnr)                                                                                           | 2.65                | 0.0151  | 0.67                         | 9.48                            | SARS-CoV-2                         |
| ANT(2'')                                                                                                                     | 2.39                | 0.0201  | 85.68                        | 455.26                          | SARS-CoV-2                         |
| ANT(3'')                                                                                                                     | 4.68                | 0.0221  | 2.43                         | 87.09                           | SARS-CoV-2                         |
| multidrug and toxic compound extrusion (MATE) transporter                                                                    | 5.79                | 0.0251  | 5.07                         | 336.15                          | SARS-CoV-2                         |
| trimethoprim resistant dihydrofolate reductase dfr                                                                           | 3.53                | 0.0251  | 19.46                        | 236.34                          | SARS-CoV-2                         |
| APH(3'')                                                                                                                     | 2.73                | 0.0271  | 195.22                       | 1304.21                         | SARS-CoV-2                         |
| antibiotic-resistant isoleucyl-tRNA synthetase (ileS)                                                                        | 2.75                | 0.0281  | 68.53                        | 469.04                          | SARS-CoV-2                         |
| vga-type ABC-F protein                                                                                                       | 2.23                | 0.0301  | 1.14                         | 9.08                            | SARS-CoV-2                         |
| undecaprenyl pyrophosphate related proteins                                                                                  | 2.13                | 0.0301  | 0.59                         | 5.96                            | SARS-CoV-2                         |
| Isa-type ABC-F protein                                                                                                       | -1.49               | 0.0441  | 954.94                       | 338.00                          | Control                            |

1  
2 **Table 1:** Overview of AMR gene families with notable abundance differences between SARS-CoV-2 and  
3 control samples. Each entry includes the AMR gene family, log<sub>2</sub> fold change (logFC), p-value (Mann-  
4 Whitney), aggregated abundances in both SARS-CoV-2 and Control groups and the sample group in  
5 which the gene is more abundant. Genes with logFC > 1 and p-value < 0.05 are considered significantly  
6 more abundant in SARS-CoV-2, while genes with logFC < -1 and p-value < 0.05 are considerably more  
7 abundant in controls.

8  
9 Gene families with a p-value < 0.05 (Mann-Whitney) were selected for further analysis and used  
10 to generate comparative abundance heatmaps (**Figure 6**). The abundance values were log-

1 transformed (natural log) for proper visualization. The heatmaps reveal distinct AMR gene family  
2 distribution patterns, with the SARS-CoV-2 group showing a higher abundance of several AMR  
3 gene families, such as 16S rRNA methyltransferases (rmtC), ADC beta-lactamases, and  
4 General Bacterial Porins. The control group showed a lower abundance of these gene families.  
5 Some gene families, such as the MFS antibiotic efflux pump, exhibited overall moderate  
6 abundance in both groups but were still higher in the SARS-CoV-2 group.

7

8 Violin plots were used to visualize further the difference in abundance and distribution of  
9 significantly varying AMR gene families (**Figure 7**). The SARS-CoV-2 group demonstrated  
10 higher abundances of AMR gene families such as non-erm 23S ribosomal RNA  
11 methyltransferase (G748), vga-type ABCF protein, ANT(2''), and APH(3') and APH(6)  
12 aminoglycoside resistance genes. Also, the MFS antibiotic efflux pump and TEM beta-  
13 lactamase genes were more prominent in the SARS-CoV-2 group.

14

15 When the significant AMR Gene families were further analysed for the corresponding drug class  
16 to which they may confer resistance, it was observed that these gene families were conferring  
17 resistance against the following 20 distinct drug classes, including macrolides, streptogramin,  
18 lincosamide, aminocoumarin, fluoroquinolone, tetracycline, peptide antibiotic, nitroimidazole,  
19 rifamycin, beta-lactams, pleuromutilin, aminoglycoside, disinfecting agents and antiseptics,  
20 sulfonamide, phenicol, diaminopyrimidine, nitrofurantoin, glycopeptides and phosphonic acid  
21 antibiotics.

22

### 23 **3.6. Evaluation of Factors Influencing AMR Gene Abundance Using Poisson and Zero-** 24 **Inflated Poisson Models**

25 The abundance data for AMR genes was positively skewed with multiple zero values.  
26 Therefore, both Poisson regression and Zero-Inflated Poisson (ZIP) regression models were  
27 used to account for this distribution. RPM values below one were filtered out before executing  
28 the models to normalize the data and reduce noise from low-abundance observations. The  
29 Poisson model demonstrated a strong fit, with a high Pseudo R-squared of 0.9976, indicating it  
30 explained nearly all variance in AMR abundance. In contrast, the ZIP model, intended to handle  
31 excess zeros, produced a much lower Pseudo R-squared of 0.04787, with a non-significant  
32 zero-inflation component, suggesting that zero inflation did not enhance model performance for  
33 this dataset. In terms of variable effects, Sample\_Type (SARS-CoV-2 vs. control) had a positive

1 and highly significant association with AMR abundance (coef = 0.2697,  $p < 0.001$ ), indicating  
 2 that AMR gene abundance is notably higher in the SARS-CoV-2 group. Collection\_location  
 3 showed a negative and significant association with AMR abundance (coef = -0.1619,  $p < 0.001$ ),  
 4 indicating that AMR gene presence varies by geographic location, with certain areas having  
 5 lower levels. Host\_sex was also significantly associated with the abundance of AMR genes, with  
 6 a negative coefficient (coef = -0.527,  $p < 0.001$ ), suggesting males have lower AMR gene  
 7 abundance. The variable of Host\_age had a small but significant negative association with AMR  
 8 abundance (coef = -0.0054,  $p < 0.001$ ), indicating a decrease in abundance with increasing age.  
 9 These associations were consistent across both models, reinforcing the significance of each  
 10 factor. However, the Poisson model provided a more robust fit for the data. **Table 2**

| <b>Poisson Model Summary:</b>               |                     |                            |                |                 |               |               |
|---------------------------------------------|---------------------|----------------------------|----------------|-----------------|---------------|---------------|
| <b>Dep. Variable:</b>                       | Abundance           | No. Observations:          | 1459           |                 |               |               |
| Model:                                      | GLM                 | Df Residuals:              | 1459           |                 |               |               |
| Model Family:                               | Poisson             | Df Model:                  | 4              |                 |               |               |
| Link Function:                              | Log Scale:          | 1                          |                |                 |               |               |
| Method:                                     | IRLS                | Log-Likelihood:            | -8.77E+04      |                 |               |               |
| Deviance:                                   | 1.69E+05            |                            |                |                 |               |               |
| No. Iterations:                             | 6                   | <b>Pseudo R-squ. (CS):</b> | <b>0.9976</b>  |                 |               |               |
| Covariance Type:                            | nonrobust           |                            |                |                 |               |               |
| <b>Variable</b>                             | <b>coef</b>         | <b>std err</b>             | <b>z</b>       | <b>P&gt; z </b> | <b>[0.025</b> | <b>0.975]</b> |
| <b>const</b>                                | 4.5128              | 0.019                      | 239.696        | 0.001           | 4.476         | 4.55          |
| <b>Sample_Type</b>                          | 0.2697              | 0.009                      | 28.513         | 0.001           | 0.251         | 0.288         |
| <b>collection_location</b>                  | -0.1619             | 0.005                      | -32.345        | 0.001           | -0.172        | -0.152        |
| <b>host_sex</b>                             | -0.527              | 0.008                      | -63.693        | 0.001           | -0.543        | -0.511        |
| <b>host_age</b>                             | -0.0054             | 0                          | -28.815        | 0.001           | -0.006        | -0.005        |
| <b>Zero-Inflated Poisson Model Summary:</b> |                     |                            |                |                 |               |               |
| <b>Dep. Variable:</b>                       | Abundance           | No. Observations:          | 1459           |                 |               |               |
| Model:                                      | ZeroInflatedPoisson | Df Residuals:              | 1459           |                 |               |               |
| Method:                                     | MLE                 | Df Model:                  | 4              |                 |               |               |
| Log-Likelihood:                             | -8.77E+04           | <b>Pseudo R-squ.</b>       | <b>0.04787</b> |                 |               |               |
| Converged:                                  | True                | LL-Null:                   | -9.21E+04      |                 |               |               |
| Covariance Type:                            | nonrobust           | LLR p-value:               | 0              |                 |               |               |
| <b>Variable</b>                             | <b>coef</b>         | <b>std err</b>             | <b>z</b>       | <b>P&gt; z </b> | <b>[0.025</b> | <b>0.975]</b> |
| <b>inflate_const</b>                        | -20.5375            | 754.455                    | -0.027         | 0.981           | -1499.142     | 1458.167      |
| <b>const</b>                                | 4.5128              | 0.019                      | 239.696        | 0.001           | 4.476         | 4.55          |
| <b>Sample_Type</b>                          | 0.2697              | 0.009                      | 28.519         | 0.001           | 0.251         | 0.288         |
| <b>collection_location</b>                  | -0.1619             | 0.005                      | -32.338        | 0.001           | -0.172        | -0.152        |
| <b>host_sex</b>                             | -0.5269             | 0.008                      | -63.682        | 0.001           | -0.543        | -0.511        |

|          |         |   |         |       |        |        |
|----------|---------|---|---------|-------|--------|--------|
| host_age | -0.0054 | 0 | -28.815 | 0.001 | -0.006 | -0.005 |
|----------|---------|---|---------|-------|--------|--------|

1 **Table 2:** Results of the Poisson Generalized Linear Model (GLM) and the Zero-Inflated Poisson model,  
2 analyzing 1459 observations of abundance post >1 RPM filter. Key statistics include coefficients (coef),  
3 standard errors (std err), z-values, p-values ( $P>|z|$ ), and confidence intervals for various independent  
4 variables (predictors), including sample type, collection location, host sex, and host age.

5  
6

### 7 **3.7. The SARS-CoV-2 group showed a higher abundance of ESKAPE-associated AMR** 8 **genes**

9 The CZID AMR pipeline links AMR gene reads to their corresponding bacterial taxa, enabling  
10 visualization of variations in particular bacterial taxa and associated AMR genes. A comparative  
11 analysis of specific taxa-associated AMR genes between the SARS-CoV-2 and control groups  
12 was performed, with log-transformed abundance values of species and gene families to  
13 facilitate comparisons (**Figure 8**). This data also facilitates the comparative analysis of the  
14 abundance of ESKAPE-associated AMR genes among the datasets. It was observed that the  
15 SARS-CoV-2 group exhibited a higher prevalence and abundance of several ESKAPE  
16 pathogens and associated AMR gene families than the control group. Abundant gene families in  
17 the SARS-CoV-2 group included 16S rRNA methyltransferases (rmtC), ADC beta-lactamases,  
18 and MFS antibiotic efflux pumps linked to pathogens such as *Klebsiella pneumoniae*,  
19 *Acinetobacter baumannii*, and *Pseudomonas aeruginosa*. In contrast, the control group showed  
20 lower abundances of these AMR genes across most ESKAPE pathogens. A Sankey diagram  
21 illustrates the relationship between ESKAPE pathogens and AMR gene families, with  
22 connection thickness representing RPM values (**Figure 9**).

23  
24  
25  
26  
27  
28  
29  
30  
31  
32  
33  
34

1  
2  
3  
4  
5  
6  
7  
8  
9  
10  
11  
12  
13  
14  
15  
16  
17  
18  
19  
20  
21  
22  
23  
24  
25  
26  
27  
28  
29  
30  
31  
32

#### 4. Discussion

Several studies around the globe have investigated the compositional and functional dynamics of URT microbiome in SARS-CoV-2 patients; these studies tried to explain the relationships between the URT microbiome composition and factors like disease severity, risk of developing secondary infections and utility of URT microbiome as a marker to predict disease outcomes.<sup>24,25,26</sup> The SARS-CoV-2 infection plays a vital role in altering the URT microbiome. However, the impact of infection on the AMR dynamics in the URT needs to be explored. Understanding the changes in AMR profiles in context with SARS-CoV-2 infection is significant for predicting secondary bacterial infection outcomes and devising effective therapeutics and management strategies for COVID-19 patients.

Stefanini et al. (2021)<sup>27</sup> (Hoque et al., 2021)<sup>28</sup> reported that SARS-CoV-2 infection is associated with higher diversity and abundance of AMR genes, suggesting a more complex microbial ecosystem or dysbiosis. Our findings also suggest that SARS-CoV-2 infection could be linked with a higher diversity and abundance of AMR genes, which could have important implications for treatment strategies and public health. The sequencing results indicated a substantial number of reads generated for both groups. However, post-filtering for human reads significantly reduced microbial reads, particularly in the control group, which may indicate a less diverse microbial community than the SARS-CoV-2 group. Post-filtering, The higher number of microbial reads in the SARS-CoV-2 samples might suggest a more complex microbial ecosystem or a potential dysbiosis due to the viral infection.

The Chao1 index demonstrated that the SARS-CoV-2 group had a greater richness of AMR gene families than the control group. This finding aligns with previous studies indicating that viral infections can influence the composition and diversity in the context of gut<sup>29</sup> and URT<sup>30</sup> microbiomes. The lack of significant differences in the Shannon and Simpson indices suggests that while the SARS-CoV-2 group have a wider variety of AMR genes, the evenness of these

1 distributions is similar to that of the control group, implying that the higher richness in the SARS-  
2 CoV-2 group is not associated with the skewed abundance of a few gene families.

3 The PCA and PCoA analysis further established the variations in AMR gene abundances  
4 between the two groups. The distinct clustering in the PCA plots indicates that the microbial  
5 communities in SARS-CoV-2 patients differ markedly from those in the control group. The  
6 tighter clustering of control samples suggests a more homogenous microbial profile, while the  
7 greater spread of the SARS-CoV-2 samples implies a wider range of microbial interactions or  
8 influences, potentially driven by the viral infection itself or subsequent antibiotic treatments.

9 The Bray-Curtis dissimilarity heatmap also showed internal variability in the SARS-CoV-2  
10 samples, suggesting diverse AMR gene profiles that could be reflective of varied underlying  
11 health conditions, prior antibiotic exposure, or different environmental exposures among the  
12 patients. In contrast, the more uniform distribution among control samples highlights a less  
13 varied AMR gene landscape.

14 Given the non-normal distribution of the data, the Mann-Whitney test was appropriate for  
15 identifying significant variations in AMR gene families. Identifying 25 significantly varying gene  
16 families underscores the diversity in resistance mechanisms between the two groups, further  
17 implicating potential treatment challenges in the context of SARS-CoV-2 infection. A positive  
18 Log<sub>2</sub> Fold Change indicates that a gene is more abundant or highly expressed in SARS-CoV-2  
19 compared to control, while a negative Log<sub>2</sub> Fold Change suggests the gene is less abundant in  
20 SARS-CoV-2 than in control. A Log<sub>2</sub> Fold Change of 1 represents a 2-fold increase in gene  
21 abundance, whereas a Log<sub>2</sub> Fold Change of -1 corresponds to a 2-fold decrease in abundance.  
22 After using thresholds of log<sub>2</sub> fold change  $\pm 1$  and  $p < 0.05$  (Mann-Whitney), 24 AMR genes  
23 passed the applied thresholds, out of which 23 AMR genes showed higher abundance in SARS-  
24 CoV-2 samples, indicative of a potential link between SARS-CoV-2 infection and increased  
25 abundance of certain AMR genes. Only one gene, Isa-type ABC-F protein, was more abundant  
26 in the control group than the SARS-CoV-2 group. This finding points to potential changes in the  
27 resistance gene profile associated with SARS-CoV-2, potentially affecting the AMR dynamics in  
28 COVID-19 patients suffering from secondary bacterial infections. These gene families warrant  
29 further investigation, as they may contribute to the better clinical management of co-infections in  
30 COVID-19 patients.



1 The analysis of antimicrobial resistance (AMR) gene abundance using Poisson and Zero-  
2 Inflated Poisson (ZIP) regression models provided insights into covariates influencing AMR. The  
3 Poisson model demonstrated a high Pseudo R-squared of 0.9976, indicating it effectively  
4 explained the variance in AMR abundance, while the ZIP model's low Pseudo R-squared of  
5 0.04787 suggested it was less suitable for this dataset. A positive association between Sample  
6 Type (SARS-CoV-2 vs. control) and AMR abundance was observed, implying that viral  
7 infections may promote certain AMR genes. Additionally, the negative association with  
8 collection location highlighted geographic variability in AMR distribution, which is indicative of  
9 higher AMR abundances linked to certain locations (Districts of Vidarbha). Gender differences  
10 and a slight decline in AMR abundance with age were also noted. Further research is needed to  
11 explore the mechanisms behind these associations and their implications for antimicrobial  
12 stewardship.

13 Mann-Whitney U test also revealed several AMR gene families with significantly higher  
14 abundances in the SARS-CoV-2 group. These gene families encompass diverse antimicrobial  
15 resistance (AMR) mechanisms, including ribosomal modifications by 16S rRNA  
16 methyltransferases<sup>31</sup> and 23S rRNA methyltransferases<sup>32</sup>, conferring resistance to  
17 aminoglycosides and macrolides. Beta-lactamases like NDM, OCH, SHV, and TEM degrade  
18 beta-lactam antibiotics, including carbapenems<sup>33-36</sup>. Efflux pumps such as ABC, MFS, and RND  
19 actively expel antibiotics, promoting multidrug resistance<sup>37-39</sup>. Porins reduce drug permeability,  
20 while genes like qnr and rpoB provide resistance to quinolones and rifamycins<sup>40-42</sup>. Resistance  
21 to tetracyclines, fosfomycin, and other antibiotics is mediated by ribosomal protection proteins,  
22 inactivation enzymes, and transferases, highlighting the complexity of AMR mechanisms<sup>43-45</sup>.

23 The presence of ESKAPE-associated AMR genes in the URT microbiome showed that the  
24 SARS-CoV-2 group harboured a higher prevalence and abundance of these clinically relevant  
25 pathogens. The enrichment of AMR genes linked to ESKAPE pathogens, known for their high  
26 resistance and clinical significance, underscores the urgent need for effective antimicrobial  
27 stewardship and infection control measures, particularly in SARS-CoV-2 patients who may be at  
28 higher risk for secondary infections.

29 The analysis of AMR genes in the SARS-CoV-2 samples reveals significant resistance across  
30 multiple antibiotic drug classes. Resistance to macrolides, streptogramins, and lincosamides,  
31 which are commonly used for treating gram-positive infections<sup>46</sup>, could complicate treatment  
32 strategies for commonly occurring respiratory gram-positive infections. The detection of



1 resistance genes to broad-spectrum antibiotics, such as fluoroquinolones, tetracyclines, and  
2 beta-lactams, raises concerns about their limited efficacy, particularly in hospital settings where  
3 multidrug-resistant organisms are prevalent. The presence of peptide and glycopeptide  
4 resistance genes in the URT resistome, which includes resistance to last-resort antibiotics like  
5 colistin and vancomycin, was also observed among the samples. Additionally, resistance to  
6 nitroimidazoles, rifamycins, aminoglycosides, and pleuromutilins suggests that even alternative  
7 therapies may face reduced effectiveness in case of drug-resistant infection<sup>47</sup>. The identification  
8 of resistance to sulfonamides, phenicols, and nitrofurans points towards continuous and  
9 indiscriminate antibiotics, leading to reduced efficacy of these drug classes among the studied  
10 population. Moreover, resistance genes related to disinfecting agents and antiseptics highlight  
11 potential challenges in infection control within healthcare environments. Overall, these findings  
12 emphasize the need for robust AMR surveillance and antibiotic stewardship in the context of the  
13 COVID-19 pandemic, where bacterial co-infections in vulnerable patients may limit treatment  
14 options and contribute to the spread of resistant strains.

15 The increased diversity and abundance of AMR genes in SARS-CoV-2 patients could have  
16 significant implications for treatment protocols, necessitating a reassessment of antibiotic usage  
17 protocols, especially during viral infections like Influenza or SARS-CoV-2. Moreover, the  
18 identified gene families could serve as a data point to develop decision support systems for  
19 treating AMR in the context of COVID-19.

20 Further research is warranted to explore the clinical consequences of the observed AMR gene  
21 profiles, including the impact on treatment outcomes and the role of the URT microbiome in  
22 modulating host responses to SARS-CoV-2 infection. Longitudinal studies are needed to track  
23 changes in AMR gene abundance over time and assess the potential effects of various factors,  
24 including factors governing co-morbidities, degree of disease severity and antibiotic treatments.

25 In conclusion, the distinct AMR gene profiles observed in the SARS-CoV-2 group emphasize  
26 the need for ongoing surveillance and targeted interventions to mitigate the risks associated  
27 with antimicrobial resistance in the context of viral infections.

## 28 **Limitations of the Study**

29 The cross-sectional study design limits the ability to understand temporal changes in AMR gene  
30 profiles. Additionally, the potential impacts of antibiotic usage on AMR profiles could not be  
31 assessed in this study, as this is a retrospective study and antibiotic usage data were not

1 collected when the samples were originally obtained for SARS-CoV-2 genome surveillance  
2 under the INSACOG mandate. Furthermore, the ZIP regression model explained only a small  
3 portion of the variance observed in the data, indicating the presence of some unmeasured  
4 confounders. Future research could enhance the robustness of the findings.

5 \*\*\*

6

7

8

### Figure Legends

9

10 **Figure 1:** Overall Chao1, Shannon, and Simpson Diversity of AMR Genes: Chao1 diversity  
11 (left), Shannon diversity (center), and Simpson diversity (right) all display a greater range of  
12 diversity in the SARS-CoV-2 group, with statistically significant differences in Chao1 diversity (p  
13 < 0.01)

14

15 **Figure 2:** PCA and PCoA plots using the Bray-Curtis distance: The top plot represents the PCA  
16 (Principal Component Analysis) plot for SARS-CoV-2 and Control data, highlighting the variance  
17 explained by the first two components. SARS-CoV-2 samples are marked in red, and Control  
18 samples in blue. The bottom plot shows the PCoA (Principal Coordinates Analysis) of the same  
19 data, where the variation between the two groups is visualized across two primary axes, PC 1  
20 and PC 2.

21

22 **Figure 3:** Bray-Curtis Dissimilarity Heatmap: This heatmap represents the pairwise dissimilarity  
23 between the SARS-CoV-2 samples (Sample IDs in red) and control samples (Sample IDs in  
24 blue) using the Bray-Curtis metric. Samples with similar microbial compositions are closer to  
25 blue, while highly dissimilar samples are represented in red. The diagonal represents perfect  
26 similarity (self-comparison), indicated in dark blue.

27

28 **Figure 4:** Normality Distribution of SARS-CoV-2 and Control Group (Histogram and QQ plots):  
29 The figure shows the abundance distribution for two groups: a control group (top row) and a  
30 SARS-CoV-2 group (bottom row). The left panels are histograms illustrating the skewed

1 abundance data, while the right panels are Q-Q plots, highlighting deviations from normality,  
2 with significant tails on the right-hand side, indicating non-normal distributions in both groups.

3

4 **Figure 5:** Volcano plot of AMR gene family abundance changes between SARS-CoV-2 and  
5 control samples, based on a Mann-Whitney U test. The x-axis represents log<sub>2</sub> fold change  
6 (positive for SARS-CoV-2, negative for control), and the y-axis shows -log<sub>10</sub> p-values, with  
7 higher values indicating statistical significance. Points above the dashed line at -log<sub>10</sub>(0.05) are  
8 significant (p < 0.05). Gene families with |log<sub>2</sub> fold change| > 1 and p-value < 0.05 are  
9 highlighted in red, indicating significant abundance changes between the two groups.

10

11 **Figure 6:** Compositional Variations in the abundance of AMR gene families among Control and  
12 SARS-CoV-2 groups (Log-Transformed Significant Genes): The heatmaps illustrate the log-  
13 transformed abundance of significant AMR (antimicrobial resistance) genes across two groups:  
14 Control (top) and SARS-CoV-2 (bottom). Each row represents a distinct gene family, and each  
15 column represents a sample. The color intensity reflects gene abundance, with darker colors  
16 indicating higher abundance. The heatmaps provide a comparative visualization, highlighting  
17 compositional variations between the two groups.

18

19 **Figure 7:** Violin Plots of Significant AMR Gene Families (p-value < 0.05) Violin plots display the  
20 distribution of abundance for various AMR gene families that show significant differences (p <  
21 0.05) between Control (blue) and SARS-CoV-2 (red) groups. Each plot corresponds to a  
22 specific gene family, with the y-axis representing abundance and the x-axis representing the  
23 sample group. The plots highlight the central tendency, variability, and distribution shape of  
24 gene abundance, emphasizing differences in AMR gene composition between the groups.

25

26 **Figure 8:** Variations in the Abundance of ESKAPE-associated AMR Genes Among Control and  
27 SARS-CoV-2 Groups (Log-Transformed) The heatmaps display log-transformed read counts  
28 per million (RPM) of ESKAPE-associated species and AMR gene families in the Control (top)  
29 and SARS-CoV-2 (bottom) groups. The intensity of the color represents the abundance, with  
30 darker shades indicating the higher abundance of specific AMR gene families across species in  
31 each group.

32

33 **Figure 9:** Sankey Diagram Showing the Relationship Between Read Species and AMR Gene  
34 Families in SARS-CoV-2 and Control Groups This Sankey diagram illustrates the connections

1 between bacterial species and their associated antimicrobial resistance (AMR) gene families in  
2 both SARS-CoV-2 and Control groups. The width of the flows between species and gene  
3 families indicates the abundance in RPM.

4  
5

6

7

8

9

10

11

12

### 13 **Data availability statement**

14 The data is available as supplementary data with the file name  
15 “**combined\_supplementary\_data**” Any additional data, if required, will be made available on  
16 request by the authors.

17

### 18 **Author declaration**

19 The authors assure that the research has followed all ethical guidelines and received approvals  
20 from the Institutional Ethics Committee for Research on Human Subjects (IEC) of CSIR-NEERI,  
21 Nagpur-20, India. Necessary consent from patients/participants has been obtained, and relevant  
22 institutional documentation has been archived.

23

### 24 **Confidentiality declaration**

25 Sample IDs (23G214-5G-264\_S1 to 23G214-5G-311\_S48 and 24D214-5G\_387\_S45 to  
26 24D214-5G\_434\_S91) are masked IDs and cannot be traced to participant details. The precise  
27 age of the participants is masked, and non-overlapping age ranges were used.

28

### 29 **Author contribution statement**

30 SST and KK have contributed equally to the conceptualization, experimentation, and data  
31 analysis of this study.

32

### 33 **Conflict of interest statement**

34 The authors declare no conflict of interest

1  
2  
3  
4  
5  
6  
7  
8  
9  
10  
11  
12  
13  
14  
15  
16  
17  
18  
19  
20  
21  
22  
23  
24  
25  
26  
27  
28  
29  
30  
31  
32  
33  
34  
35

## Acknowledgement

The authors are thankful to CSIR-NEERI for providing funds under project OLP-57 (March 2023 -April 2024) for conducting this study. This manuscript has obtained the approval of the Knowledge Resource Center (KRC) publication committee of CSIR-NEERI

**(KRC No.: CSIR-NEERI/KRC/2024/NOV/EPM/1) Date: 14-11-2024**

## References

1. Ramamurthy, T., Ghosh, A., Chowdhury, G., Mukhopadhyay, A. K., Dutta, S., & Miyoshi, S. (2022). Deciphering the genetic network and programmed regulation of antimicrobial resistance in bacterial pathogens. *Frontiers in Cellular and Infection Microbiology*, 12, 952491. <https://doi.org/10.3389/fcimb.2022.952491>
2. Kessler, C., Hou, J., Neo, O., & Buckner, M. (2022). In situ, in vivo, and in vitro approaches for studying AMR plasmid conjugation in the gut microbiome. *FEMS Microbiology Reviews*, 47. <https://doi.org/10.1093/femsre/fuac044>.
3. Boerlin, P., & Reid-Smith, R. (2008). Antimicrobial resistance: its emergence and transmission. *Animal Health Research Reviews*, 9, 115 - 126. <https://doi.org/10.1017/S146625230800159X>.
4. Hanada, S., Pirzadeh, M., Carver, K., & Deng, J. (2018). Respiratory Viral Infection-Induced Microbiome Alterations and Secondary Bacterial Pneumonia. *Frontiers in Immunology*, 9. <https://doi.org/10.3389/fimmu.2018.02640>.
5. Tan, K., Lim, R., Liu, J., Ong, H., Tan, V., Lim, H., Chung, K., Adcock, I., Chow, V., & Wang, D. (2020). Respiratory Viral Infections in Exacerbation of Chronic Airway Inflammatory Diseases: Novel Mechanisms and Insights From the Upper Airway Epithelium. *Frontiers in Cell and Developmental Biology*, 8. <https://doi.org/10.3389/fcell.2020.00099>.
6. Bottery, M., Pitchford, J., & Friman, V. (2020). Ecology and evolution of antimicrobial resistance in bacterial communities. *The ISME Journal*, 15, 939 - 948. <https://doi.org/10.1038/s41396-020-00832-7>.
7. Despotovic, M., De Nies, L., Busi, S. B., & Wilmes, P. (2023). Reservoirs of antimicrobial resistance in the context of One Health. *Current Opinion in Microbiology*, 73, 102291. <https://doi.org/10.1016/j.mib.2023.102291>

- 1 8. Segala, F. V., Bavaro, D. F., Di Gennaro, F., Salvati, F., Marotta, C., Saracino, A., Murri, R., &  
2 Fantoni, M. (2021). Impact of SARS-CoV-2 Epidemic on Antimicrobial Resistance: A Literature  
3 Review. *Viruses*, 13(11), 2110. <https://doi.org/10.3390/v13112110>
- 4 9. Sender, V., & Hentrich, K. (2021). Virus-Induced Changes of the Respiratory Tract Environment  
5 Promote Secondary Infections With *Streptococcus pneumoniae*. *Frontiers in Cellular and*  
6 *Infection Microbiology*, 11, 643326. <https://doi.org/10.3389/fcimb.2021.643326>
- 7 10. World Health Organization: WHO. (2024, April 26). WHO reports widespread overuse of  
8 antibiotics in patients hospitalized with COVID-19. World Health Organization.  
9 [https://www.who.int/news/item/26-04-2024-who-reports-widespread-overuse-of-antibiotics-in-](https://www.who.int/news/item/26-04-2024-who-reports-widespread-overuse-of-antibiotics-in-patients--hospitalized-with-covid-19#:~:text=Highest%20rate%20of%20antibiotic%20use,the%20African%20Region%20(79%25).)  
10 [patients--hospitalized-with-covid-](https://www.who.int/news/item/26-04-2024-who-reports-widespread-overuse-of-antibiotics-in-patients--hospitalized-with-covid-19#:~:text=Highest%20rate%20of%20antibiotic%20use,the%20African%20Region%20(79%25).)  
11 [19#:~:text=Highest%20rate%20of%20antibiotic%20use,the%20African%20Region%20\(79%25\).](https://www.who.int/news/item/26-04-2024-who-reports-widespread-overuse-of-antibiotics-in-patients--hospitalized-with-covid-19#:~:text=Highest%20rate%20of%20antibiotic%20use,the%20African%20Region%20(79%25).)
- 12 11. Fazel, P., Sedighian, H., Behzadi, E., Kachuei, R., & Fooladi, A. a. I. (2023). Interaction between  
13 SARS-COV-2 and pathogenic bacteria. *Current Microbiology*, 80(7).  
14 <https://doi.org/10.1007/s00284-023-03315-y>
- 15 12. Rehman, S. (2023). A parallel and silent emerging pandemic: Antimicrobial resistance (AMR)  
16 amid COVID-19 pandemic. *Journal of Infection and Public Health*, 16(4), 611–617.  
17 <https://doi.org/10.1016/j.jiph.2023.02.021>
- 18 13. Mac Aogáin, M., Lau, K. J. X., Cai, Z., Narayana, J. K., Purbojati, R. W., Drautz-Moses, D. I.,  
19 Gaultier, N. E., Jaggi, T. K., Tiew, P. Y., Ong, T. H., Koh, M. S., Hou, A. L. Y., Abisheganaden, J.  
20 A., Tsaneva-Atanasova, K., Schuster, S. C., & Chotirmall, S. H. (2020). Metagenomics reveals a  
21 core macrolide resistome related to microbiota in chronic respiratory disease. *American Journal*  
22 *of Respiratory and Critical Care Medicine*, 202(3), 433–447. [https://doi.org/10.1164/rccm.201911-](https://doi.org/10.1164/rccm.201911-2202oc)  
23 [2202oc](https://doi.org/10.1164/rccm.201911-2202oc)
- 24 14. Nath, S., Sarkar, M., Maddheshiya, A., De, D., Paul, S., Dey, S., Pal, K., Roy, S. K., Ghosh, A.,  
25 Sengupta, S., Paine, S. K., Biswas, N. K., Basu, A., & Mukherjee, S. (2023). Upper respiratory  
26 tract microbiome profiles in SARS-CoV-2 Delta and Omicron infected patients exhibit variant  
27 specific patterns and robust prediction of disease groups. *Microbiology Spectrum*, 11(6).  
28 <https://doi.org/10.1128/spectrum.02368-23>
- 29 15. QIASEq FX DNA Library Kit. (2023). Qiagen.com. [https://www.qiagen.com/zh-](https://www.qiagen.com/zh-us/products/discovery-and-translational-research/next-generation-sequencing/metagenomics/qiaseq-fx-dna-library-kit)  
30 [us/products/discovery-and-translational-research/next-generation-](https://www.qiagen.com/zh-us/products/discovery-and-translational-research/next-generation-sequencing/metagenomics/qiaseq-fx-dna-library-kit)  
31 [sequencing/metagenomics/qiaseq-fx-dna-library-kit](https://www.qiagen.com/zh-us/products/discovery-and-translational-research/next-generation-sequencing/metagenomics/qiaseq-fx-dna-library-kit)
- 32 16. Langmead, B., & Salzberg, S. L. (2012). Fast gapped-read alignment with Bowtie 2. *Nature*  
33 *Methods*, 9(4), 357-359. <https://doi.org/10.1038/nmeth.1923>
- 34 17. Chen, S. (2023). Ultrafast one-pass FASTQ data preprocessing, quality control, and  
35 deduplication using fastp. *IMeta*, 2(2), e107. <https://doi.org/10.1002/imt2.107>

- 1 18. Kim, D., Paggi, J. M., Park, C., Bennett, C., & Salzberg, S. L. (2019). Graph-based genome  
2 alignment and genotyping with HISAT2 and HISAT-genotype. *Nature Biotechnology*, 37(8), 907-  
3 915. <https://doi.org/10.1038/s41587-019-0201-4>
- 4 19. Dobin, A., Davis, C. A., Schlesinger, F., Drenkow, J., Zaleski, C., Jha, S., Batut, P., Chaisson, M.,  
5 & Gingeras, T. R. (2012). STAR: ultrafast universal RNA-seq aligner. *Bioinformatics*, 29(1), 15-  
6 21. <https://doi.org/10.1093/bioinformatics/bts635>
- 7 20. Li, H. (2018). Minimap2: Pairwise alignment for nucleotide sequences. *Bioinformatics*, 34(18),  
8 3094-3100. <https://doi.org/10.1093/bioinformatics/bty191>
- 9 21. Buchfink, B., Xie, C., & Huson, D. H. (2014). Fast and sensitive protein alignment using  
10 DIAMOND. *Nature Methods*, 12(1), 59-60. <https://doi.org/10.1038/nmeth.3176>
- 11 22. Langelier, C., Lu, D., Kalantar, K., Chu, V., Glascock, A., Guerrero, E., Bernick, N., Butcher, X.,  
12 Ewing, K., Fahsbender, E., Holmes, O., Hoops, E., Jones, A., Lim, R., McCanny, S., Reynoso, L.,  
13 Rosario, K., Tang, J., Valenzuela, O., . . . McArthur, A. (2024). Simultaneous detection of  
14 pathogens and antimicrobial resistance genes with the open source, cloud-based, CZ ID pipeline.  
15 Research Square (Research Square). <https://doi.org/10.21203/rs.3.rs-4271356/v1>
- 16 23. Alcock, B. P., Huynh, W., Chalil, R., Smith, K. W., Raphenya, A. R., Wlodarski, M. A.,  
17 Edalatmand, A., Petkau, A., Syed, S. A., Tsang, K. K., Baker, S. J. C., Dave, M., McCarthy, M.  
18 C., Mukiri, K. M., Nasir, J. A., Golbon, B., Imtiaz, H., Jiang, X., Kaur, K., . . . McArthur, A. G.  
19 (2022). CARD 2023: expanded curation, support for machine learning, and resistome prediction  
20 at the Comprehensive Antibiotic Resistance Database. *Nucleic Acids Research*, 51(D1), D690-  
21 D699. <https://doi.org/10.1093/nar/gkac920>
- 22 24. De Maio, F., Posteraro, B., Ponziani, F. R., Cattani, P., Gasbarrini, A., & Sanguinetti, M. (2020).  
23 Nasopharyngeal microbiota profiling of SARS-COV-2 infected patients. *Biological Procedures*  
24 *Online*, 22(1). <https://doi.org/10.1186/s12575-020-00131-7>
- 25 25. Rhoades, N. S., Pinski, A. N., Monsibais, A. N., Jankeel, A., Doratt, B. M., Cinco, I. R., Ibraim, I.,  
26 & Messaoudi, I. (2021). Acute SARS-CoV-2 infection is associated with an increased abundance  
27 of bacterial pathogens, including *Pseudomonas aeruginosa* in the nose. *Cell Reports*, 36(9),  
28 109637. <https://doi.org/10.1016/j.celrep.2021.109637>
- 29 26. Ventero, M. P., Moreno-Perez, O., Molina-Pardines, C., Paytuví-Gallart, A., Boix, V., Escribano,  
30 I., Galan, I., González-de-laAleja, P., López-Pérez, M., Sánchez-Martínez, R., Merino, E., &  
31 Rodríguez, J. C. (2022). Nasopharyngeal Microbiota as an early severity biomarker in COVID-19  
32 hospitalised patients. *Journal of Infection*, 84(3), 329-336.  
33 <https://doi.org/10.1016/j.jinf.2021.12.030>
- 34 27. Stefanini, I., De Renzi, G., Foddai, E., Cordani, E., & Mognetti, B. (2021). Profile of Bacterial  
35 Infections in COVID-19 Patients: Antimicrobial Resistance in the Time of SARS-CoV-2. *Biology*,  
36 10(9), 822. <https://doi.org/10.3390/biology10090822>



- 1 28. Hoque, M. N., Sarkar, M. M., Rahman, M. S., Akter, S., Banu, T. A., Goswami, B., Jahan, I.,  
2 Hossain, M. S., Shamsuzzaman, A. K., Nafisa, T., Molla, M. M., Yeasmin, M., Ghosh, A. K.,  
3 Osman, E., Alam, S. K., Uzzaman, M. S., Habib, M. A., Mahmud, A. S., Crandall, K. A., . . .  
4 Khan, M. S. (2021). SARS-CoV-2 infection reduces human nasopharyngeal commensal  
5 microbiome with inclusion of pathobionts. *Scientific Reports*, 11(1), 1-17.  
6 <https://doi.org/10.1038/s41598-021-03245-4>
- 7 29. Li, J., Jing, Q., Li, J., Hua, M., Di, L., Song, C., Huang, Y., Wang, J., Chen, C., & Wu, A. R.  
8 (2023). Assessment of microbiota in the gut and upper respiratory tract associated with SARS-  
9 CoV-2 infection. *Microbiome*, 11(1). <https://doi.org/10.1186/s40168-022-01447-0>
- 10 30. Shilts, M. H., Rosas-Salazar, C., Strickland, B. A., Kimura, K. S., Asad, M., Sehanobish, E.,  
11 Freeman, M. H., Wessinger, B. C., Gupta, V., Brown, H. M., Boone, H. H., Patel, V., Barbi, M.,  
12 Bottalico, D., O'Neill, M., Akbar, N., Rajagopala, S. V., Mallal, S., Phillips, E., . . . Das, S. R.  
13 (2022). Severe COVID-19 is associated with an altered upper respiratory tract microbiome.  
14 *Frontiers in Cellular and Infection Microbiology*, 11. <https://doi.org/10.3389/fcimb.2021.781968>
- 15 31. Zarubica, T., Baker, M. R., Wright, H. T., & Rife, J. P. (2010). The aminoglycoside resistance  
16 methyltransferases from the ArmA/Rmt family operate late in the 30S ribosomal biogenesis  
17 pathway. *RNA*, 17(2), 346–355. <https://doi.org/10.1261/rna.2314311>
- 18 32. Park, A. K., Kim, H., & Jin, H. J. (2010). Phylogenetic analysis of rRNA methyltransferases, Erm  
19 and KsgA, as related to antibiotic resistance. *FEMS Microbiology Letters*, no.  
20 <https://doi.org/10.1111/j.1574-6968.2010.02031.x>
- 21 33. Kumarasamy, K. K., Toleman, M. A., Walsh, T. R., Bagaria, J., Butt, F., Balakrishnan, R.,  
22 Chaudhary, U., Doumith, M., Giske, C. G., Irfan, S., Krishnan, P., Kumar, A. V., Maharjan, S.,  
23 Mushtaq, S., Noorie, T., Paterson, D. L., Pearson, A., Perry, C., Pike, R., . . . Woodford, N.  
24 (2010). Emergence of a new antibiotic resistance mechanism in India, Pakistan, and the UK: a  
25 molecular, biological, and epidemiological study. *The Lancet Infectious Diseases*, 10(9), 597–  
26 602. [https://doi.org/10.1016/s1473-3099\(10\)70143-2](https://doi.org/10.1016/s1473-3099(10)70143-2)
- 27 34. Nadjar, D., Labia, R., Cerceau, C., Bizet, C., Philippon, A., & Arlet, G. (2001). Molecular  
28 Characterization of Chromosomal Class C  $\beta$ -Lactamase and Its Regulatory Gene in  
29 *Ochrobactrum anthropi*. *Antimicrobial Agents and Chemotherapy*, 45(8), 2324–2330.  
30 <https://doi.org/10.1128/aac.45.8.2324-2330.2001>
- 31 35. Bradford, P. A. (2001). Extended-Spectrum B-Lactamases in the 21st Century: Characterization,  
32 Epidemiology, and detection of this important resistance threat. *Clinical Microbiology Reviews*,  
33 14(4), 933–951. <https://doi.org/10.1128/cmr.14.4.933-951.2001>
- 34 36. Bradford, P. A. (2001). Extended-Spectrum B-Lactamases in the 21st Century: Characterization,  
35 Epidemiology, and detection of this important resistance threat. *Clinical Microbiology Reviews*,  
36 14(4), 933–951. <https://doi.org/10.1128/cmr.14.4.933-951.2001>

- 1 37. Fath, M. J., & Kolter, R. (1993). ABC transporters: bacterial exporters. *Microbiological Reviews*,  
2 57(4), 995–1017. <https://doi.org/10.1128/mr.57.4.995-1017.1993>
- 3 38. Li, X., & Nikaido, H. (2009). Efflux-Mediated Drug Resistance in bacteria. *Drugs*, 69(12), 1555–  
4 1623. <https://doi.org/10.2165/11317030-000000000-00000>
- 5 39. Blair, J. M., & Piddock, L. J. (2009). Structure, function and inhibition of RND efflux pumps in  
6 Gram-negative bacteria: an update. *Current Opinion in Microbiology*, 12(5), 512–519.  
7 <https://doi.org/10.1016/j.mib.2009.07.003>
- 8 40. Wright, A. G. M. G. D. (2024). The Comprehensive Antibiotic Resistance Database General  
9 Bacterial porin with reduced permeability to beta-lactams. Retrieved October 23, 2024, from  
10 <https://card.mcmaster.ca/ontology/41445>
- 11 41. Wang, M., Guo, Q., Xu, X., Wang, X., Ye, X., Wu, S., Hooper, D. C., & Wang, M. (2009). New  
12 Plasmid-Mediated Quinolone Resistance Gene, qnrC , Found in a Clinical Isolate of *Proteus*  
13 *mirabilis*. *Antimicrobial Agents and Chemotherapy*, 53(5), 1892–1897.  
14 <https://doi.org/10.1128/aac.01400-08>
- 15 42. Ingham, C. J., & Furneaux, P. A. (2000). Mutations in the  $\beta$  subunit of the *Bacillus subtilis* RNA  
16 polymerase that confer both rifampicin resistance and hypersensitivity to NusG. *Microbiology*,  
17 146(12), 3041–3049. <https://doi.org/10.1099/00221287-146-12-3041>
- 18 43. Wright, A. G. M. G. D. (2024). The Comprehensive Antibiotic Resistance Database tetracycline-  
19 resistant ribosomal protection protein. Retrieved October 23, 2024, from  
20 <https://card.mcmaster.ca/ontology/35921>
- 21 44. Nguyen, F., Starosta, A. L., Arenz, S., Sohmen, D., Dönhöfer, A., & Wilson, D. N. (2014).  
22 Tetracycline antibiotics and resistance mechanisms. *Biological Chemistry*, 395(5), 559–575.  
23 <https://doi.org/10.1515/hsz-2013-0292>
- 24 45. Rigsby, R. E., Rife, C. L., Fillgrove, K. L., Newcomer, M. E., & Armstrong, R. N. (2004).  
25 Phosphonoformate: a minimal transition state analogue inhibitor of the fosfomycin resistance  
26 protein, FOSA,. *Biochemistry*, 43(43), 13666–13673. <https://doi.org/10.1021/bi048767h>
- 27 46. Lim, J., Kwon, A., Kim, S., Chong, Y., Lee, K., & Choi, E. (2002). Prevalence of resistance to  
28 macrolide, lincosamide and streptogramin antibiotics in Gram-positive cocci isolated in a Korean  
29 hospital.. *The Journal of antimicrobial chemotherapy*, 49 3, 489-95 .  
30 <https://doi.org/10.1093/JAC/49.3.489>.
- 31 47. Guardabassi, L., & Courvalin, P. Modes of Antimicrobial Action and Mechanisms of Bacterial  
32 Resistance. 1-18. <https://doi.org/10.1128/9781555817534.ch1>

Chao1 Diversity  
Stat=841.00, p=3.27e-07

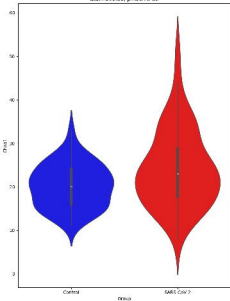

Shannon Diversity  
Stat=11.74.00, p=7.35e-01

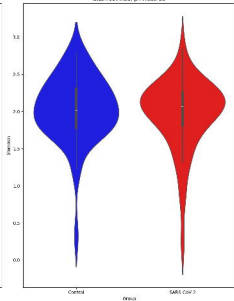

Simpson Diversity  
Stat=1262.00, p=3.20e-01

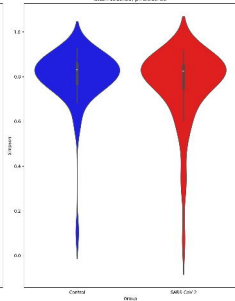

## PCA and PCoA plots using the Bray-Curtis distance

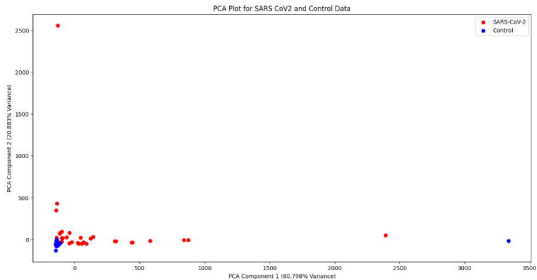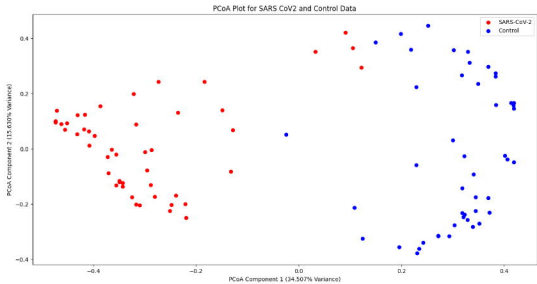

Bray-Curtis Dissimilarity Heatmap

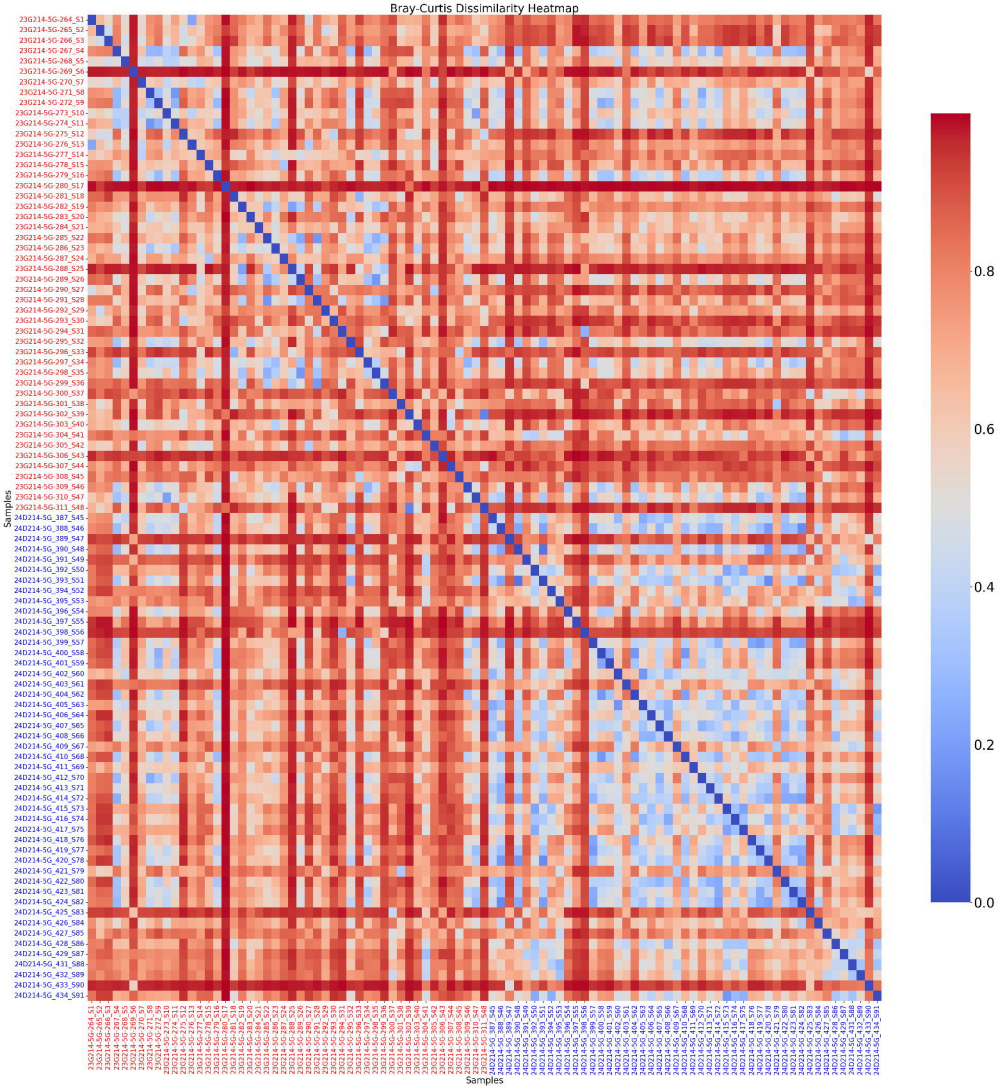

## Normality Distribution of SARS-CoV-2 and Control Group (Histogram and QQ plots)

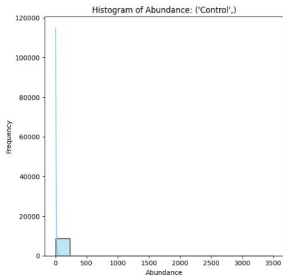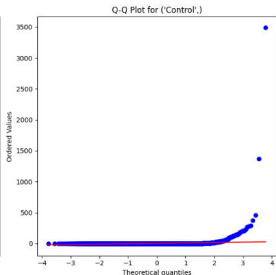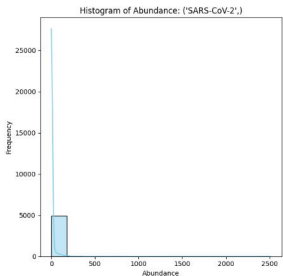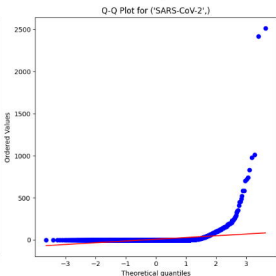

Volcano Plot of AMH Gene Abundance Changes in SARS-CoV-2 vs Control (Kruskal-Wallis test)

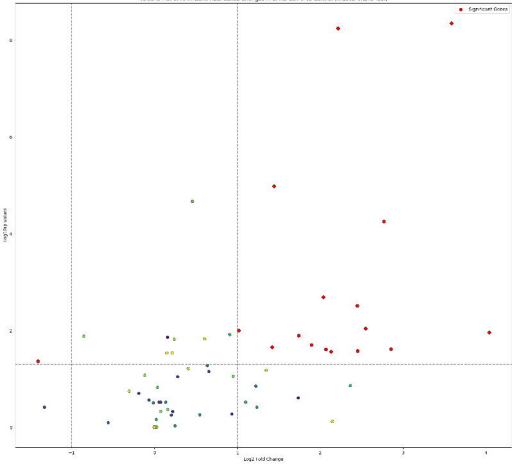



Compositional Variations in the abundance of AMR gene families among Control and SARS-CoV-2 groups (Log-Transformed (Significant Genes))

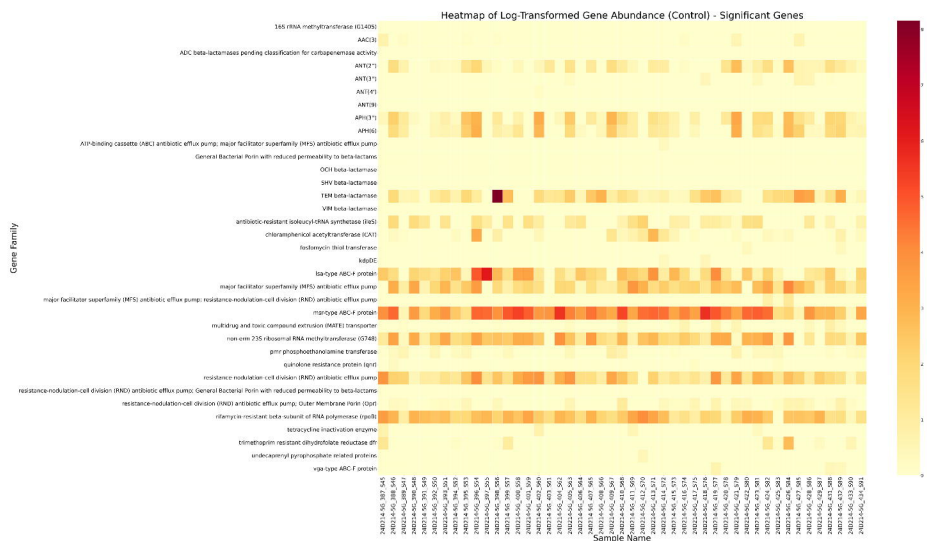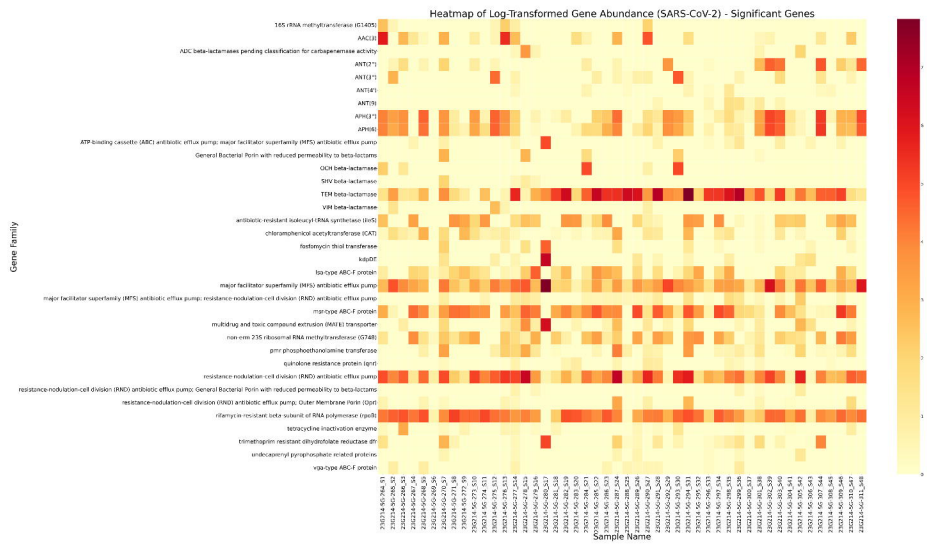

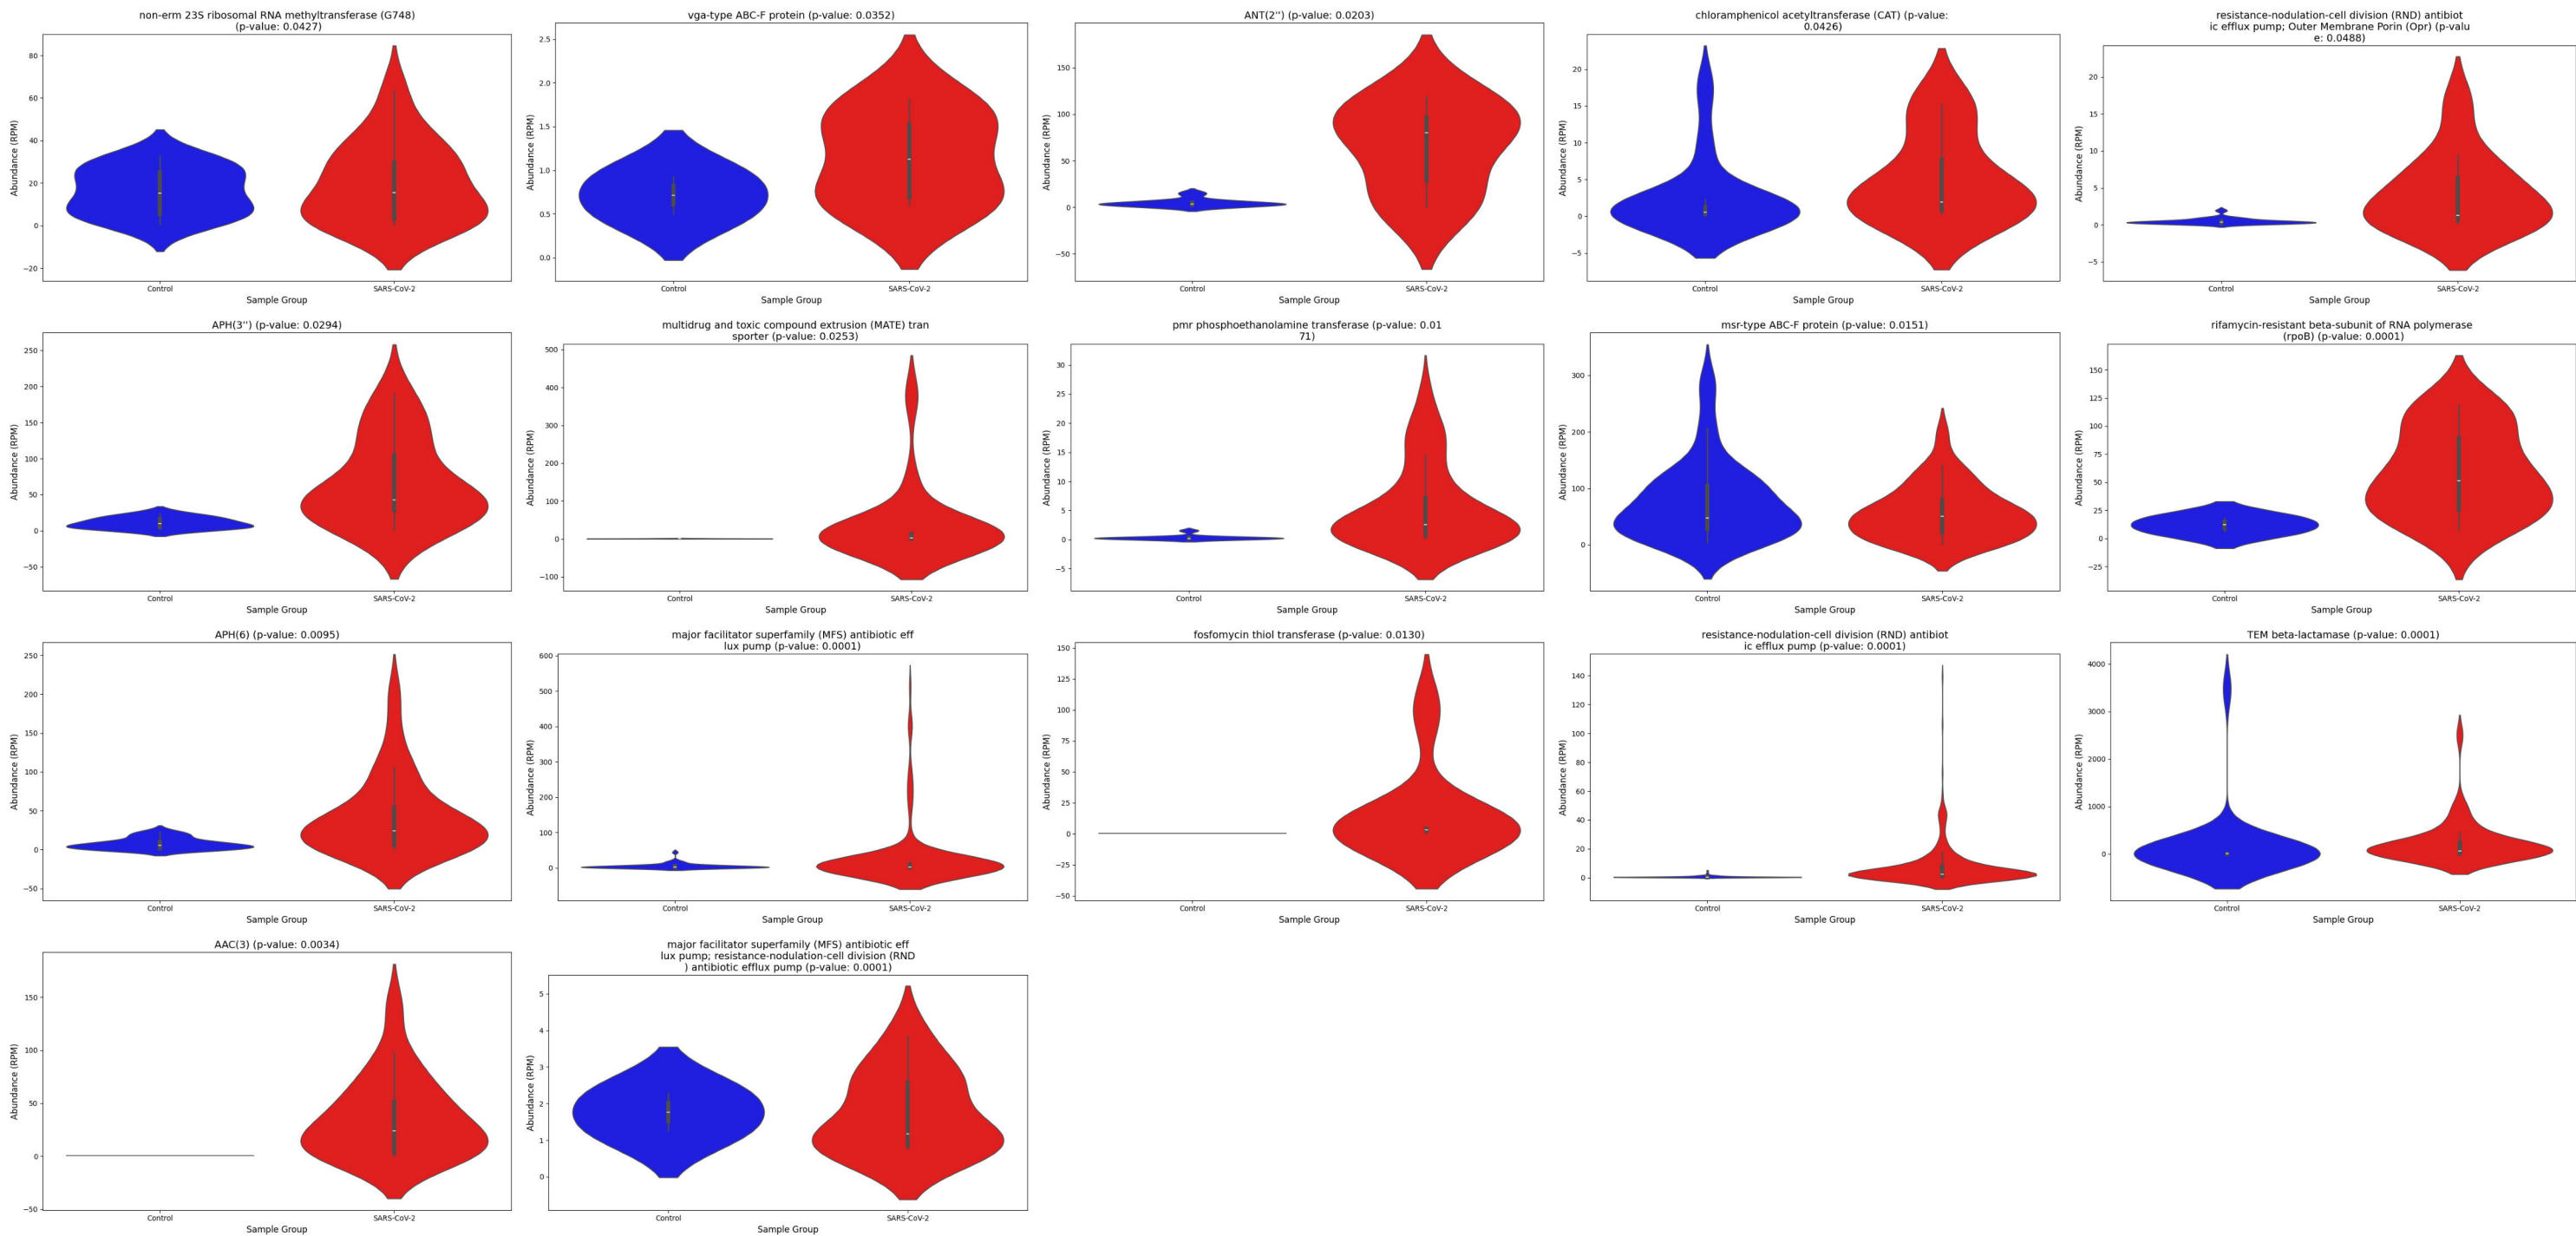

Log transformed KPI heatmap of species and gene families (K00000)

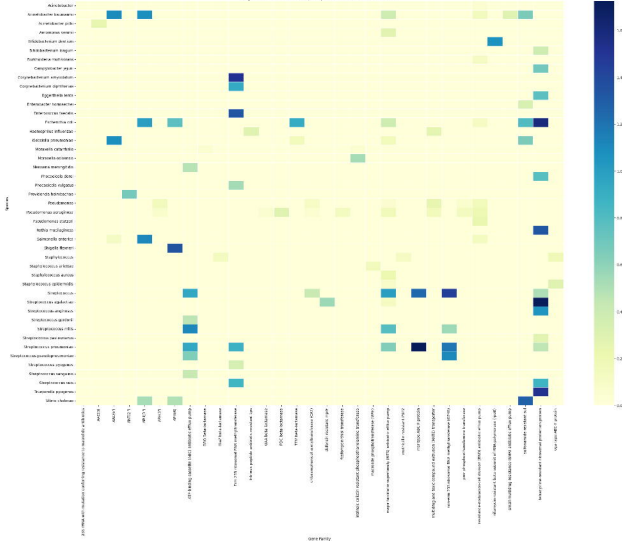

Log transformed KPI heatmap of species and gene families (S00000)

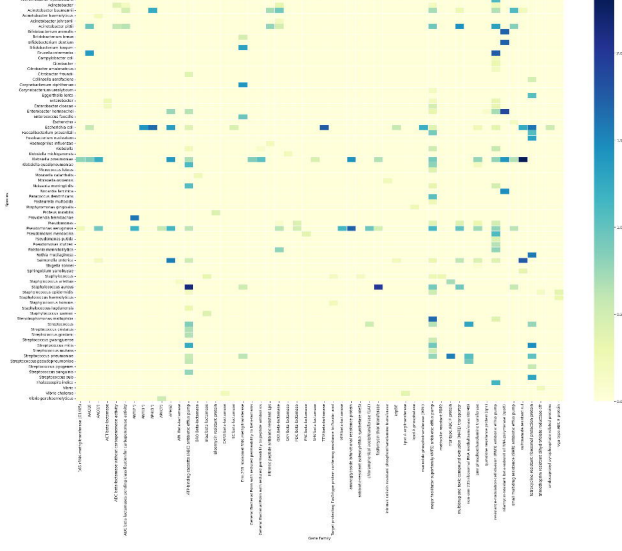

# Sankey Diagram Showing the relationship between Read Species and AMR gene Families in SARS-CoV-2 and Control Group

## Sankey Diagram Showing the relationship between Read Species and AMR gene Families in Control Group

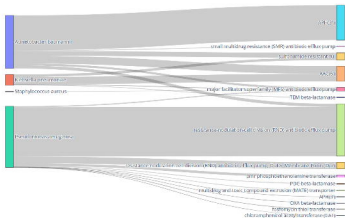

## Sankey Diagram Showing the relationship between Read Species and AMR gene Families in SARS-CoV-2 Group

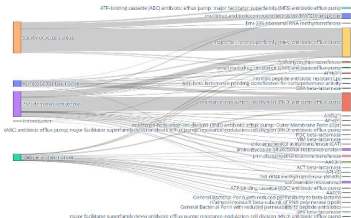

Source: https://medrxiv.org/content/10.1101/2024.11.14.24317312v1.full.pdf
