# 1 Impact of SARS-CoV-2 Infection on Antimicrobial Resistance Gene Profiles in the 2 Upper Respiratory Tract: A Cross-Sectional Study

3

4 Authors: Siddharth Singh Tomar<sup>1,2</sup> & Krishna Khairnar<sup>1,2\*</sup>

5 Author Affiliation: <sup>1</sup>Environmental Epidemiology and Pandemic Management (EE&PM), Council of  
6 Scientific and Industrial Research-National Environmental Engineering Research Institute (CSIR-NEERI),  
7 Nagpur, India.

8 &

9 <sup>2</sup>Academy of Scientific and Innovative Research (AcSIR), Ghaziabad, UP, India.

10 \*Corresponding author: Correspondence to Krishna Khairnar

11 e-mail: [k\\_khairnar@neeri.res.in](mailto:k_khairnar@neeri.res.in), [kskhairnar@gmail.com](mailto:kskhairnar@gmail.com)

12

13

## Abstract

### 14 Objectives:

15 To investigate the impact of SARS-CoV-2 infection on the antimicrobial resistance (AMR) gene profiles in  
16 the upper respiratory tract (URT) and To evaluate variations in AMR gene diversity, abundance, and  
17 ESKAPE-associated AMR in URT. By comparing SARS-CoV-2-positive patients to healthy controls.

18

### 19 Methods:

20 95 URT swab samples from SARS-CoV-2-positive (n=48) and RTPCR-negative control participants  
21 (n=47) collected from central India. Metagenomic DNA was extracted, and metagenomic sequencing was  
22 performed using the Illumina NextSeq550 platform. Sequencing data were analysed using the Chan  
23 Zuckerberg ID pipeline for Antimicrobial resistance (AMR) gene detection and taxonomic profiling. Chao1,  
24 Shannon and Simpson diversity indices, Bray-Curtis dissimilarity, and Bayesian regression, were used to  
25 identify significant differences in AMR gene abundance and microbial associations.

26

### 27 Results:

28 The Chao1 index (p=0.01651) of SARS-CoV-2 samples indicated significantly higher AMR gene richness  
29 than the controls. Resistance genes, such as *mecA*, *blaOXA-48*, and *blaNDM-1*, showed higher  
30 abundance in SARS-CoV-2 samples. These genes were found to be linked to high-priority pathogens like  
31 *Klebsiella pneumoniae*, *Escherichia coli*, and *Staphylococcus aureus*. Bayesian regression demonstrated  
32 that SARS-CoV-2 infection is a significant factor in elevated AMR gene abundance ( $\beta = 1.549$ , HDI  
33 [1.409, 1.691]). Females showed higher AMR levels than males ( $\beta = 0.261$ , HDI [0.167, 0.350]), and the  
34 model outputs showed no significant age correlation. Sankey diagrams and heatmaps showed higher  
35 AMR gene diversity and abundance in the SARS-CoV-2 group.

36

### 37 Conclusions:

38 SARS-CoV-2 infection alters the URT's AMR gene profile and increases the resistance genes' abundance  
39 and diversity. The results indicate a requirement to enhance AMR surveillance of COVID-19 patients to  
40 adapt antimicrobial stewardship strategies and reduce the chances of secondary infections. It is,  
41 therefore, essential to carry out more extensive studies to analyze temporal variations and the effects of  
42 antibiotic overuse on AMR evolution.

43

44 **Keywords:** SARS-CoV-2, antimicrobial resistance, resistome, upper respiratory tract, metagenomics,  
45 ESKAPE pathogens, antibiotic resistance.

46

## 1 Introduction

2 The global SARS-CoV-2 pandemic has induced research into its broader effects. This study  
3 focuses on the Antimicrobial resistance (AMR) dynamics in the upper respiratory tract (URT) of  
4 SARS-CoV-2-infected individuals. The URT is the primary entry point and predisposition site for  
5 respiratory viruses. Therefore, URT is an important site for studying AMR diversity in SARS-  
6 CoV-2-infected individuals. SARS-CoV-2 infection may contribute to dysbiosis of baseline URT  
7 flora and promote the spread of AMR genes<sup>1, 2,3</sup>. Respiratory viral infections have been shown  
8 to alter microbial diversity and contribute to secondary bacterial infections<sup>4</sup> and favoring  
9 pathogenic bacteria capable of acquiring resistance<sup>5</sup>.

10 AMR in respiratory infections is a growing concern due to widespread antibiotic use even before  
11 the SARS-CoV-2 pandemic. Indiscriminate antibiotic use disrupts the microbial balance and  
12 promotes the enrichment of resistant organisms<sup>6</sup>. Respiratory resistomes serve as reservoirs  
13 for resistance genes transferable to pathogenic bacteria<sup>7</sup>. Studies have shown that SARS-CoV-  
14 2 infection influences microbial communities and resistomes of patients<sup>8</sup>. Virus-induced  
15 inflammation and immune suppression promote bacterial growth and enrichment of AMR genes  
16 in SARS-CoV-2-positive individuals. Recently, the World Health Organisation has also  
17 highlighted the overuse of antibiotics in COVID-19 patients contributing to increasing AMR<sup>9</sup>.

18 Microbiome studies on COVID-19 patients reveal shifts in diversity and increased abundance of  
19 clinically important pathogens like *Staphylococcus aureus* and *Pseudomonas aeruginosa*.  
20 These pathogens can acquire resistance to common antibiotics<sup>10</sup>. The AMR genes like blaKPC,  
21 blaNDM, and mecA in COVID-19 patients, responsible for resistance in ESKAPE pathogens,  
22 were detected in the resistomes of SARS-CoV-2 positive individuals<sup>11</sup>. Despite growing  
23 evidence of SARS-CoV-2's impact on the resistome, further research is required to fully  
24 understand the effects of viral infection on AMR abundance and diversity, for which  
25 metagenomic sequencing is a valuable tool<sup>12</sup>.

26 Few studies have investigated the relationship between SARS-CoV-2 infection and changes in  
27 the URT resistome in the Indian context. Researchers investigated changes in the URT  
28 microbiome of SARS-CoV-2-infected individuals to identify infection-specific signatures for  
29 developing nasal prebiotic therapies<sup>13</sup>. However, they did not examine AMR alterations in the  
30 URT of SARS-CoV-2-positive individuals. This study uses a metagenomic approach to

1 understand the effect of SARS-CoV-2 infection on URT resistome and abundance of ESKAPE  
2 pathogens.

## 3 **2. Materials and methods**

### 4 **2.1. Study Population**

5 The samples used for the study were collected during March-April 2023. The study population  
6 belongs to the Vidarbha region of Central India, with samples collected from participants across  
7 five districts: Nagpur, Wardha, Gadchiroli, Chandrapur, and Bhandara. For the SARS-CoV-2  
8 Negative Group (Control), the median age (interquartile range [IQR]) is 29 years (22 to 37). For  
9 the SARS-CoV-2 Positive Group, the median age (IQR) is 36 years (19 to 67). Participants from  
10 the SARS-CoV-2 group presented with severe acute respiratory infection (SARI) and/or  
11 influenza-like illness (ILI) symptoms. While the participants from the control group were  
12 asymptomatic and RTPCR negative.

13

### 14 **2.2. Sample Collection and Processing**

15 In total, 96 URT swab samples in Viral Transport Medium (VTM) were collected for this study,  
16 out of which 48 were from SARS-CoV-2 positive individuals (SARS-CoV-2 group) and 48  
17 samples were collected from Healthy control (RTPCR negative). These samples were collected  
18 by expert healthcare professionals while following the standard sample collection guidelines.  
19 The collected samples were maintained at  $4\text{ }^{\circ}\text{C} \leq 5$  days (Short-term storage) and at  $-80\text{ }^{\circ}\text{C}$  for  
20 the long term. Aliquots of these collected samples were then processed for SARS-CoV-2  
21 RTPCR testing under Biosafety level-II conditions. Samples with  $\leq 25$  cycle threshold value of  
22 SARS-CoV-2 target genes were considered positive samples.

23

### 24 **2.3. Metagenomic DNA Extraction, Library Preparation, and Metagenomic Sequencing**

25 The metagenomic DNA extraction was done using the QIAamp DNA Microbiome Kit (Catalog  
26 No. 51704). The DNA concentration was measured using a Qubit fluorometer. DNA purity was  
27 assessed using a Nanodrop spectrophotometer by analyzing the A260/280 and A260/230  
28 ratios. DNA libraries were prepared with the QIAseq FX DNA Library Preparation Kit.

1 Metagenomic next-generation sequencing (mNGS) was performed on the NextSeq550 platform  
2 using a 2x150 bp high-output kit, generating paired-end reads over 300 cycles.

3  
4  
5

#### 6 **2.4. Metagenomic Data Analysis**

7 Metagenomic data analysis was performed using the Chan Zuckerberg ID (CZID) web-based  
8 platform. Sequencing quality control was done by removing External RNA Controls Consortium  
9 (ERCC) sequences with Bowtie2 (Version 2.5.4)<sup>16</sup>. Sequencing adapters, short reads, low-  
10 quality sequences, and low-complexity regions were filtered using a customized fastp tool<sup>17</sup>.  
11 DNA sequences with quality scores < 17, reads shorter than 35 bp, high-complexity sequences  
12 > 40%, and > 15 undetermined bases were excluded.

13

14 The Host (Human) sequences were removed by aligning with Bowtie2 and HISAT2 against  
15 reference genomes<sup>18</sup>. CZID-dedup was used for 100% identical sequences till the first 70 base  
16 pairs. Only one representative read was retained. The STAR algorithm<sup>19</sup> was also used to  
17 remove duplicate, low-quality, and low-complexity host reads. Non-human reads were aligned to  
18 the NCBI nucleotide and protein databases (NCBI Index Date: 06-02-2024) using GSNAPL and  
19 RAPSearch. Post-filtering, sequences were aligned to the NCBI nucleotide (NT) database with  
20 Minimap2<sup>20</sup> and the NCBI protein (NR) database with Diamond<sup>21</sup>. Hits were annotated with  
21 accession numbers, and taxon counts were generated from GSNAP and RAPSearch results.

22

23 SPAdes was used for de novo (without reference) genome assembly. The original reads were  
24 mapped to assembled contigs with Bowtie2. BLAST analysis was then conducted on the contigs  
25 against the Nucleotide NT-BLAST database (GSNAP) and the Protein NR database  
26 (RAPSearch2).

27

#### 28 **2.5. AMR pipeline**

29 For AMR analysis CZID's AMR Pipeline v1.4.2<sup>22</sup> was used. AMR gene detection is performed  
30 using the Resistance Gene Identifier (RGI) tool. The Comprehensive Antibiotic Resistance  
31 Database (CARD) v3.2.6<sup>23</sup> was used to identify AMR genes and pathogen species. Contigs of  
32 AMR genes are assembled using SPAdes and aligned with CARD through BLAST for species  
33 identification. The result files generated from this pipeline contain detailed information on AMR  
34 genes, quality control metrics, and pathogen-of-origin detection.

1

## 2 **2.6. Statistical Analysis and Visualization**

3 Python 3.10.12 was used for statistical analysis and visualization. The analysis used the  
4 following Python packages: SciPy (version 1.13.1) for t-tests and ANOVA. statsmodels (version  
5 0.14.4) for regression models and hypothesis testing. scikit-learn (version 1.5.2) was used for  
6 PCA, PCoA, Multiple regression and additional statistical analysis. For data visualization,  
7 matplotlib (version 3.7.1) was used. Seaborn (version 0.13.2) was used for statistical  
8 visualizations with heatmaps and violin plots. Interactive visualizations like the Sankey diagram  
9 were created using Plotly (version 5.24.1). Data transformation tasks such as pivoting and log  
10 transformation were handled with Pandas (version 2.2.2). Statistical analysis was performed  
11 using numpy (version 1.26.4). The abundance metric of reads per million (RPM) was used for  
12 statistical analysis and data visualisation.

13

## 14 **3. Results**

### 15 **3.1. Summary of Sequencing Results**

16 Metagenomic sequencing of SARS-CoV-2 (48 samples) and Control (47 samples) groups was  
17 done using the Illumina NextSeq550 platform. The SARS-CoV-2 group generated an average of  
18  $7.26 \pm 1.52$  million reads, out of which 25% ( $1.78 \pm 0.56$  million reads) passed the human filter.  
19 The control group had generated average  $6.52 \pm 3.47$  million reads out of which 15% ( $0.78 \pm$   
20  $0.37$  million reads) passed the human filter. One sample from the control group was not  
21 included in the study due to quality check failure before sequencing.

22

### 23 **3.2. AMR Gene Alpha Diversity Analysis**

24 The violin plots (**Figure 1**) show that the SARS-CoV-2 group has significantly higher species  
25 richness than the control group. This is reflected by the Chao diversity index ( $p = 0.01651$ ),  
26 implying that the SARS-CoV-2 group harbors more distinct taxa. However, the Shannon and  
27 Simpson diversity indices show no significant differences between the groups ( $p = 0.98515$  and  
28  $p = 0.90225$ , respectively). This indicates that while the SARS-CoV-2 group has greater species  
29 richness, the overall distribution and balance of species abundances are similar to those in the  
30 control group.

31

### 32 **3.3. AMR Gene Beta Diversity: Bray-Curtis Dissimilarity and PCoA Analysis**

33 The Bray-Curtis dissimilarity heatmap (**Figure 2**) shows distinct clustering of SARS-CoV-2 (red  
34 sample tags) and control (blue sample tags) samples. Significant within-group similarity in both

1 groups was observed, as indicated by lighter shades. The higher dissimilarity between groups is  
2 seen in the off-diagonal regions. The diagonal line represents zero dissimilarity. The Bray-Curtis  
3 dissimilarity heatmap highlights clear within-group similarities and significant between-group  
4 differences in AMR profiles.

5  
6 **(Figure 3)** represents PCA (left) and PCoA (right) plots comparing SARS-CoV-2 (red) and  
7 Control (blue) groups. In the PCA plot, PC1 (77.90% variance) and PC2 (7.91% variance)  
8 reveal that the control group is tightly clustered near the origin. While, the SARS-CoV-2 group  
9 shows a greater spread along PC1. In the PCoA plot, Axis 1 (32.79% variance) and Axis 2  
10 (13.42% variance) show the control group forming a compact cluster. In contrast, the points in  
11 the SARS-CoV-2 group are more scattered. The groups are clearly distinct along Axis 1 in both  
12 plots, with SARS-CoV-2 exhibiting higher variations.

13  
14 **3.4. Differences in Resistome and Pathogen profiles among SARS-CoV-2 and Control**  
15 **Groups**

16 Antimicrobial resistance (AMR) gene abundance and pathogen profiles were significantly  
17 differing among the SARS-CoV-2 and control groups. **(Figure 4)** presents a heatmap of  
18 statistically significant ( $p < 0.05$ , Mann-Whitney) AMR genes. It was observed that the SARS-  
19 CoV-2 group exhibited a higher density and more consistent abundance of genes such as  
20 *mecA*, *blaOXA-48*, and *blaNDM-1*. Meanwhile, the control group showed sparse and less  
21 pronounced patterns of AMR gene abundance.

22 **(Figure 5)** shows species-specific resistome profiles using a heatmap visualization. Significant  
23 associations between AMR genes and microbial species were observed in the SARS-CoV-2  
24 group. Higher abundances of resistance genes were found in species such as *Klebsiella*  
25 *pneumoniae*, *Escherichia coli*, and *Staphylococcus aureus*. The control group exhibited weaker  
26 associations and lower resistance gene abundances. The AMR genes in the control group were  
27 primarily linked to species like *Acinetobacter baumannii* and *Pseudomonas aeruginosa*.

28 The Sankey diagram **(Figure 6)** showed the distribution of AMR genes within high-priority  
29 ESKAPE pathogens and their relative abundances among sample groups. Each ribbon  
30 represents an AMR gene, with the width proportional to its abundance (RPM). This reveals  
31 distinct differences in the distribution of AMR genes between the two groups. The SARS-CoV-2  
32 group showing a larger diversity and higher abundance of ESKAPE-associated AMR genes.

### 1 3.5. Differential Abundance of AMR Genes

2 The volcano plot (**Figure 7**) displays the differential abundance of AMR (antimicrobial  
3 resistance) genes between the SARS-CoV-2 and Control groups. This representation is based  
4 on log<sub>2</sub> fold change on (x-axis) and statistical significance (-log<sub>10</sub> p-value), on y-axis). Genes  
5 with log<sub>2</sub> fold change > 1 and Mann-Whitney p-values < 0.05 are highlighted in red as  
6 significant. Dashed lines in the figure represent thresholds for significance. Horizontal dashed  
7 line for the p-value (0.05) and vertical for log<sub>2</sub> fold change (±1). The results show that most of  
8 the statistically significant genes are more abundant in the SARS-CoV-2 group.

9

### 10 3.6. Bayesian Regression Analysis

11 The Shapiro-Wilk test confirms that the data is not normally distributed in both groups. For  
12 Control, the statistic is 0.108 (p = 2.76x10<sup>-49</sup>), and for SARS-CoV-2 data, the statistic is 0.136  
13 with (p 2.74x10<sup>-43</sup>). For Shapiro-Wilk p<0.05 indicates a non-normal distribution of the data.

14 These results align with the skewed distributions seen in the histograms and Q-Q plots (**Figure**  
15 **8**). Due to this non-normal distribution of data, the Bayesian regression model was used to  
16 examine the factors influencing antimicrobial resistance (AMR) gene abundance. The model  
17 has considered variables such as Sample Type (SARS-CoV-2 vs. Control), Collection Location,  
18 Host Sex, and Host Age. The model results showed that SARS-CoV-2 samples had significantly  
19 higher AMR gene abundance compared to control samples (β = 1.549, HDI [1.409, 1.691]).  
20 Females had significantly higher AMR gene abundance (β = 0.261, HDI [0.167, 0.350]) than  
21 males. The variable of host age showed no significant effect on AMR gene abundance. The  
22 model summary and categorical mappings are elaborated in (**Table 1**) Trace plots (**Figure 9**)  
23 showed good parameter mixing and no divergences. The posterior predictive checks confirmed  
24 the alignment between model predictions and observed data (**Figure 10**).

25

| Categories                  | mean   | SD    | hdi_2.5% | hdi_97.5% | mcse_mean | mcse_sd | ess_bulk | ess_tail | r_hat |
|-----------------------------|--------|-------|----------|-----------|-----------|---------|----------|----------|-------|
| Beta_Collection_Location[0] | -0.157 | 0.091 | -0.328   | 0.031     | 0.001     | 0.001   | 4719     | 2997     | 1     |
| Beta_Collection_Location[1] | -0.182 | 0.104 | -0.38    | 0.03      | 0.002     | 0.001   | 4634     | 3050     | 1     |
| Beta_Collection_Location[2] | -1.316 | 0.421 | -2.131   | -0.489    | 0.005     | 0.004   | 6093     | 2935     | 1     |
| Beta_Collection_Location[3] | -0.84  | 0.119 | -1.07    | -0.6      | 0.002     | 0.001   | 3881     | 2540     | 1     |
| Beta_Host_Age               | 0      | 0.001 | -0.003   | 0.002     | 0         | 0       | 3115     | 2795     | 1     |
| Beta_Host_Sex[0]            | 0.26   | 0.048 | 0.168    | 0.353     | 0.001     | 0       | 4800     | 2561     | 1     |

|                             |                                 |                      |        |        |       |       |      |      |   |
|-----------------------------|---------------------------------|----------------------|--------|--------|-------|-------|------|------|---|
| <b>Beta_Sample_Type[0]</b>  | 1.516                           | 0.051                | 1.415  | 1.612  | 0.001 | 0.001 | 4036 | 2833 | 1 |
| <b>Intercept</b>            | -0.489                          | 0.051                | -0.584 | -0.389 | 0.001 | 0.001 | 2892 | 2752 | 1 |
| <b>Sigma</b>                | 1.719                           | 0.015                | 1.69   | 1.75   | 0     | 0     | 4898 | 2618 | 1 |
| <b>Categorical Mappings</b> |                                 |                      |        |        |       |       |      |      |   |
| <b>Beta_Sample_Type</b>     | <b>Beta_Collection_Location</b> | <b>Beta_Host_Sex</b> |        |        |       |       |      |      |   |
| Control (Reference)         | Nagpur (Reference)              | Male (Reference)     |        |        |       |       |      |      |   |
| SARS-CoV-2 [0]              | Chandrapur [0]                  | Female [0]           |        |        |       |       |      |      |   |
|                             | Gadchiroli [1]                  |                      |        |        |       |       |      |      |   |
|                             | Wardha [2]                      |                      |        |        |       |       |      |      |   |
|                             | Bhandara [3]                    |                      |        |        |       |       |      |      |   |

1

2 **Table 1:** Summary of Bayesian regression model results for the effect of age, location, sex, and sample  
3 type on AMR gene abundance. Along with categorical mappings. Summary metrics include mean effects,  
4 standard deviation (SD), highest density intervals (HDI), Monte Carlo standard errors (MCSE), effective  
5 sample sizes (ESS), and convergence diagnostic (R-hat) to evaluate model reliability and convergence.

6

### 7 3.7. Antimicrobial Resistance Genes and Their Associated Drug Classes

8 The significant resistance genes as per volcano plot threshold ( $\log_2FC > 1$  and Mann-Whitney  
9 p-values  $< 0.05$ ) were analysed for their associated drug classes. The CARD database was  
10 used to attribute drug classes to gene families. The data includes 38 drug classes and 60  
11 unique resistance genes. Some drug classes were linked to multiple genes, such as  
12 aminoglycoside antibiotics, which include AAC(3)-IIc, AAC(3)-IIe, ANT(2'')-Ia, ANT(4')-Ib,  
13 APH(3'')-Ib, APH(6)-Id, and acrD. In contrast, others, like fluoroquinolone antibiotics and  
14 macrolide antibiotics, also have several resistance genes. Fewer genes represent drug classes  
15 such as mupirocin-like antibiotics and peptide antibiotics. Genes like TolC and MexB contribute  
16 to resistance within specific classes. **(Table 2)**

| S. No. | drug_class                                          | gene_name                                                                     | gene_count |
|--------|-----------------------------------------------------|-------------------------------------------------------------------------------|------------|
| 1      | aminocoumarin antibiotic                            | mdtA, mdtB, mdtC                                                              | 3          |
| 2      | aminoglycoside antibiotic                           | AAC(3)-IIc, AAC(3)-IIe, ANT(2'')-Ia, ANT(4')-Ib, APH(3'')-Ib, APH(6)-Id, acrD | 7          |
| 3      | aminoglycoside antibiotic; aminocoumarin antibiotic | baeS, cpxA                                                                    | 2          |
| 4      | disinfecting agents and antiseptics                 | OpmH, qacJ                                                                    | 2          |



|    |                                                                                                                                                                                                                                                                                                         |                                                                 |   |
|----|---------------------------------------------------------------------------------------------------------------------------------------------------------------------------------------------------------------------------------------------------------------------------------------------------------|-----------------------------------------------------------------|---|
| 5  | fluoroquinolone antibiotic                                                                                                                                                                                                                                                                              | emrA                                                            | 1 |
| 6  | fluoroquinolone antibiotic; aminoglycoside antibiotic                                                                                                                                                                                                                                                   | ceoB                                                            | 1 |
| 7  | fluoroquinolone antibiotic; aminoglycoside antibiotic; penam; tetracycline antibiotic; disinfecting agents and antiseptics                                                                                                                                                                              | mdeA                                                            | 1 |
| 8  | fluoroquinolone antibiotic; cephalosporin; glycylicycline; penam; tetracycline antibiotic; rifamycin antibiotic; phenicol antibiotic; disinfecting agents and antiseptics                                                                                                                               | acrB                                                            | 1 |
| 9  | fluoroquinolone antibiotic; cephalosporin; penam; tetracycline antibiotic; peptide antibiotic; disinfecting agents and antiseptics                                                                                                                                                                      | mgrA                                                            | 1 |
| 10 | fluoroquinolone antibiotic; diaminopyrimidine antibiotic; phenicol antibiotic                                                                                                                                                                                                                           | MexF                                                            | 1 |
| 11 | fluoroquinolone antibiotic; disinfecting agents and antiseptics                                                                                                                                                                                                                                         | norA                                                            | 1 |
| 12 | fluoroquinolone antibiotic; glycylicycline; tetracycline antibiotic; diaminopyrimidine antibiotic; nitrofurantoin antibiotic                                                                                                                                                                            | oqxB                                                            | 1 |
| 13 | fluoroquinolone antibiotic; tetracycline antibiotic; disinfecting agents and antiseptics                                                                                                                                                                                                                | MexI                                                            | 1 |
| 14 | glycylicycline; tetracycline antibiotic                                                                                                                                                                                                                                                                 | adeB                                                            | 1 |
| 15 | lincosamide antibiotic; streptogramin antibiotic; pleuromutilin antibiotic                                                                                                                                                                                                                              | IsaC                                                            | 1 |
| 16 | macrolide antibiotic; disinfecting agents and antiseptics                                                                                                                                                                                                                                               | Acinetobacter baumannii AmvA                                    | 1 |
| 17 | macrolide antibiotic; fluoroquinolone antibiotic; aminoglycoside antibiotic; carbapenem; cephalosporin; glycylicycline; cephamycin; penam; tetracycline antibiotic; peptide antibiotic; aminocoumarin antibiotic; rifamycin antibiotic; phenicol antibiotic; penem; disinfecting agents and antiseptics | TolC                                                            | 1 |
| 18 | macrolide antibiotic; fluoroquinolone antibiotic; aminoglycoside antibiotic; carbapenem; cephalosporin; penam; peptide antibiotic; penem                                                                                                                                                                | Klebsiella pneumoniae KpnH                                      | 1 |
| 19 | macrolide antibiotic; fluoroquinolone antibiotic; lincosamide antibiotic; carbapenem; cephalosporin; tetracycline antibiotic; rifamycin antibiotic; diaminopyrimidine antibiotic; phenicol antibiotic; penem                                                                                            | adeJ, adeK                                                      | 2 |
| 20 | macrolide antibiotic; fluoroquinolone antibiotic; monobactam; aminoglycoside antibiotic; carbapenem; cephalosporin; cephamycin; penam; tetracycline antibiotic; phenicol antibiotic; penem; disinfecting agents and antiseptics                                                                         | ParR                                                            | 1 |
| 21 | macrolide antibiotic; fluoroquinolone antibiotic; monobactam; carbapenem; cephalosporin; cephamycin; penam; tetracycline antibiotic; peptide antibiotic; aminocoumarin antibiotic; diaminopyrimidine antibiotic; sulfonamide antibiotic; phenicol antibiotic; penem                                     | MexB                                                            | 1 |
| 22 | macrolide antibiotic; fluoroquinolone antibiotic; penam                                                                                                                                                                                                                                                 | gadX, mdtE, mdtF                                                | 3 |
| 23 | macrolide antibiotic; fluoroquinolone antibiotic; penam; tetracycline antibiotic                                                                                                                                                                                                                        | evgS                                                            | 1 |
| 24 | macrolide antibiotic; fluoroquinolone antibiotic; tetracycline antibiotic; phenicol antibiotic; disinfecting agents and antiseptics                                                                                                                                                                     | MexW                                                            | 1 |
| 25 | macrolide antibiotic; lincosamide antibiotic; streptogramin antibiotic; streptogramin A antibiotic; streptogramin B antibiotic                                                                                                                                                                          | ErmB, ErmC                                                      | 2 |
| 26 | macrolide antibiotic; monobactam; tetracycline antibiotic; aminocoumarin antibiotic                                                                                                                                                                                                                     | MuxB                                                            | 1 |
| 27 | macrolide antibiotic; streptogramin antibiotic                                                                                                                                                                                                                                                          | msrE                                                            | 1 |
| 28 | macrolide antibiotic; tetracycline antibiotic; disinfecting agents and antiseptics                                                                                                                                                                                                                      | MexK                                                            | 1 |
| 29 | monobactam; cephalosporin; penam; penem                                                                                                                                                                                                                                                                 | TEM-116                                                         | 1 |
| 30 | mupirocin-like antibiotic                                                                                                                                                                                                                                                                               | Bifidobacterium bifidum ileS conferring resistance to mupirocin | 1 |
| 31 | nitroimidazole antibiotic                                                                                                                                                                                                                                                                               | msbA                                                            | 1 |
| 32 | nucleoside antibiotic; disinfecting agents and antiseptics                                                                                                                                                                                                                                              | mdtO, mdtP                                                      | 2 |
| 33 | peptide antibiotic                                                                                                                                                                                                                                                                                      | YojI, bacA, ugd                                                 | 3 |
| 34 | peptide antibiotic; aminocoumarin antibiotic; rifamycin antibiotic                                                                                                                                                                                                                                      | LptD                                                            | 1 |
| 35 | phenicol antibiotic                                                                                                                                                                                                                                                                                     | Agrobacterium fabrum chloramphenicol                            | 3 |

|    |                            |                                                                                      |   |
|----|----------------------------|--------------------------------------------------------------------------------------|---|
|    |                            | acetyltransferase, cmlA9, floR                                                       |   |
| 36 | phosphonic acid antibiotic | mdtG                                                                                 | 1 |
| 37 | rifamycin antibiotic       | Bifidobacterium adolescentis rpoB mutants conferring resistance to rifampicin, rpoB2 | 2 |
| 38 | tetracycline antibiotic    | emrY, tet(G), tet(Q)                                                                 | 3 |

1 **Table 2:** Significant AMR genes and their associated drug classes, highlighting genes contributing to  
2 resistance across multiple drug classes.

3

4

5

#### 6 **4. Discussion**

7 Multiple studies around the world have investigated the compositional dynamics of URT  
8 microbiome in SARS-CoV-2 infected individuals. These studies primarily focused on explaining  
9 the relationships between the URT microbiome composition and factors like disease severity,  
10 risk of developing secondary infections and utility of URT microbiome as a marker to predict  
11 disease outcomes.<sup>24,25,26</sup> It is now widely agreed upon that the SARS-CoV-2 infection have a  
12 role in altering the URT microbiome. However, the impact of infection on the AMR dynamics in  
13 the URT needs to be further looked into. Understanding the changes in AMR profiles in context  
14 with SARS-CoV-2 infection is significant for preventing secondary bacterial infection involving  
15 the lower respiratory tract and lungs. Understanding AMR dynamics could also be instrumental  
16 in devising effective therapeutics and management strategies for COVID-19 patients.

17

18 Stefanini et al. (2021)<sup>27</sup> (Hoque et al., 2021)<sup>28</sup> reported that SARS-CoV-2 infection is associated  
19 with higher diversity and increased abundance of AMR genes, suggesting a more complex  
20 microbial ecosystem or dysbiosis. The findings of our study also suggest that SARS-CoV-2  
21 infection could be linked with a higher diversity and abundance of AMR genes. The sequencing  
22 results indicated a substantial number of reads generated for both groups. However, filtering for  
23 human reads significantly reduced microbial reads, particularly in the control group. This  
24 reduction of microbial reads may indicate a less abundant microbial community in the URT. The  
25 higher number of microbial reads in the SARS-CoV-2 samples indicates towards a relatively  
26 complex microbial ecosystem in the URT or a potential dysbiosis of the host microbiome due to  
27 the viral infection.

28 The Chao1 index demonstrated that the SARS-CoV-2 group had a greater richness of AMR  
29 genes than the control group. This finding converges with previous studies indicating that viral

1 infections can influence the composition and diversity in the context of gut<sup>29</sup> and URT<sup>30</sup>  
2 microbiomes. The non-significant differences in the Shannon and Simpson indices suggest that  
3 the SARS-CoV-2 group has a diverse resistome, but the evenness of these distributions is  
4 similar to that of the control group. This finding indicates that the higher AMR richness in the  
5 SARS-CoV-2 group is not due to the skewed abundance of a few AMR genes.

6 Abundance of the antimicrobial resistance (AMR) genes substantially differed between SARS-  
7 COV-2 infected patients and the control group. PCA and PCoA analyses revealed distinct  
8 clustering between these two groups. Control samples exhibited lower variability in clustering,  
9 which suggests the presence of a stable and uniform resistome. Meanwhile, the SARS-CoV-2  
10 group displayed higher variability, suggesting an active alteration of the microbial communities  
11 within the infected patients due to secondary infections, antibiotic therapies, or changes in the  
12 microbiome due to the infection.

13 Bray-Curtis dissimilarity further indicated the separation between the two groups. The heatmap  
14 shows the significant impact of SARS-CoV-2 infection on microbial community composition and  
15 resistome profiles. The SARS-CoV-2 group exhibited a significantly higher abundance of critical  
16 AMR genes, such as *mecA*, *blaOXA-48*, and *blaNDM-1*. These genes confer resistance to key  
17 antibiotics like beta-lactams and carbapenems. Elevated abundance of these critical AMR  
18 genes raises concerns about potential multidrug-resistant secondary bacterial infections in  
19 COVID-19 patients.

20 Pathogen-specific AMR analysis using CARD revealed stronger associations of these AMR  
21 genes with pathogens such as *Klebsiella pneumoniae*, *Escherichia coli*, and *Staphylococcus*  
22 *aureus* in the URT of SARS-CoV-2 patients. This finding underscores the increased risk of  
23 secondary infections, exacerbated by prolonged hospital stays, invasive procedures like  
24 intubation, or immune dysregulation during SARS-CoV-2 infections. Meanwhile, in the control  
25 group, AMR genes were primarily linked to *Acinetobacter baumannii* and *Pseudomonas*  
26 *aeruginosa* but at lower abundances than the SARS-CoV-2 group.

27 Bayesian regression analysis showed that SARS-CoV-2 infection is an important factor  
28 contributing towards increased AMR gene abundance; this finding aligns with previous studies  
29 where SARS-CoV-2 patients showed elevated AMR profiles<sup>31,32,33</sup>. Intriguingly, the analysis  
30 identified higher AMR gene abundance in females than in males. This finding still leaves the  
31 scope for further validation through large-scale studies that incorporate the participants'

1 behavioural and socio-economic variables. It is also important to highlight that in India, females  
2 tend to self-medicate more as compared to males<sup>34,35</sup>. The observed higher prevalence of AMR  
3 in females could also be due to this behavioural pattern. In this study we did not observe  
4 significant age-associated variations in AMR abundance and diversity. Our findings diverge from  
5 previous studies where age is identified as a significant factor contributing to AMR diversity<sup>36,37</sup>.  
6 The age-related paradigms may further be explored in larger longitudinal studies specifically  
7 designed to ascertain these effects.

8 The resistome analysis also revealed broad resistance across multiple antibiotic classes,  
9 including aminoglycosides, macrolides, and fluoroquinolones. These findings highlight the  
10 complexities of managing secondary bacterial infections in COVID-19 patients, particularly in  
11 the context of multidrug-resistant pathogens.

12

## 13 **Conclusion**

14 The findings of this study highlight the need for monitoring the dynamics of AMR in SARS-CoV-  
15 2 patients. In clinical settings, secondary bacterial infections and multidrug-resistant pathogens  
16 make pandemics like COVID-19 difficult to manage. Policymakers should look forward to  
17 incorporate AMR surveillance into public health workflows. Sufficient resources must be  
18 allocated towards large-scale AMR surveillance in a populous and developing country like India.  
19 Collaboration among healthcare providers, researchers, and public health authorities is crucial  
20 to safeguarding the efficacy of antibiotic treatments and ensuring better patient outcomes.

## 21 **Limitations of the Study**

22 The cross-sectional study design limits the ability to understand temporal changes in AMR gene  
23 profiles. Additionally, the potential impacts of antibiotic usage on AMR profiles could not be  
24 assessed in this study, as this is a retrospective study and antibiotic usage data were not  
25 collected when the samples were originally obtained for SARS-CoV-2 genome surveillance  
26 under the INSACOG mandate.

27

28

1  
2  
3  
4  
5  
6  
7  
8  
9  
10  
11  
12  
13  
14  
15  
16  
17  
18  
19  
20  
21  
22  
23  
24  
25  
26  
27  
28  
29  
30

### Figure Legends

**Figure 1:** Chao1, Shannon, and Simpson Diversity of AMR Genes: Chao1 diversity (left), Shannon diversity (center), and Simpson diversity (right). Chao1 diversity ( $p=0.01651$ ), Shannon ( $p = 0.98515$ ), and Simpson ( $p = 0.90225$ )

**Figure 2:** Bray-Curtis Dissimilarity Heatmap: The heatmap shows SARS-CoV-2 samples (Sample IDs in red) and control samples (Sample IDs in blue). Red shades of heatmap represent dissimilarity, while blue represents similarity. The diagonal represents perfect similarity (self-comparison), indicated in dark blue.

**Figure 3:** PCA (left) and PCoA (right) plots showing the clustering of AMR gene profiles in control and SARS-CoV-2 groups. PCA (PC1: 77.90% variance) and PCoA (Axis 1: 32.79% variance) both show distinct separation between the groups.

**Figure 4:** Compositional Variations in the abundance of AMR Genes Among Control and SARS-CoV-2 Groups (Log-Transformed Significant Genes). Each row represents a distinct AMR gene, and each column represents a sample. The color intensity reflects gene abundance, with darker colors indicating higher abundance.

**Figure 5:** Variations in the Abundance of Species-associated AMR Genes Among Control and SARS-CoV-2 Groups (Log-Transformed) The heatmaps display log-transformed read counts per million (RPM).

1 **Figure 6:** Sankey Diagram Showing the Relationship Between High-Priority ESKAPE  
2 Pathogens and AMR Genes in SARS-CoV-2 and Control Groups. The width of the flows  
3 between species and AMR genes indicates the abundance in RPM.

4  
5 **Figure 7:** Volcano plot of AMR gene abundance changes between SARS-CoV-2 and control  
6 samples, based on a Mann-Whitney U test. The x-axis represents log<sub>2</sub> fold change (positive for  
7 SARS-CoV-2, negative for control), and the y-axis shows -log<sub>10</sub> p-values, with higher values  
8 indicating statistical significance. Points above the dashed line at -log<sub>10</sub>(0.05) are significant (p  
9 < 0.05). Gens with |log<sub>2</sub> fold change| > 1 and p-value < 0.05 are highlighted in red.

10  
11 **Figure 8:** Distributions of antimicrobial resistance gene families in control (top) and SARS-CoV-  
12 2 (bottom) groups. Histograms (left). Q-Q plots (right) reveal deviations from normality, with  
13 heavier tails in both groups.

14  
15 **Figure 9:** Left panels show posterior density estimates for coefficients:  
16 Beta\_Collection\_Location, Beta\_Host\_Age, Beta\_Host\_Sex, Beta\_Sample\_Type, Intercept, and  
17 Sigma. Solid lines indicate posterior densities, while dashed lines represent prior distributions.  
18 Right panels display corresponding trace plots of parameter values across iterations,  
19 demonstrating adequate mixing and convergence for all parameters.

20  
21 **Figure 10:** Posterior predictive check comparing observed data (black line) with the posterior  
22 predictive distribution (blue line) and its mean (orange dashed line). The alignment of the  
23 observed and predicted distributions indicates the model's ability to capture the underlying data  
24 trends.

25

26

27

28

29

30

31

1

2

3

4

5

6

### 7 **Data availability statement**

8 The data is available as supplementary data with the file name  
9 **“combined\_supplementary\_data”** Any additional data, if required, will be made available on  
10 request by the authors.

### 11 **Author declaration**

12 The authors assure that the research has followed all ethical guidelines and received approvals  
13 from the Institutional Ethics Committee for Research on Human Subjects (IEC) of CSIR-NEERI,  
14 Nagpur-20, India. Necessary consent from patients/participants has been obtained, and relevant  
15 institutional documentation has been archived.

### 16 **Confidentiality declaration**

17 Sample IDs (23G214-5G-264\_S1 to 23G214-5G-311\_S48 and 24D214-5G\_387\_S45 to  
18 24D214-5G\_434\_S91) are masked IDs and cannot be traced to participant details. The precise  
19 age of the participants is masked, and non-overlapping age ranges were used.

### 20 **Author contribution statement**

21 SST and KK have contributed equally to the conceptualization, experimentation, and data  
22 analysis of this study.

### 23 **Conflict of interest statement**

24 The authors declare no conflict of interest.

## 1 Acknowledgement

2 The authors are thankful to CSIR-NEERI for providing funds under project OLP-57 (March 2023  
3 -April 2024) for conducting this study. This manuscript has obtained the approval of the  
4 Knowledge Resource Center (KRC) publication committee of CSIR-NEERI (**KRC No.: CSIR-  
5 NEERI/KRC/2024/NOV/EPPM/1) Date: 14-11-2024**

6

7

## 8 References

- 9 1. Ramamurthy, T., Ghosh, A., Chowdhury, G., Mukhopadhyay, A. K., Dutta, S., & Miyoshi, S.  
10 (2022). Deciphering the genetic network and programmed regulation of antimicrobial resistance in  
11 bacterial pathogens. *Frontiers in Cellular and Infection Microbiology*, 12, 952491.  
12 <https://doi.org/10.3389/fcimb.2022.952491>
- 13 2. Kessler, C., Hou, J., Neo, O., & Buckner, M. (2022). In situ, in vivo, and in vitro approaches for  
14 studying AMR plasmid conjugation in the gut microbiome. *FEMS Microbiology Reviews*, 47.  
15 <https://doi.org/10.1093/femsre/fuac044>.
- 16 3. Boerlin, P., & Reid-Smith, R. (2008). Antimicrobial resistance: its emergence and transmission.  
17 *Animal Health Research Reviews*, 9, 115 - 126. <https://doi.org/10.1017/S146625230800159X>.
- 18 4. Hanada, S., Pirzadeh, M., Carver, K., & Deng, J. (2018). Respiratory Viral Infection-Induced  
19 Microbiome Alterations and Secondary Bacterial Pneumonia. *Frontiers in Immunology*, 9.  
20 <https://doi.org/10.3389/fimmu.2018.02640>.
- 21 5. Tan, K., Lim, R., Liu, J., Ong, H., Tan, V., Lim, H., Chung, K., Adcock, I., Chow, V., & Wang, D.  
22 (2020). Respiratory Viral Infections in Exacerbation of Chronic Airway Inflammatory Diseases:  
23 Novel Mechanisms and Insights From the Upper Airway Epithelium. *Frontiers in Cell and  
24 Developmental Biology*, 8. <https://doi.org/10.3389/fcell.2020.00099>.
- 25 6. Bottery, M., Pitchford, J., & Friman, V. (2020). Ecology and evolution of antimicrobial resistance in  
26 bacterial communities. *The ISME Journal*, 15, 939 - 948. [https://doi.org/10.1038/s41396-020-  
00832-7](https://doi.org/10.1038/s41396-020-<br/>27 00832-7).
- 28 7. Despotovic, M., De Nies, L., Busi, S. B., & Wilmes, P. (2023). Reservoirs of antimicrobial  
29 resistance in the context of One Health. *Current Opinion in Microbiology*, 73, 102291.  
30 <https://doi.org/10.1016/j.mib.2023.102291>
- 31 8. Segala, F. V., Bavaro, D. F., Di Gennaro, F., Salvati, F., Marotta, C., Saracino, A., Murri, R., &  
32 Fantoni, M. (2021). Impact of SARS-CoV-2 Epidemic on Antimicrobial Resistance: A Literature  
33 Review. *Viruses*, 13(11), 2110. <https://doi.org/10.3390/v13112110>



- 1 9. Sender, V., & Hentrich, K. (2021). Virus-Induced Changes of the Respiratory Tract Environment  
2 Promote Secondary Infections With *Streptococcus pneumoniae*. *Frontiers in Cellular and*  
3 *Infection Microbiology*, 11, 643326. <https://doi.org/10.3389/fcimb.2021.643326>
- 4 10. World Health Organization: WHO. (2024, April 26). WHO reports widespread overuse of  
5 antibiotics in patients hospitalized with COVID-19. World Health Organization.  
6 [https://www.who.int/news/item/26-04-2024-who-reports-widespread-overuse-of-antibiotics-in-](https://www.who.int/news/item/26-04-2024-who-reports-widespread-overuse-of-antibiotics-in-patients--hospitalized-with-covid-19#:~:text=Highest%20rate%20of%20antibiotic%20use,the%20African%20Region%20(79%25).)  
7 [patients--hospitalized-with-covid-](https://www.who.int/news/item/26-04-2024-who-reports-widespread-overuse-of-antibiotics-in-patients--hospitalized-with-covid-19#:~:text=Highest%20rate%20of%20antibiotic%20use,the%20African%20Region%20(79%25).)  
8 [19#:~:text=Highest%20rate%20of%20antibiotic%20use,the%20African%20Region%20\(79%25\).](https://www.who.int/news/item/26-04-2024-who-reports-widespread-overuse-of-antibiotics-in-patients--hospitalized-with-covid-19#:~:text=Highest%20rate%20of%20antibiotic%20use,the%20African%20Region%20(79%25).)
- 9 11. Fazel, P., Sedighian, H., Behzadi, E., Kachuei, R., & Fooladi, A. a. I. (2023). Interaction between  
10 SARS-COV-2 and pathogenic bacteria. *Current Microbiology*, 80(7).  
11 <https://doi.org/10.1007/s00284-023-03315-y>
- 12 12. Rehman, S. (2023). A parallel and silent emerging pandemic: Antimicrobial resistance (AMR)  
13 amid COVID-19 pandemic. *Journal of Infection and Public Health*, 16(4), 611–617.  
14 <https://doi.org/10.1016/j.jiph.2023.02.021>
- 15 13. Mac Aogáin, M., Lau, K. J. X., Cai, Z., Narayana, J. K., Purbojati, R. W., Drautz-Moses, D. I.,  
16 Gaultier, N. E., Jaggi, T. K., Tiew, P. Y., Ong, T. H., Koh, M. S., Hou, A. L. Y., Abisheganaden, J.  
17 A., Tsaneva-Atanasova, K., Schuster, S. C., & Chotirmall, S. H. (2020). Metagenomics reveals a  
18 core macrolide resistome related to microbiota in chronic respiratory disease. *American Journal*  
19 *of Respiratory and Critical Care Medicine*, 202(3), 433–447. [https://doi.org/10.1164/rccm.201911-](https://doi.org/10.1164/rccm.201911-2202oc)  
20 [2202oc](https://doi.org/10.1164/rccm.201911-2202oc)
- 21 14. Nath, S., Sarkar, M., Maddheshiya, A., De, D., Paul, S., Dey, S., Pal, K., Roy, S. K., Ghosh, A.,  
22 Sengupta, S., Paine, S. K., Biswas, N. K., Basu, A., & Mukherjee, S. (2023). Upper respiratory  
23 tract microbiome profiles in SARS-CoV-2 Delta and Omicron infected patients exhibit variant  
24 specific patterns and robust prediction of disease groups. *Microbiology Spectrum*, 11(6).  
25 <https://doi.org/10.1128/spectrum.02368-23>
- 26 15. QIASEq FX DNA Library Kit. (2023). Qiagen.com. [https://www.qiagen.com/zh-](https://www.qiagen.com/zh-us/products/discovery-and-translational-research/next-generation-sequencing/metagenomics/qiaseq-fx-dna-library-kit)  
27 [us/products/discovery-and-translational-research/next-generation-](https://www.qiagen.com/zh-us/products/discovery-and-translational-research/next-generation-sequencing/metagenomics/qiaseq-fx-dna-library-kit)  
28 [sequencing/metagenomics/qiaseq-fx-dna-library-kit](https://www.qiagen.com/zh-us/products/discovery-and-translational-research/next-generation-sequencing/metagenomics/qiaseq-fx-dna-library-kit)
- 29 16. Langmead, B., & Salzberg, S. L. (2012). Fast gapped-read alignment with Bowtie 2. *Nature*  
30 *Methods*, 9(4), 357-359. <https://doi.org/10.1038/nmeth.1923>
- 31 17. Chen, S. (2023). Ultrafast one-pass FASTQ data preprocessing, quality control, and  
32 deduplication using fastp. *IMeta*, 2(2), e107. <https://doi.org/10.1002/imt2.107>
- 33 18. Kim, D., Paggi, J. M., Park, C., Bennett, C., & Salzberg, S. L. (2019). Graph-based genome  
34 alignment and genotyping with HISAT2 and HISAT-genotype. *Nature Biotechnology*, 37(8), 907-  
35 915. <https://doi.org/10.1038/s41587-019-0201-4>

- 1 19. Dobin, A., Davis, C. A., Schlesinger, F., Drenkow, J., Zaleski, C., Jha, S., Batut, P., Chaisson, M.,  
2 & Gingeras, T. R. (2012). STAR: ultrafast universal RNA-seq aligner. *Bioinformatics*, 29(1), 15–  
3 21. <https://doi.org/10.1093/bioinformatics/bts635>
- 4 20. Li, H. (2018). Minimap2: Pairwise alignment for nucleotide sequences. *Bioinformatics*, 34(18),  
5 3094-3100. <https://doi.org/10.1093/bioinformatics/bty191>
- 6 21. Buchfink, B., Xie, C., & Huson, D. H. (2014). Fast and sensitive protein alignment using  
7 DIAMOND. *Nature Methods*, 12(1), 59-60. <https://doi.org/10.1038/nmeth.3176>
- 8 22. Langelier, C., Lu, D., Kalantar, K., Chu, V., Glascock, A., Guerrero, E., Bernick, N., Butcher, X.,  
9 Ewing, K., Fahsbender, E., Holmes, O., Hoops, E., Jones, A., Lim, R., McCanny, S., Reynoso, L.,  
10 Rosario, K., Tang, J., Valenzuela, O., . . . McArthur, A. (2024). Simultaneous detection of  
11 pathogens and antimicrobial resistance genes with the open source, cloud-based, CZ ID pipeline.  
12 *Research Square (Research Square)*. <https://doi.org/10.21203/rs.3.rs-4271356/v1>
- 13 23. Alcock, B. P., Huynh, W., Chalil, R., Smith, K. W., Raphenya, A. R., Wlodarski, M. A.,  
14 Edalatmand, A., Petkau, A., Syed, S. A., Tsang, K. K., Baker, S. J. C., Dave, M., McCarthy, M.  
15 C., Mukiri, K. M., Nasir, J. A., Golbon, B., Imtiaz, H., Jiang, X., Kaur, K., . . . McArthur, A. G.  
16 (2022). CARD 2023: expanded curation, support for machine learning, and resistome prediction  
17 at the Comprehensive Antibiotic Resistance Database. *Nucleic Acids Research*, 51(D1), D690–  
18 D699. <https://doi.org/10.1093/nar/gkac920>
- 19 24. De Maio, F., Posteraro, B., Ponziani, F. R., Cattani, P., Gasbarrini, A., & Sanguinetti, M. (2020).  
20 Nasopharyngeal microbiota profiling of SARS-COV-2 infected patients. *Biological Procedures*  
21 *Online*, 22(1). <https://doi.org/10.1186/s12575-020-00131-7>
- 22 25. Rhoades, N. S., Pinski, A. N., Monsibais, A. N., Jankeel, A., Doratt, B. M., Cinco, I. R., Ibraim, I.,  
23 & Messaoudi, I. (2021). Acute SARS-CoV-2 infection is associated with an increased abundance  
24 of bacterial pathogens, including *Pseudomonas aeruginosa* in the nose. *Cell Reports*, 36(9),  
25 109637. <https://doi.org/10.1016/j.celrep.2021.109637>
- 26 26. Ventero, M. P., Moreno-Perez, O., Molina-Pardines, C., Paytuví-Gallart, A., Boix, V., Escribano,  
27 I., Galan, I., González-delaAleja, P., López-Pérez, M., Sánchez-Martínez, R., Merino, E., &  
28 Rodríguez, J. C. (2022). Nasopharyngeal Microbiota as an early severity biomarker in COVID-19  
29 hospitalised patients. *Journal of Infection*, 84(3), 329-336.  
30 <https://doi.org/10.1016/j.jinf.2021.12.030>
- 31 27. Stefanini, I., De Renzi, G., Foddai, E., Cordani, E., & Mognetti, B. (2021). Profile of Bacterial  
32 Infections in COVID-19 Patients: Antimicrobial Resistance in the Time of SARS-CoV-2. *Biology*,  
33 10(9), 822. <https://doi.org/10.3390/biology10090822>
- 34 28. Hoque, M. N., Sarkar, M. M., Rahman, M. S., Akter, S., Banu, T. A., Goswami, B., Jahan, I.,  
35 Hossain, M. S., Shamsuzzaman, A. K., Nafisa, T., Molla, M. M., Yeasmin, M., Ghosh, A. K.,  
36 Osman, E., Alam, S. K., Uzzaman, M. S., Habib, M. A., Mahmud, A. S., Crandall, K. A., . . .  
37 Khan, M. S. (2021). SARS-CoV-2 infection reduces human nasopharyngeal commensal

- 1 microbiome with inclusion of pathobionts. *Scientific Reports*, 11(1), 1-17.  
2 <https://doi.org/10.1038/s41598-021-03245-4>
- 3 29. Li, J., Jing, Q., Li, J., Hua, M., Di, L., Song, C., Huang, Y., Wang, J., Chen, C., & Wu, A. R.  
4 (2023). Assessment of microbiota in the gut and upper respiratory tract associated with SARS-  
5 CoV-2 infection. *Microbiome*, 11(1). <https://doi.org/10.1186/s40168-022-01447-0>
- 6 30. Shilts, M. H., Rosas-Salazar, C., Strickland, B. A., Kimura, K. S., Asad, M., Sehanobish, E.,  
7 Freeman, M. H., Wessinger, B. C., Gupta, V., Brown, H. M., Boone, H. H., Patel, V., Barbi, M.,  
8 Bottalico, D., O'Neill, M., Akbar, N., Rajagopala, S. V., Mallal, S., Phillips, E., . . . Das, S. R.  
9 (2022). Severe COVID-19 is associated with an altered upper respiratory tract microbiome.  
10 *Frontiers in Cellular and Infection Microbiology*, 11. <https://doi.org/10.3389/fcimb.2021.781968>
- 11 31. Bauer, K., Puzniak, L., Yu, K., Klinker, K., Watts, J., Moise, P., Finelli, L., Ai, C., & Gupta, V.  
12 (2022). A Multicenter Comparison of Prevalence and Predictors of Antimicrobial Resistance in  
13 Hospitalized Patients Before and During the Severe Acute Respiratory Syndrome Coronavirus 2  
14 Pandemic. *Open Forum Infectious Diseases*, 9. <https://doi.org/10.1093/ofid/ofac537>.
- 15 32. Kariyawasam, R., Julien, D., Jelinski, D., Larose, S., Rennert-May, E., Conly, J., Dingle, T., Chen,  
16 J., Tyrrell, G., Ronksley, P., & Barkema, H. (2021). Antimicrobial resistance (AMR) in COVID-19  
17 patients: a systematic review and meta-analysis (November 2019–June 2021). *Antimicrobial  
18 Resistance and Infection Control*, 11. <https://doi.org/10.1186/s13756-022-01085-z>.
- 19 33. Saini, V., Jain, C., Singh, N., Alsulimani, A., Gupta, C., Dar, S., Haque, S., & Das, S. (2021).  
20 Paradigm Shift in Antimicrobial Resistance Pattern of Bacterial Isolates during the COVID-19  
21 Pandemic. *Antibiotics*, 10. <https://doi.org/10.3390/antibiotics10080954>.
- 22 34. Juneja, K., Chauhan, A., Shree, T., Roy, P., Bardhan, M., Ahmad, A., Pawaiya, A. S., & Anand,  
23 A. (2024). Self-medication prevalence and associated factors among adult population in Northern  
24 India: A community-based cross-sectional study. *SAGE Open Medicine*.  
25 <https://doi.org/10.1177/20503121241240507>
- 26 35. Rathod, P., Sharma, S., Ukey, U., Sonpimpale, B., Ughade, S., Narlawar, U., Gaikwad, S., Nair,  
27 P., Masram, P., & Pandey, S. (2023). Prevalence, Pattern, and Reasons for Self-Medication: A  
28 Community-Based Cross-Sectional Study From Central India. *Cureus*, 15(1), e33917.  
29 <https://doi.org/10.7759/cureus.33917>
- 30 36. Chu, V., Kalantar, K., Mick, E., Tsitsiklis, A., Spottiswoode, N., Derisi, J., Ambroggio, L., Mourani,  
31 P., & Langelier, C. (2023). Antimicrobial Resistance in the Upper Respiratory Tract of Children  
32 Compared with Adults. *Journal of the Pediatric Infectious Diseases Society*.  
33 <https://doi.org/10.1093/jpids/piad070.005>.
- 34 37. Langelier, C., Chu, V., Tsitsiklis, A., Mick, E., Ambroggio, L., Kalantar, K., Glascock, A., Osborne,  
35 C., Wagner, B., Matthay, M., Derisi, J., Calfee, C., & Mourani, P. (2023). The antibiotic resistance  
36 reservoir of the lung microbiome expands with age. *Research Square*.  
37 <https://doi.org/10.21203/rs.3.rs-3283415/v1>.

### Chao Diversity Index

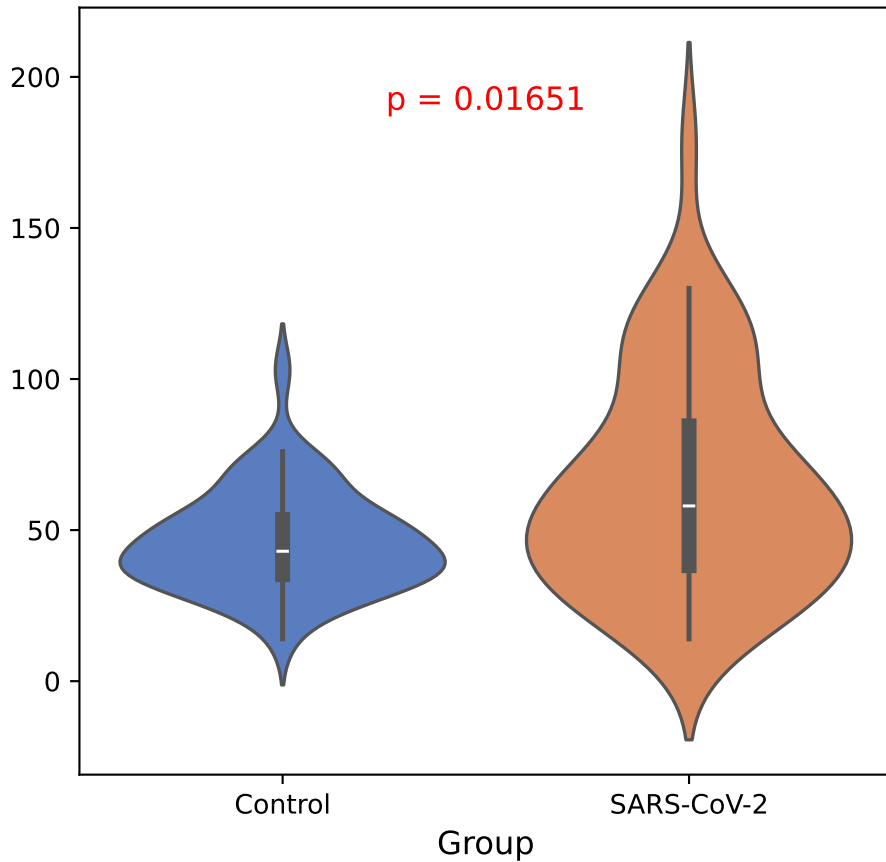

### Shannon Diversity Index

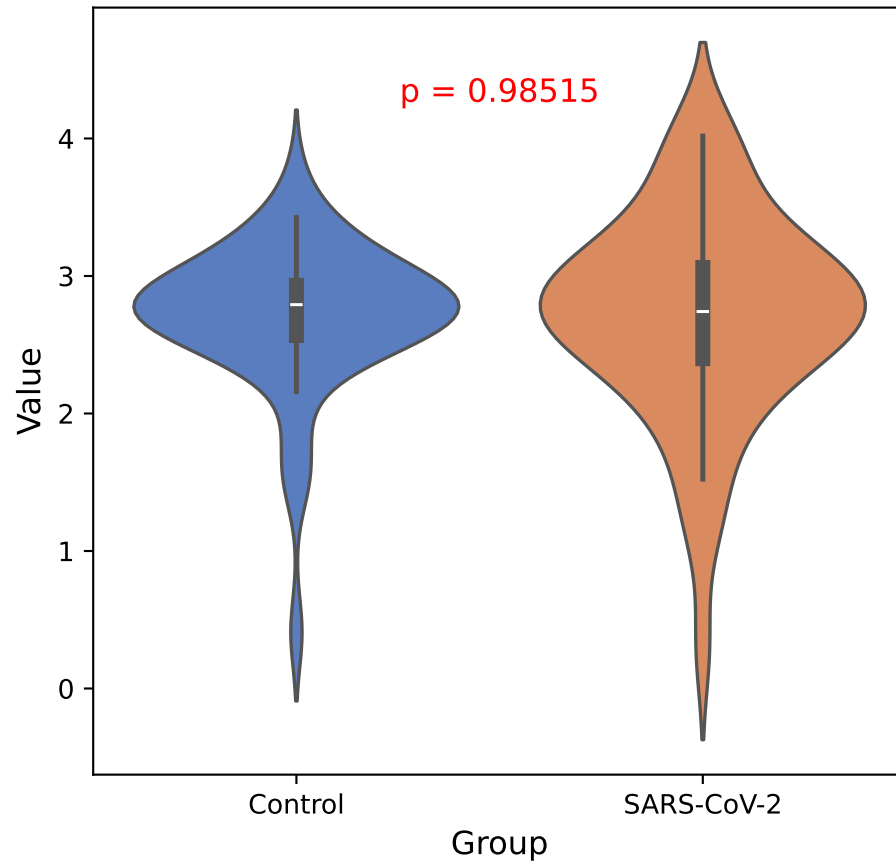

### Simpson Diversity Index

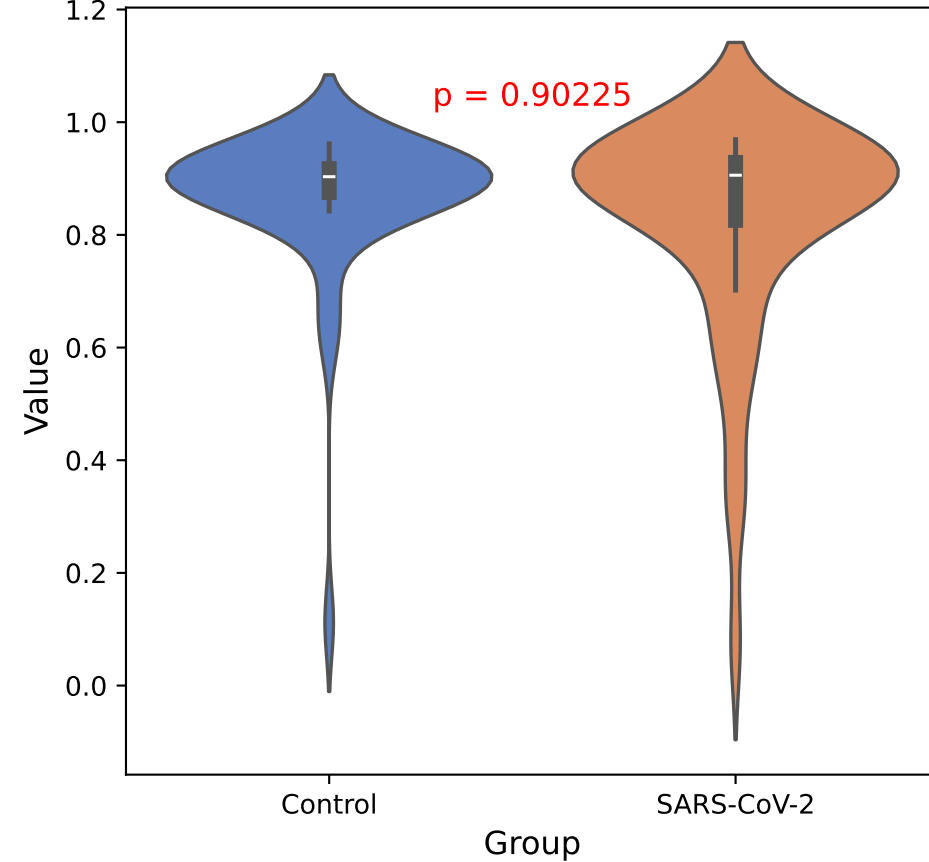

Bray-Curtis Dissimilarity Heatmap

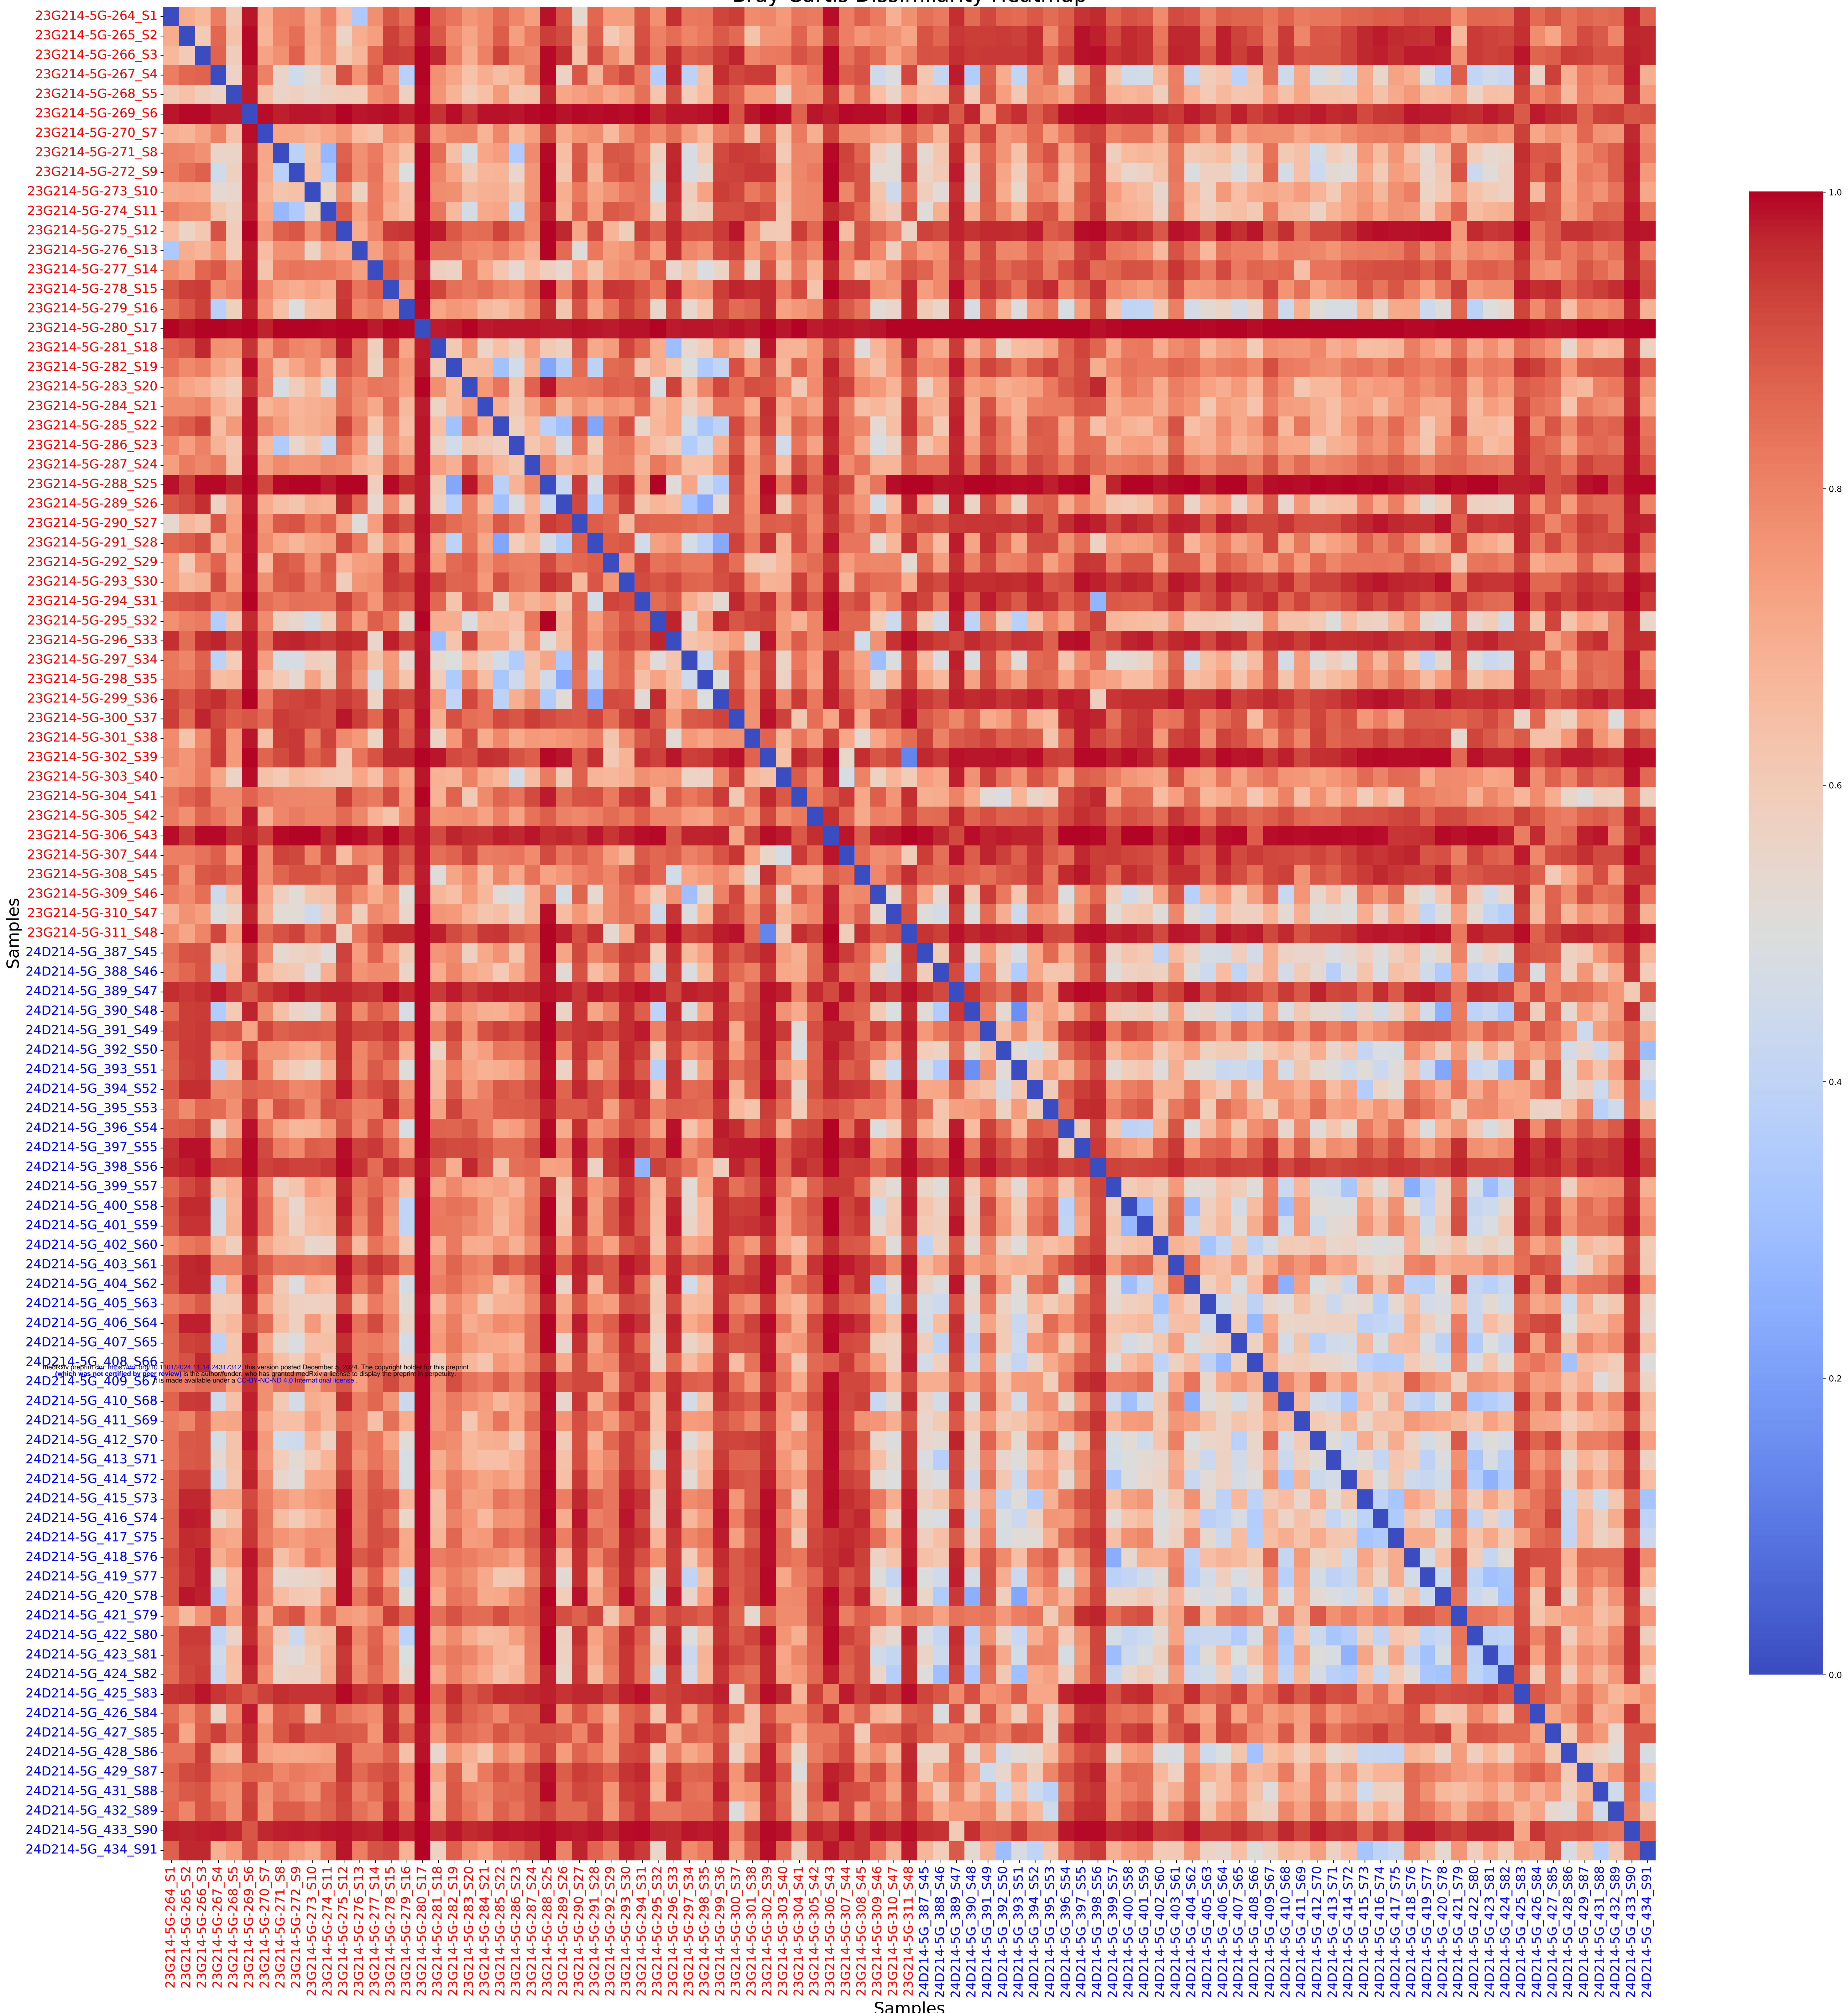

bioRxiv preprint doi: <https://doi.org/10.1101/2024.11.08.24317312>; this version posted December 6, 2024. The copyright holder for this preprint (which was not certified by peer review) is the author/funder, who has granted bioRxiv a license to display the preprint in perpetuity. It is made available under aCC-BY-NC-ND 4.0 International license.

Samples

Samples

PCA Plot

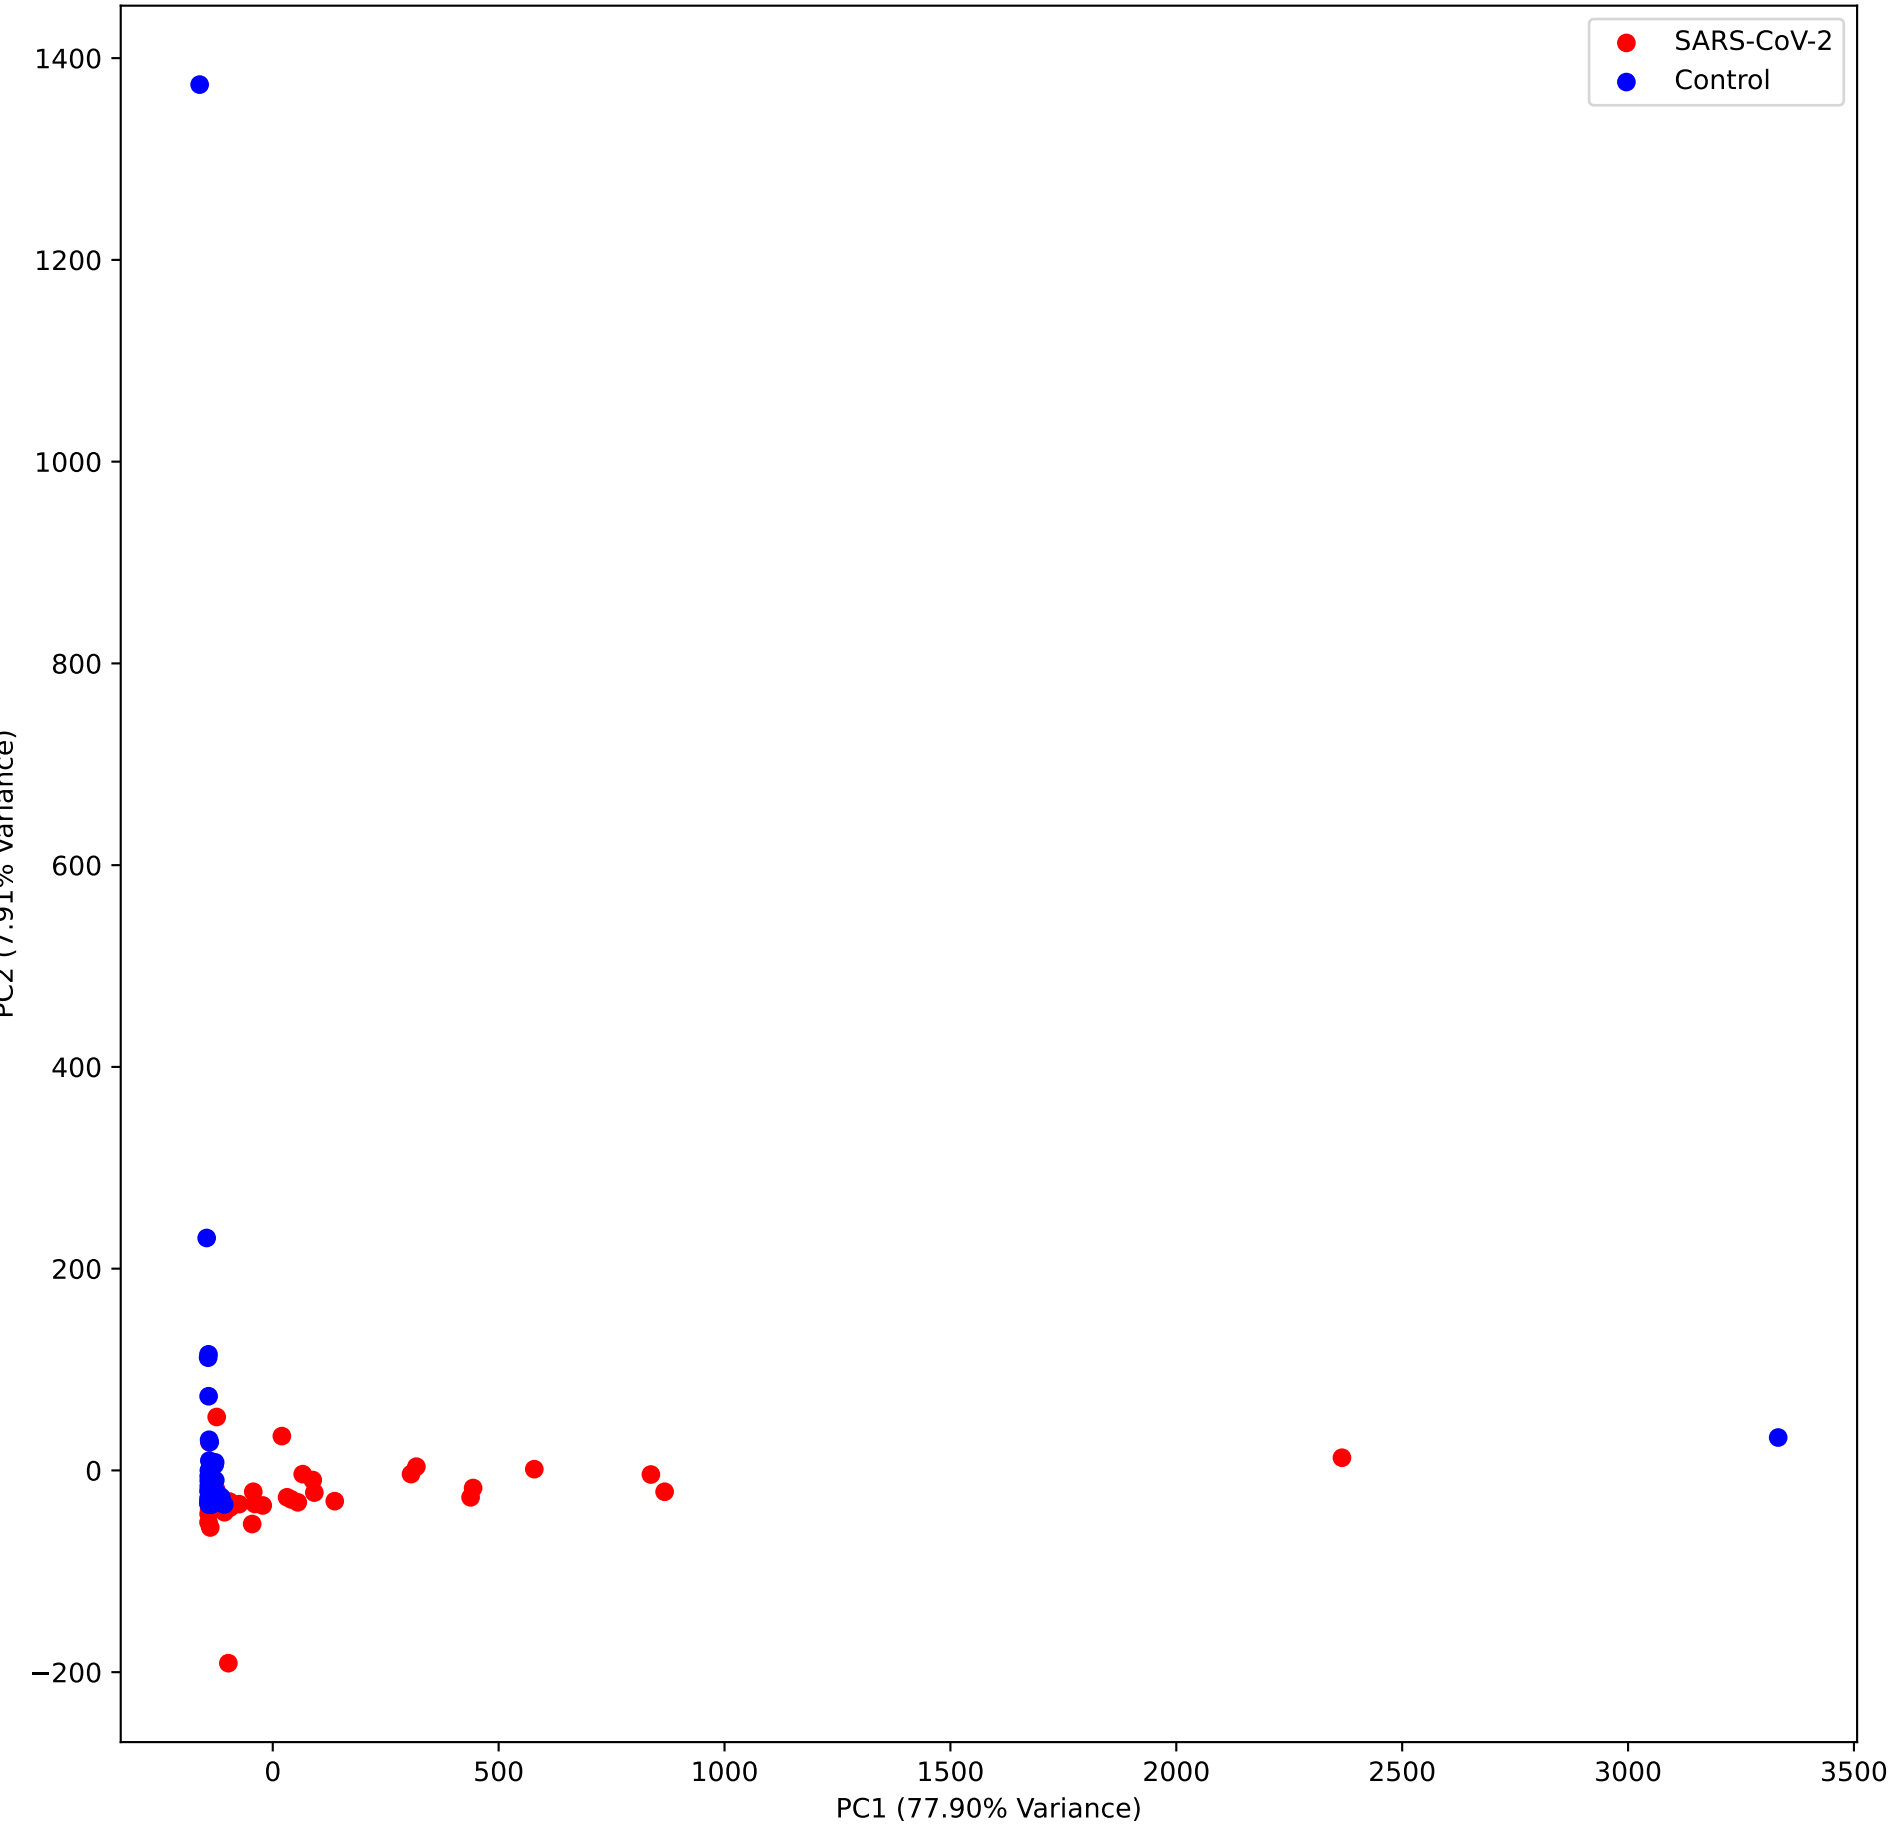

PCoA Plot

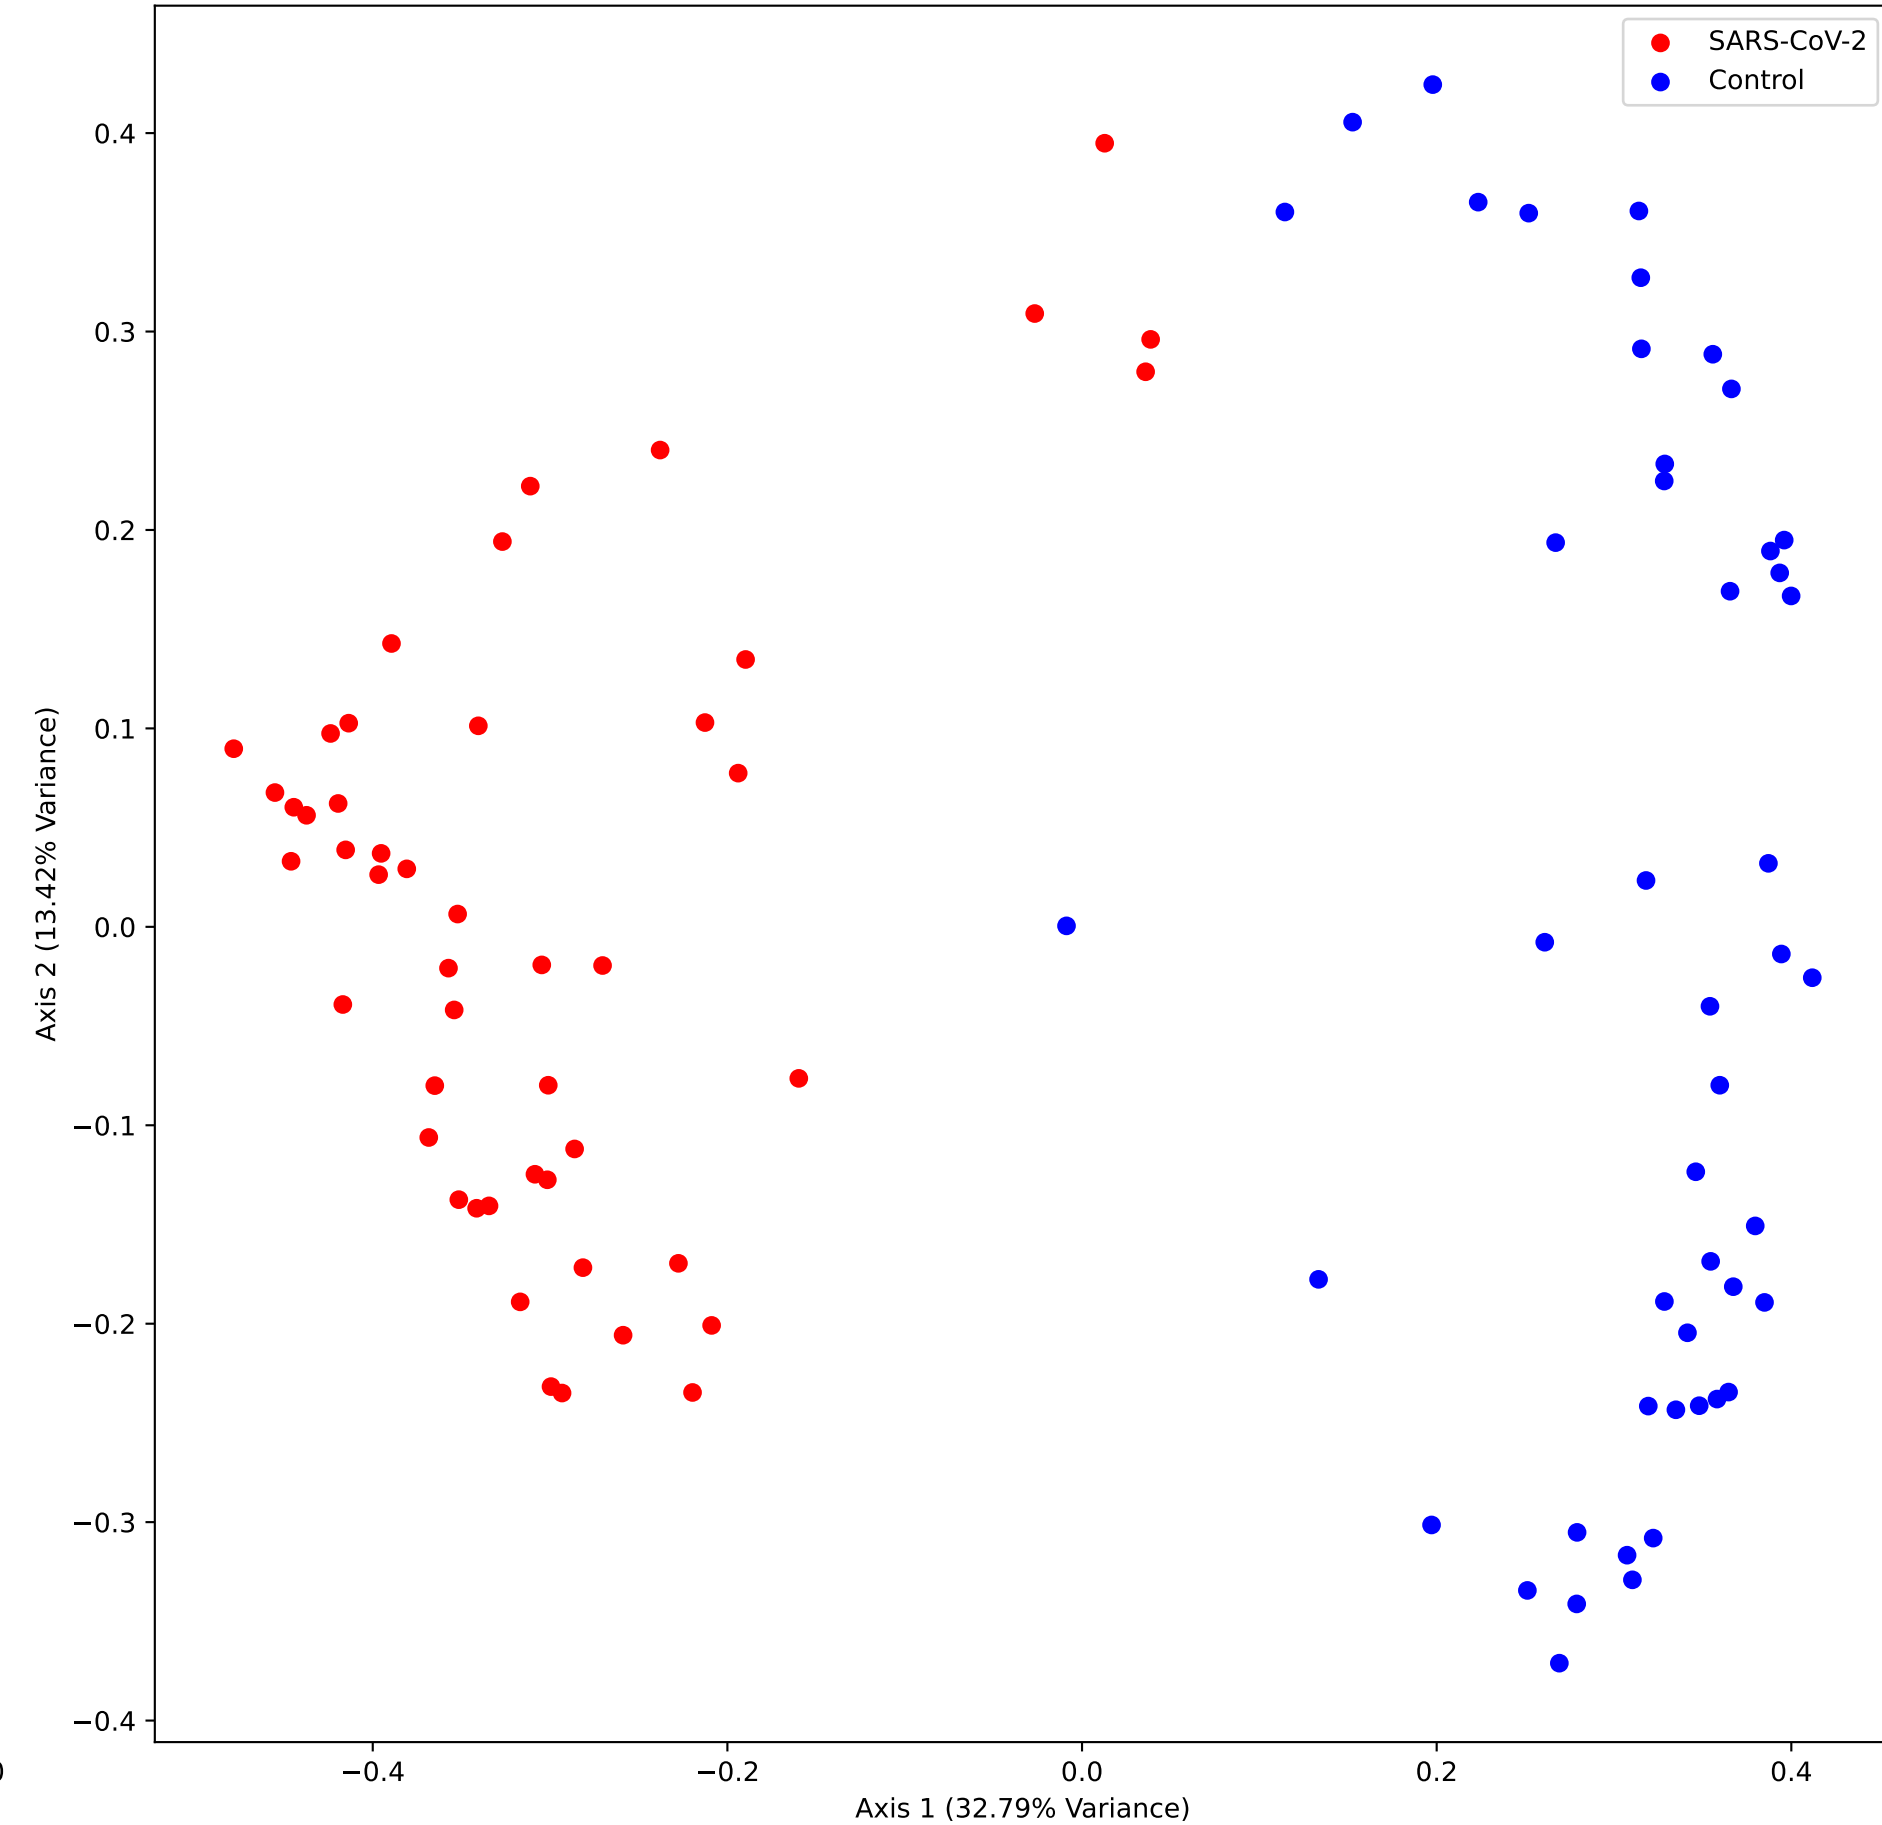

Log-Transformed Gene Abundance (SARS-CoV-2)

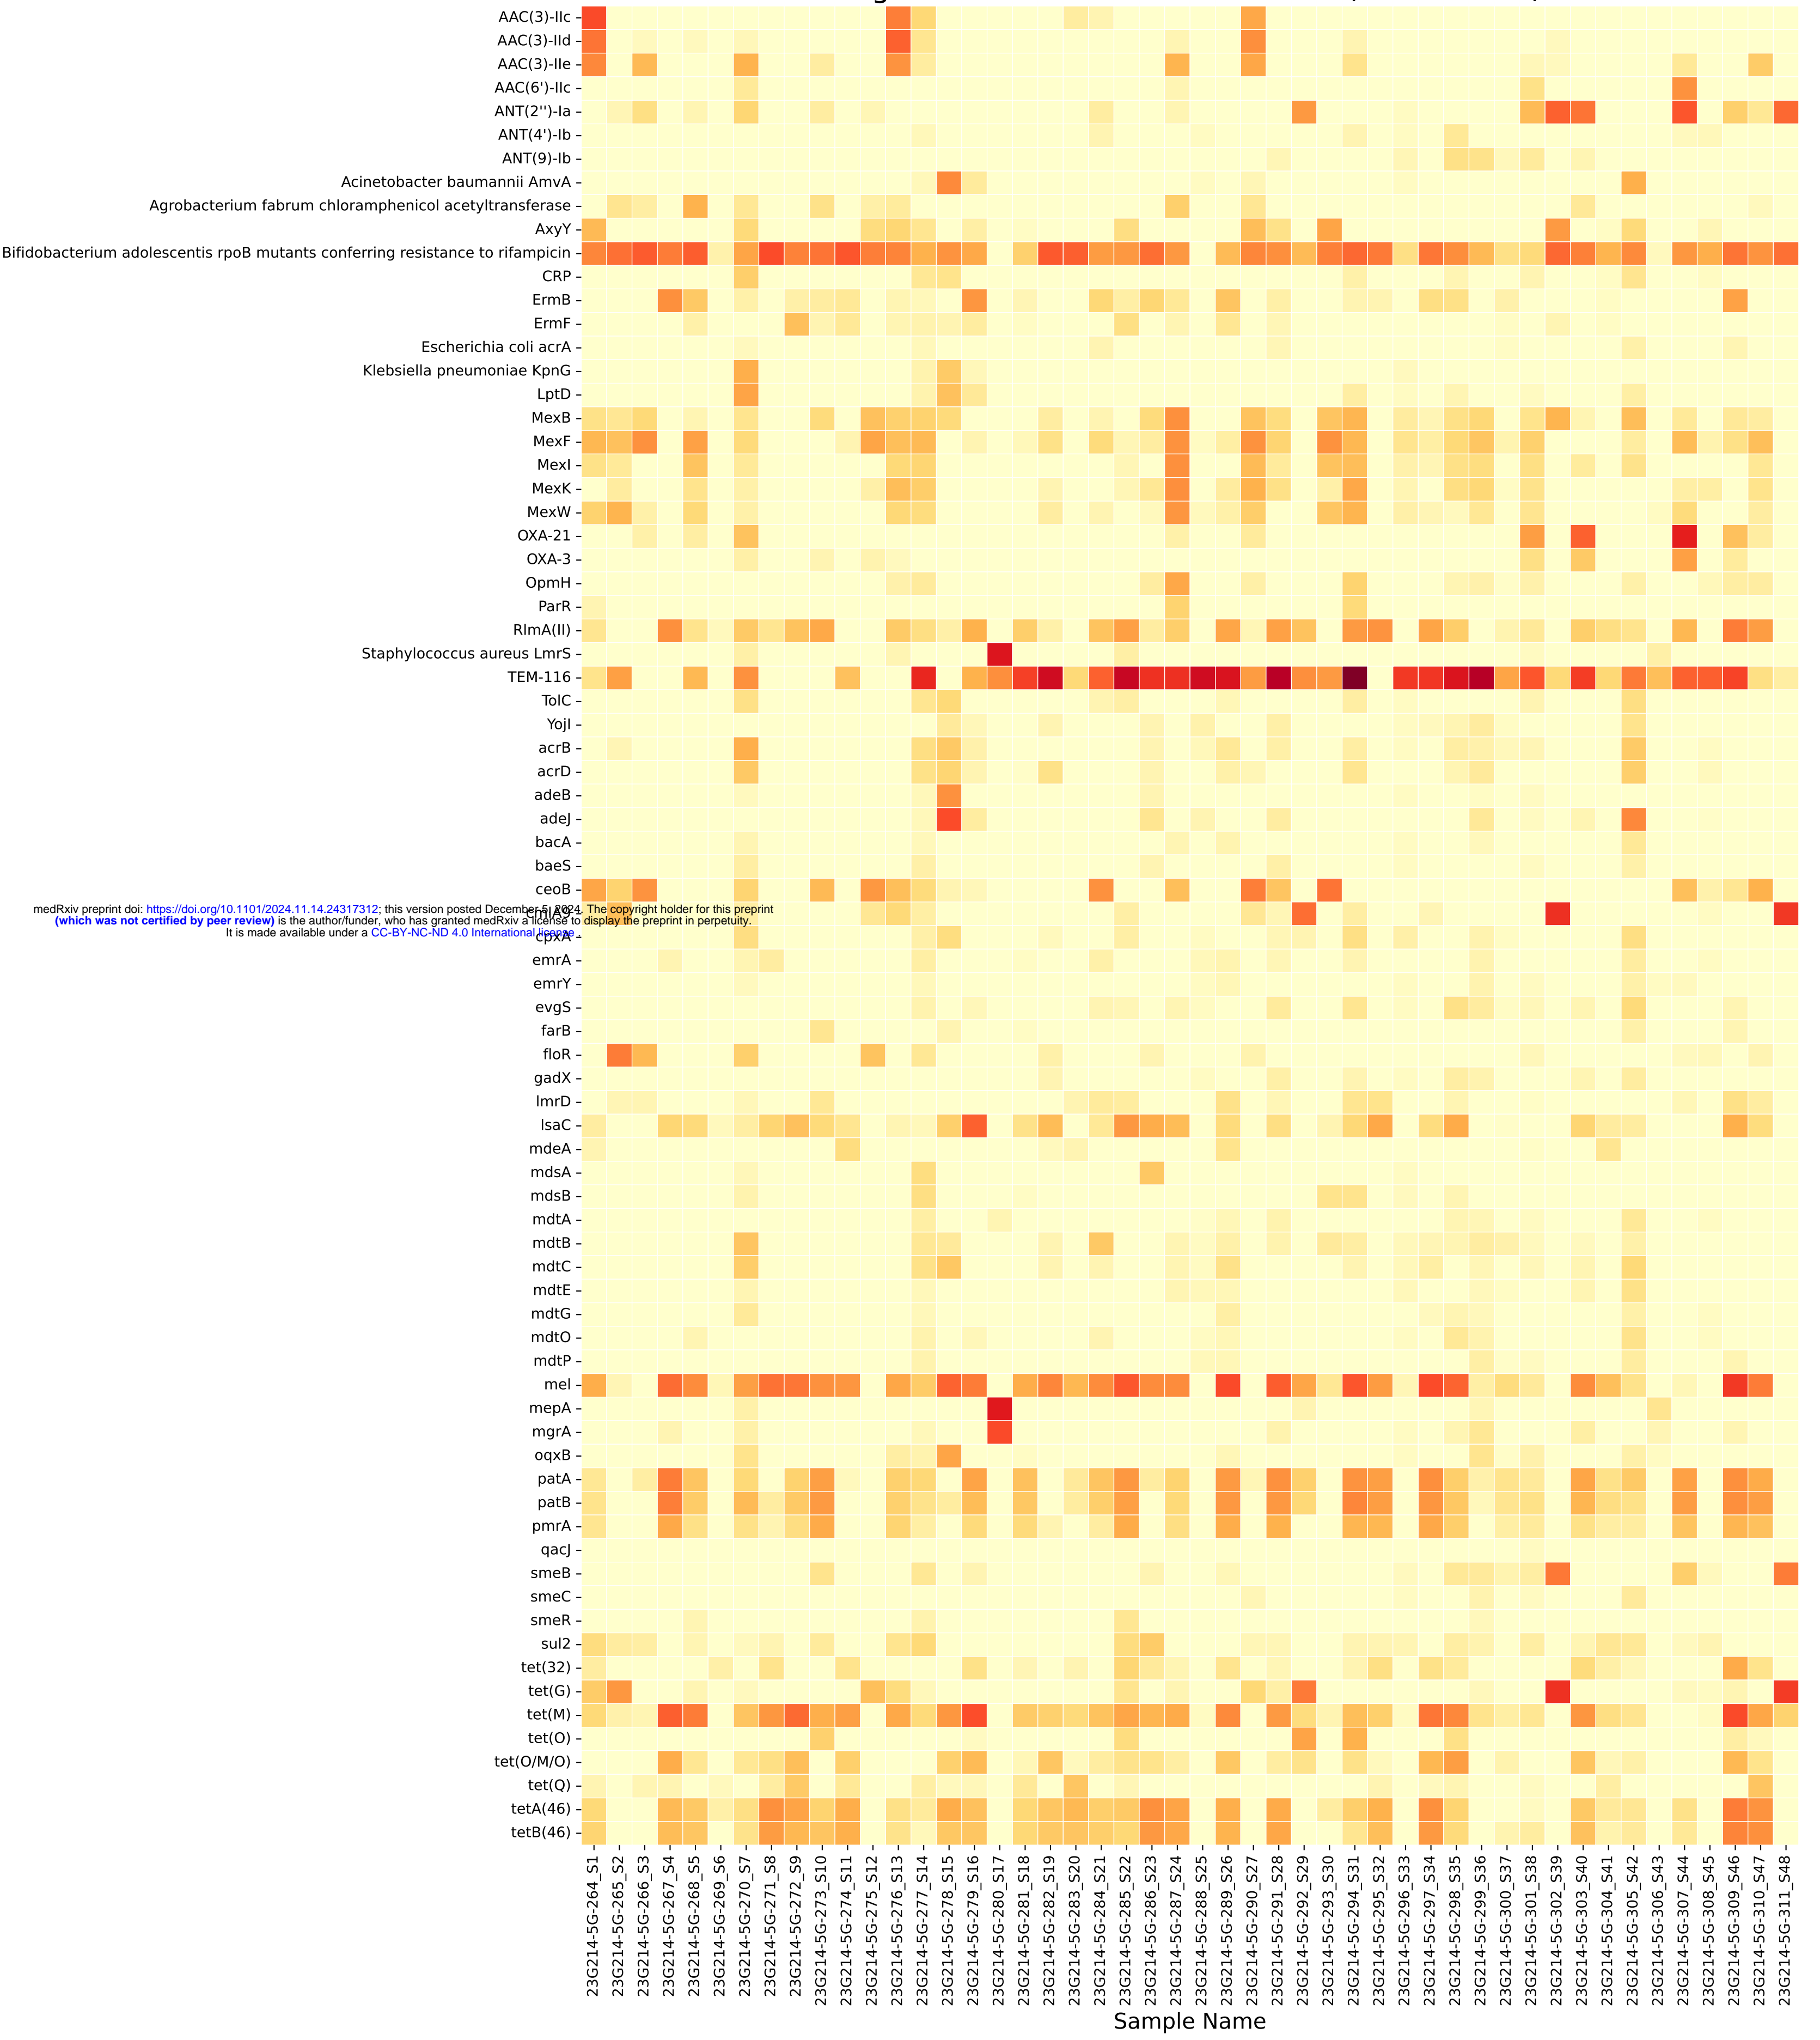

medRxiv preprint doi: <https://doi.org/10.1101/2024.11.14.24317312>; this version posted December 11, 2024. The copyright holder for this preprint (which was not certified by peer review) is the author/funder, who has granted medRxiv a license to display the preprint in perpetuity. It is made available under a CC-BY-NC-ND 4.0 International license.

Log-Transformed Gene Abundance (Control)

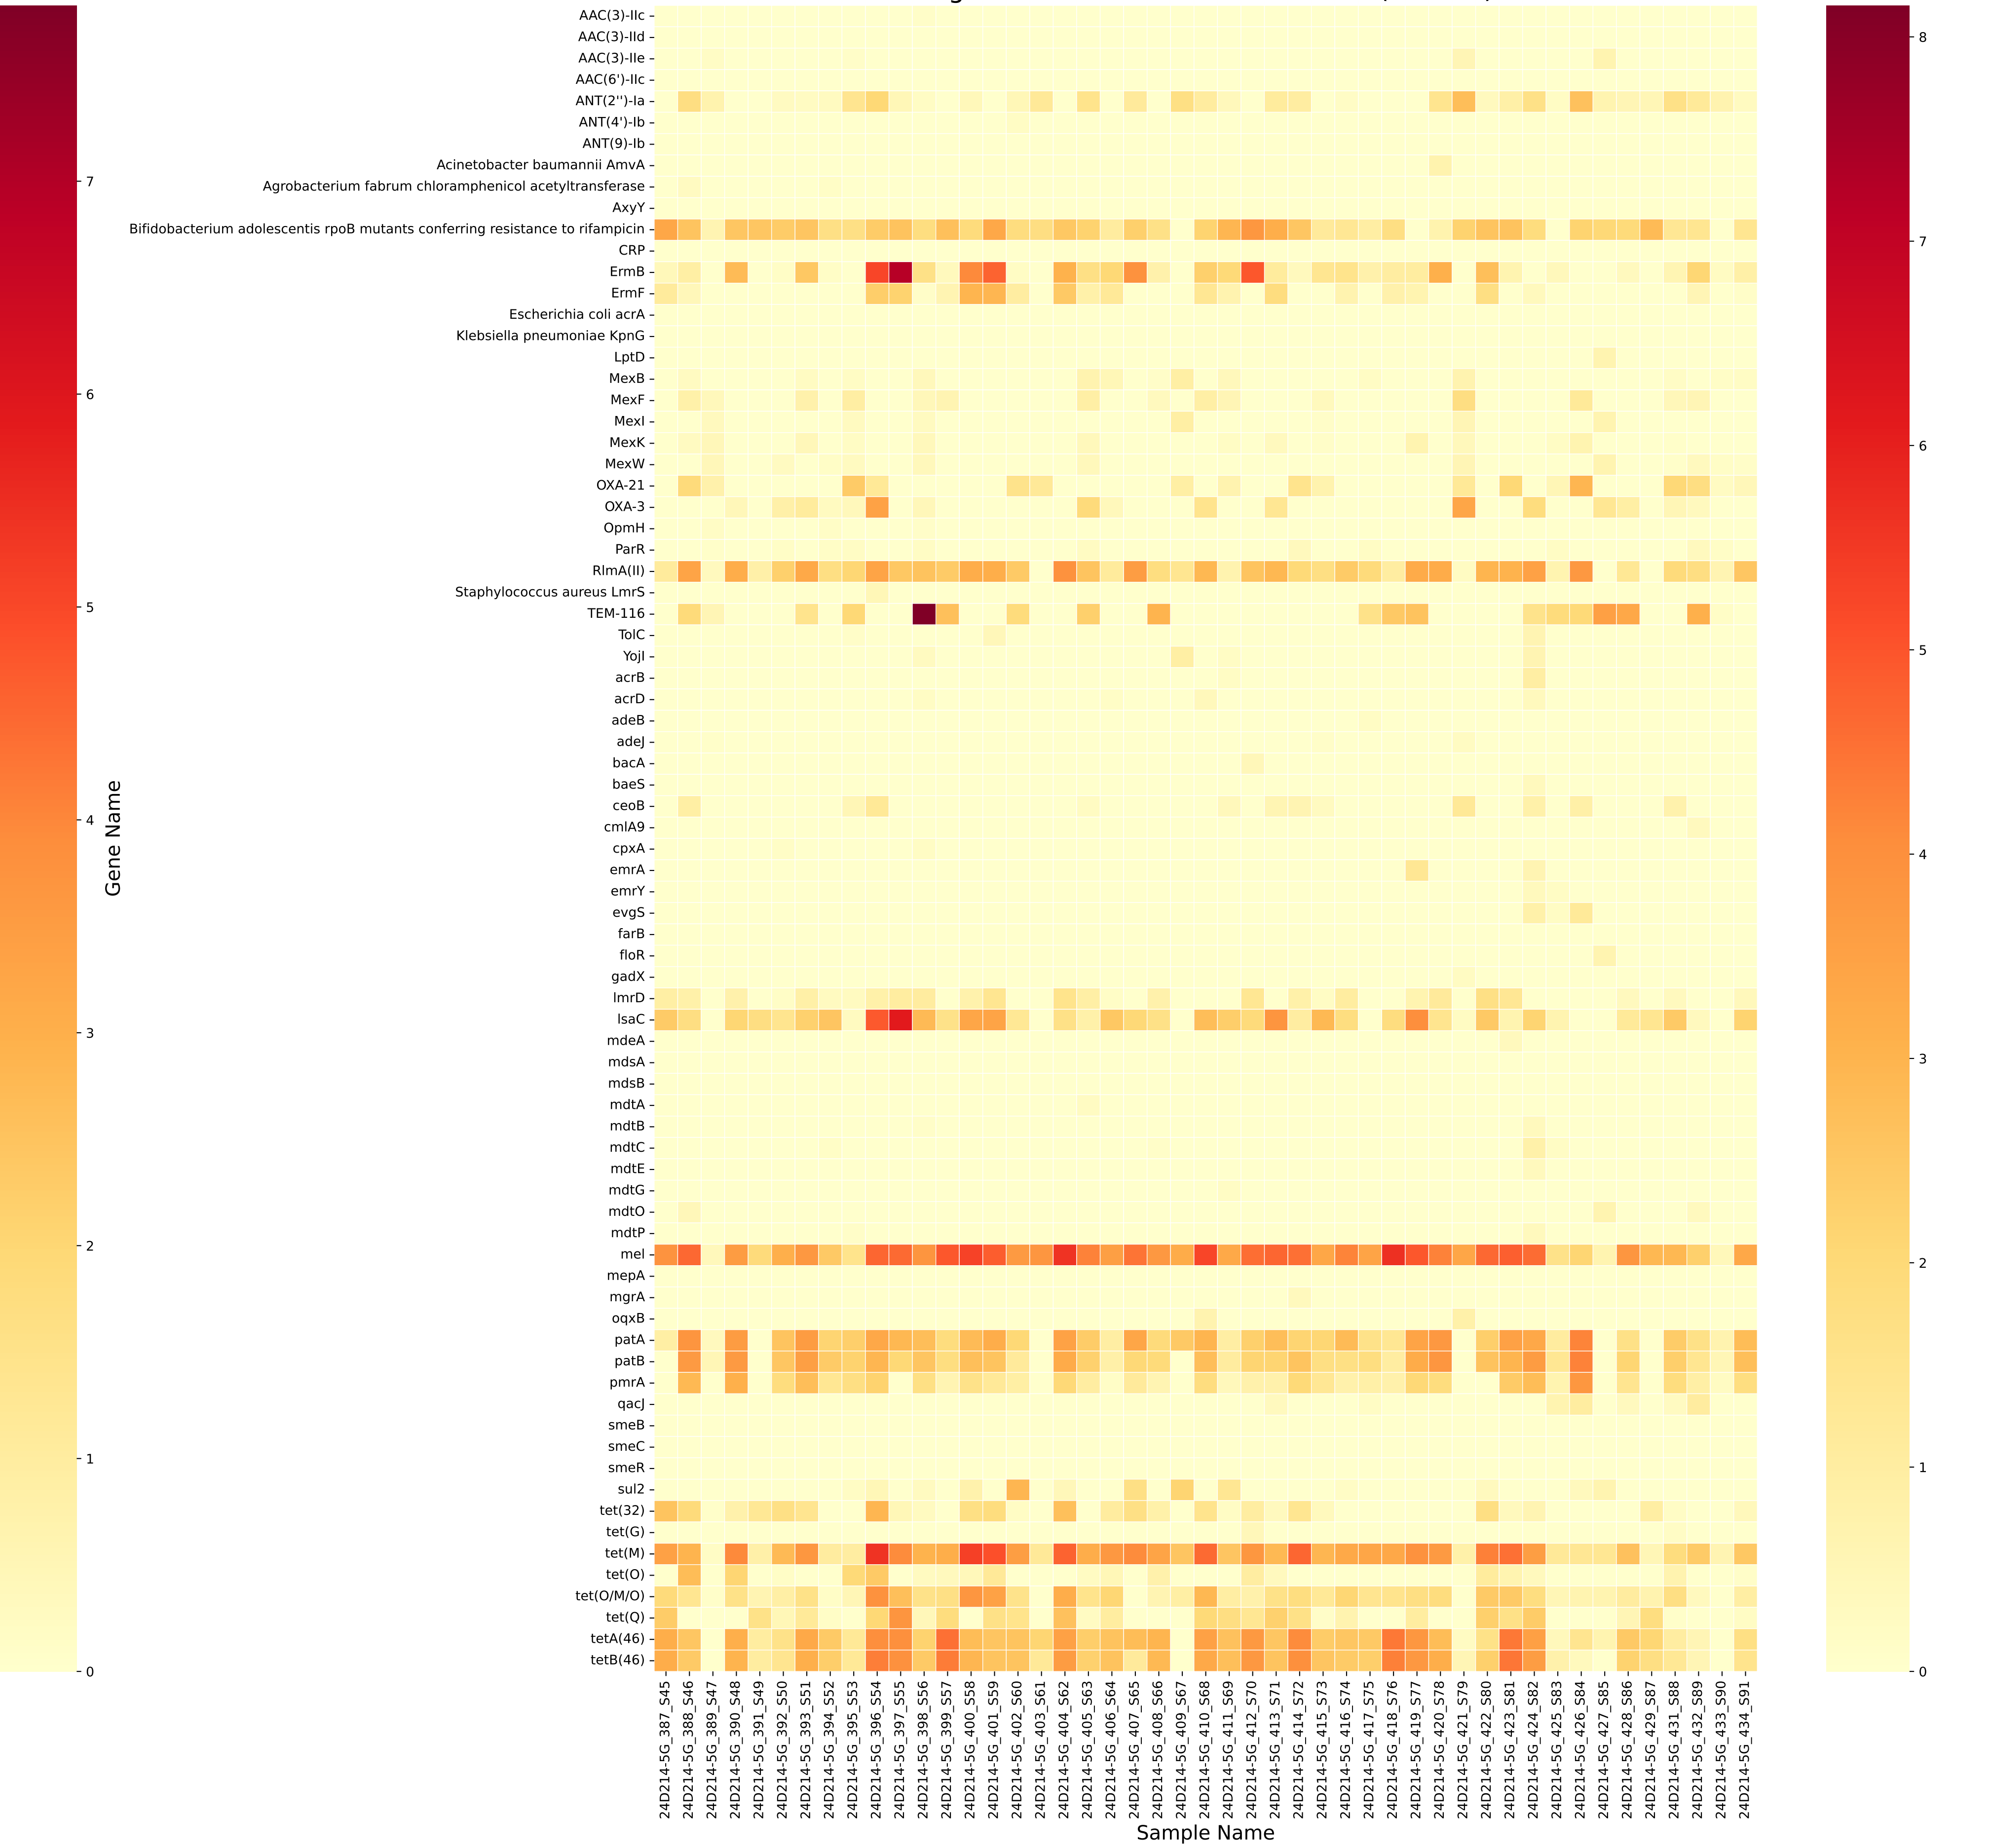





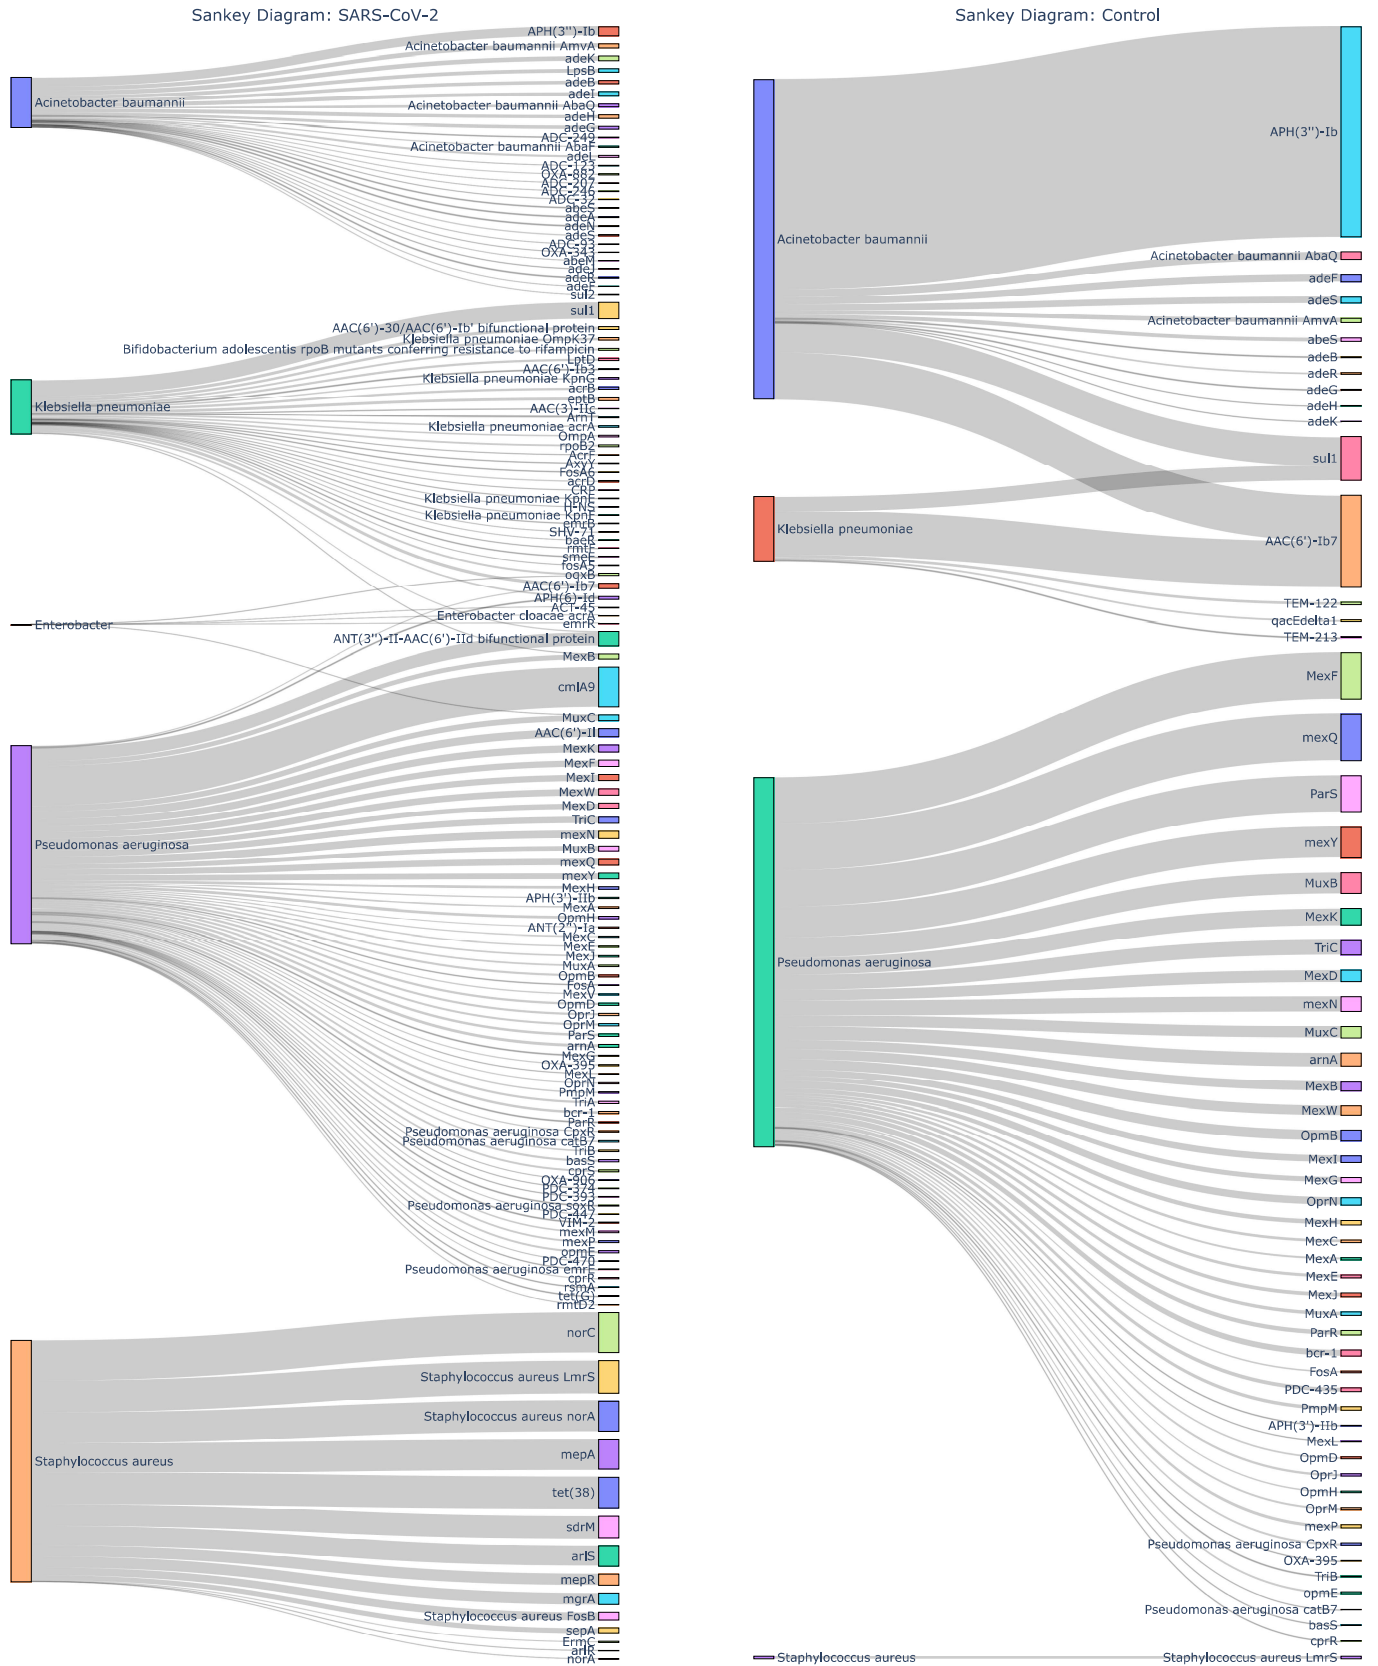

# Volcano Plot of AMR Gene Abundance Changes in SARS-CoV-2 vs Control (Mann-Whitney U Test)

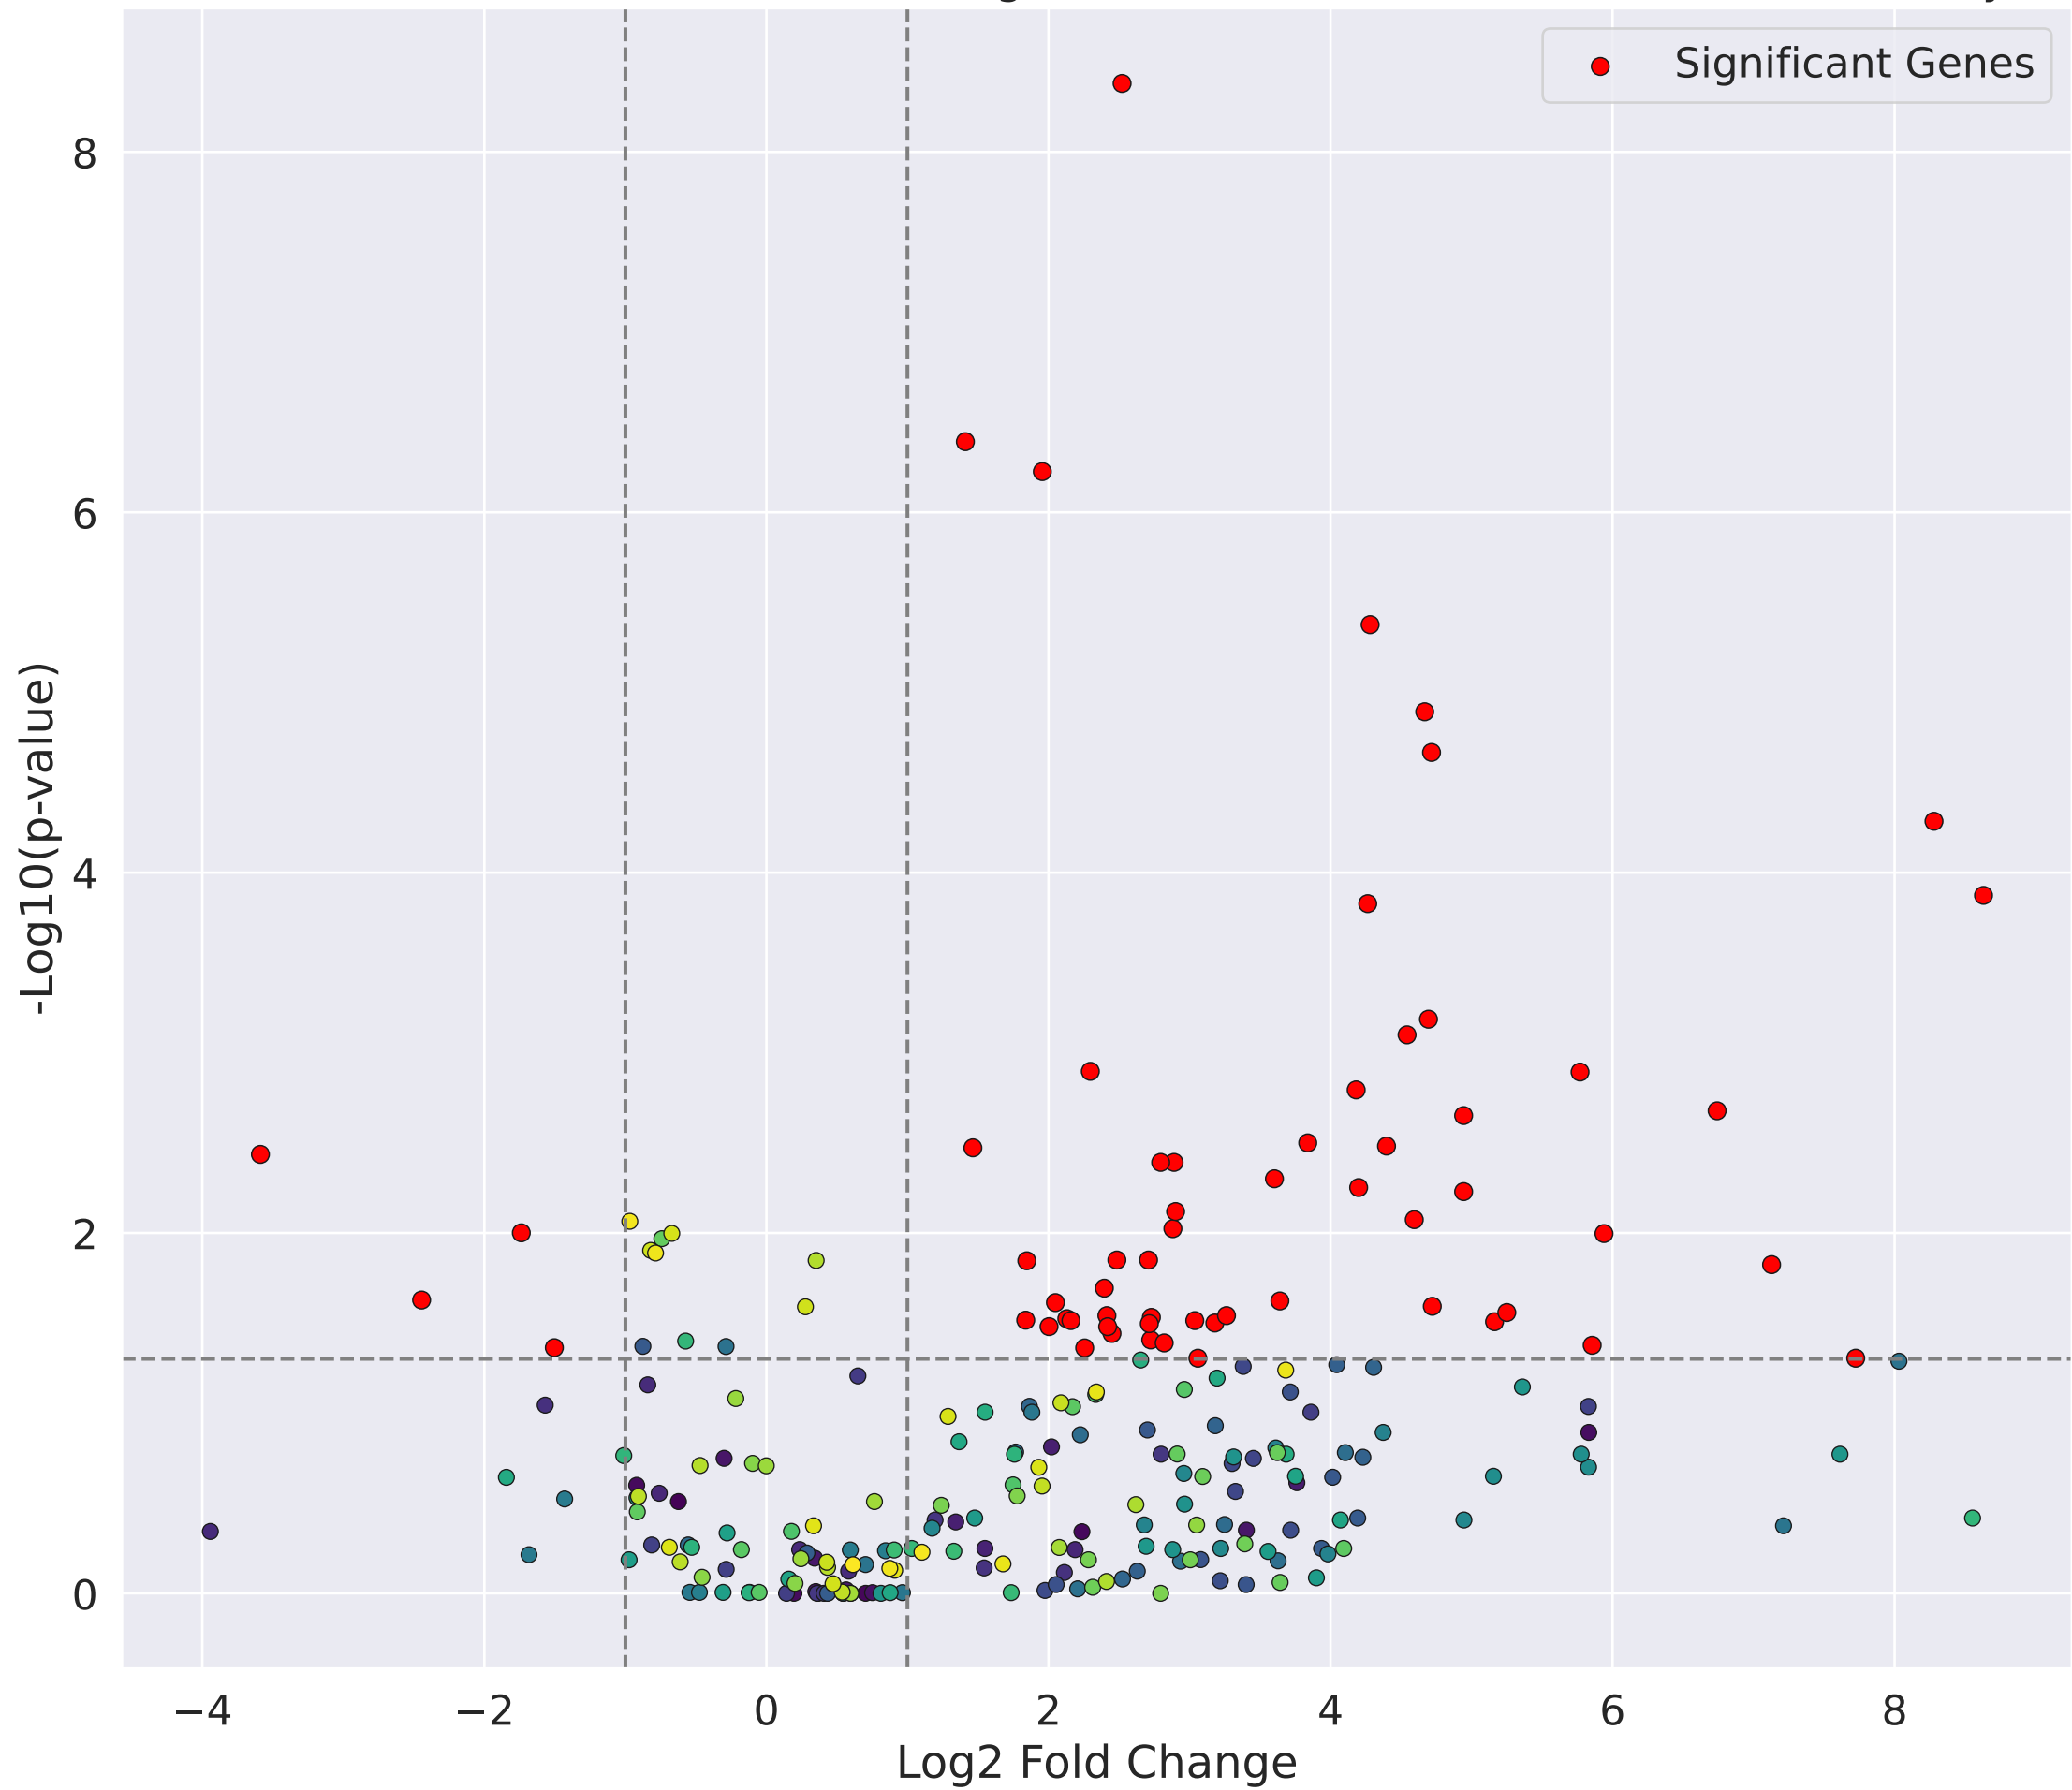

Cumulative Histogram (Control)

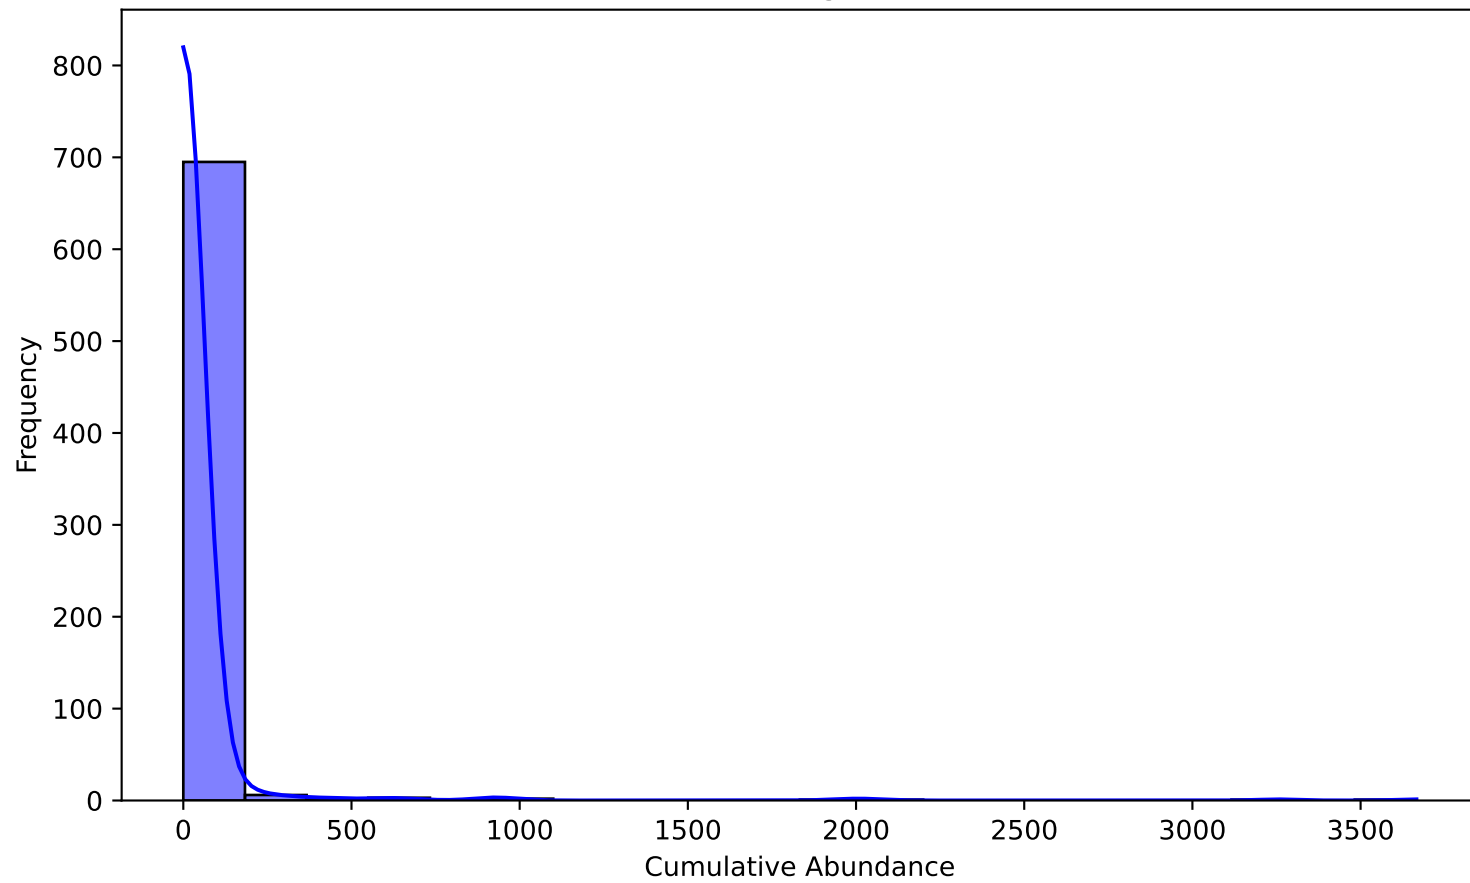

Q-Q Plot (Control)

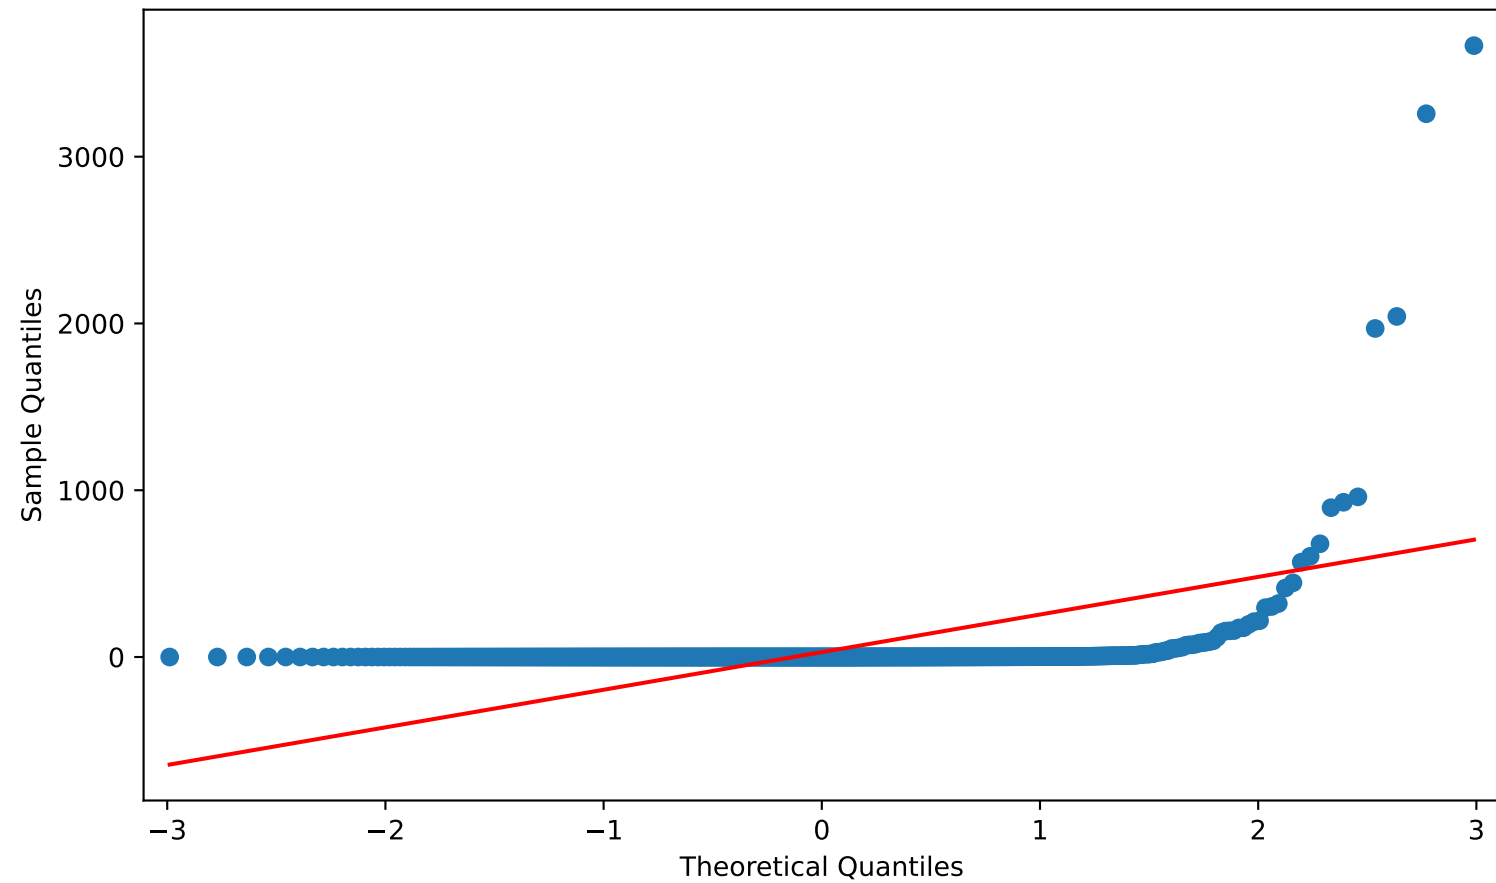

Cumulative Histogram (SARS-CoV-2)

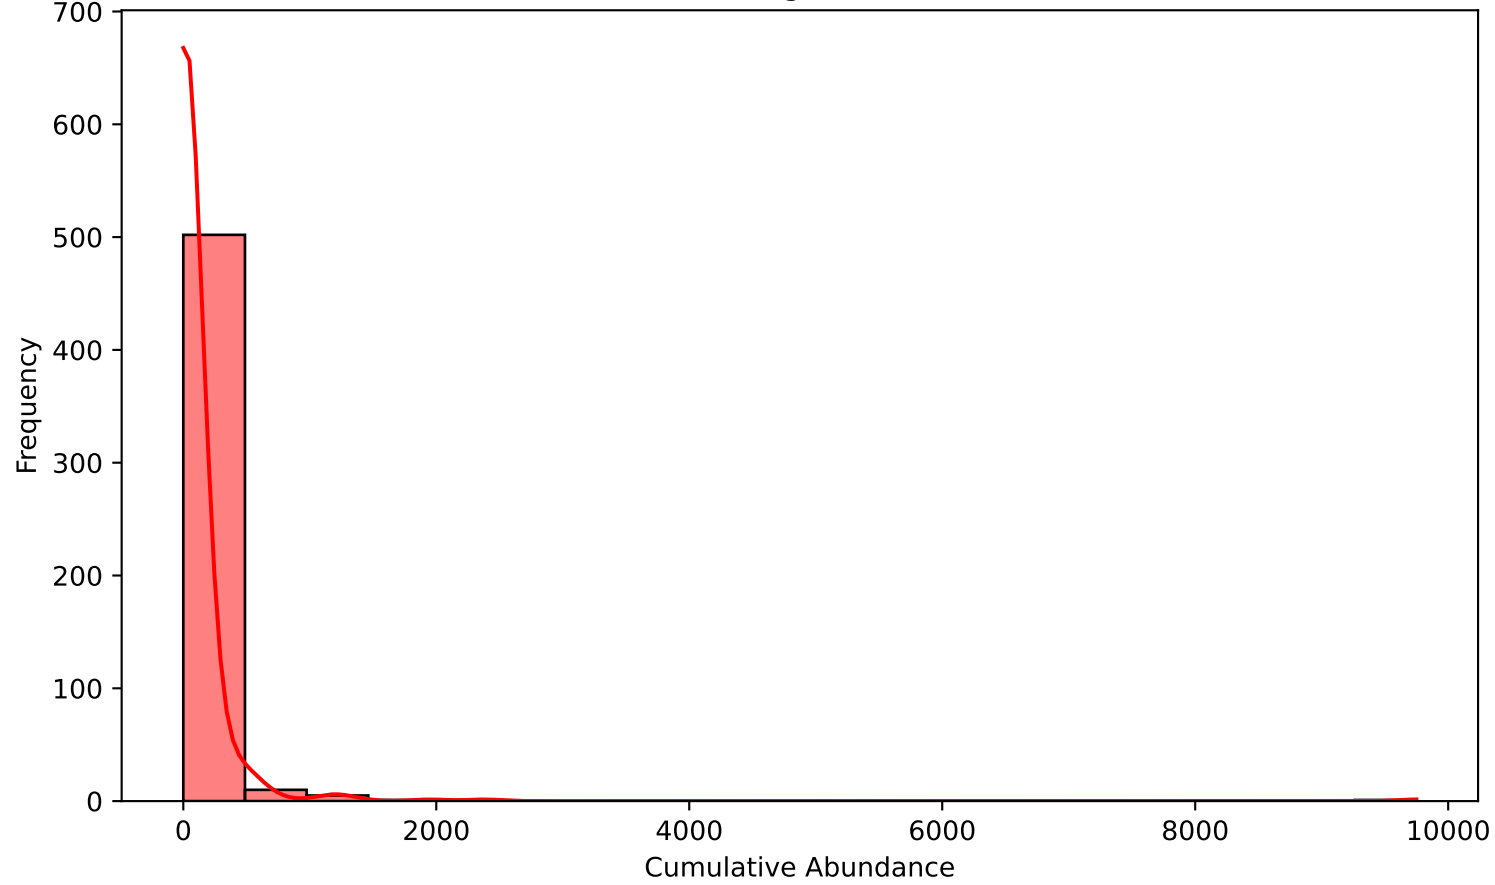

Q-Q Plot (SARS-CoV-2)

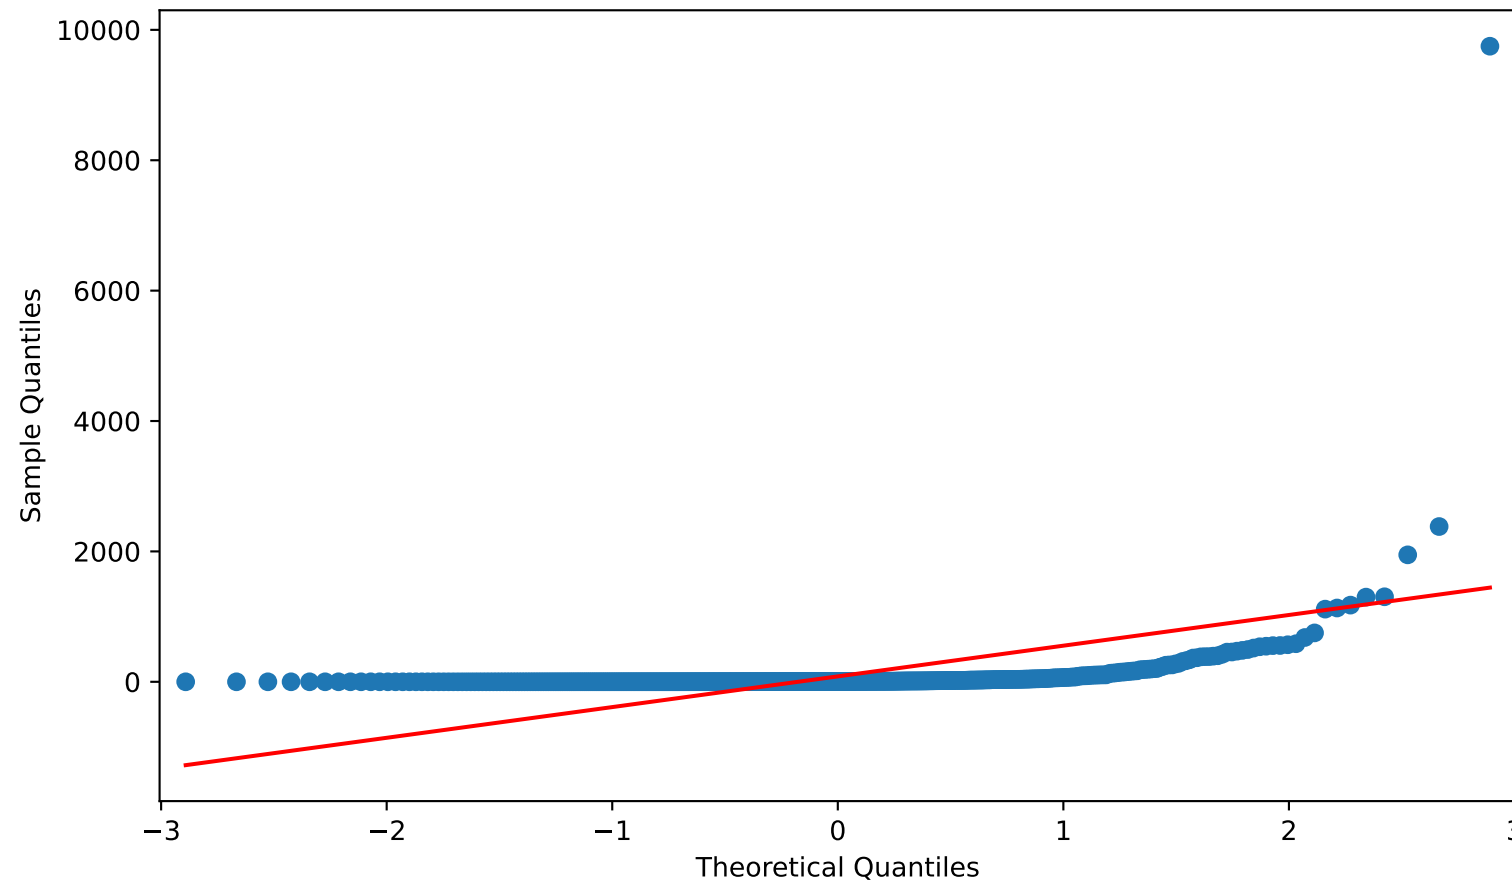

Beta\_Collection\_Location

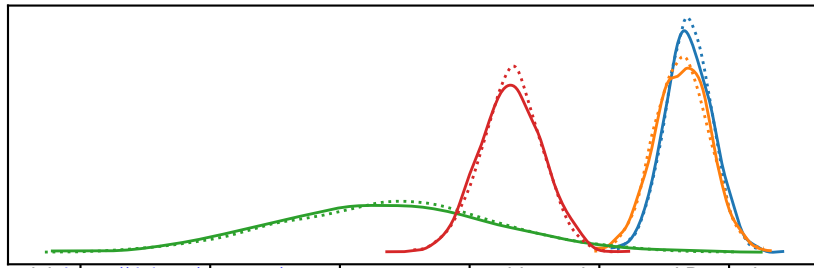

Beta\_Collection\_Location

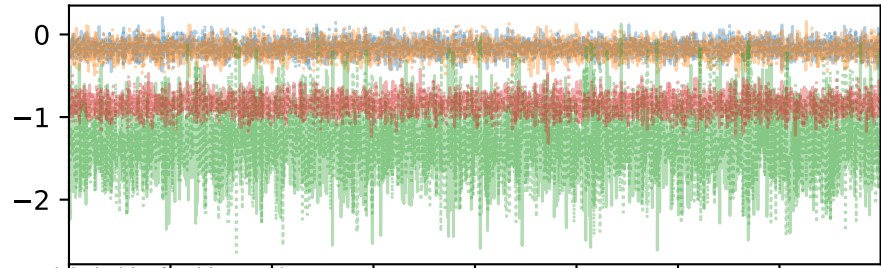

medRxiv preprint doi: <https://doi.org/10.1101/2024.11.14.24317312>; this version posted December 5, 2024. The copyright holder for this preprint (which was not certified by peer review) is the author/funder, who has granted medRxiv a license to display the preprint in perpetuity. It is made available under a [CC-BY-NC-ND 4.0 International license](https://creativecommons.org/licenses/by-nc-nd/4.0/).

Beta\_Host\_Age

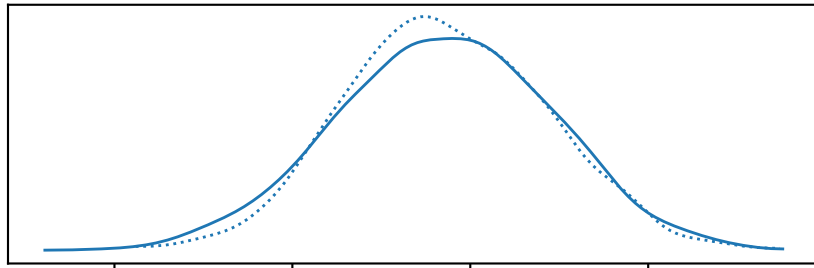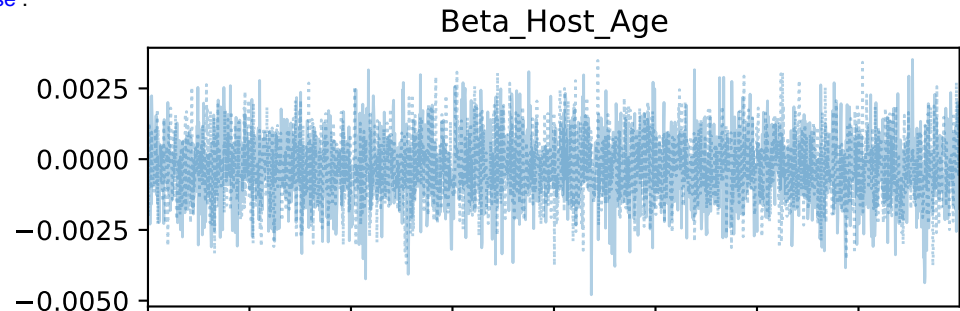

Beta\_Host\_Sex

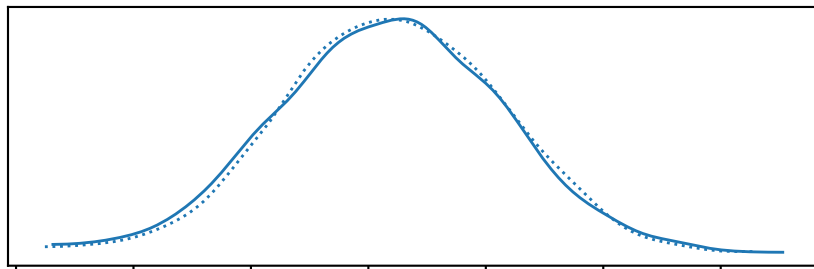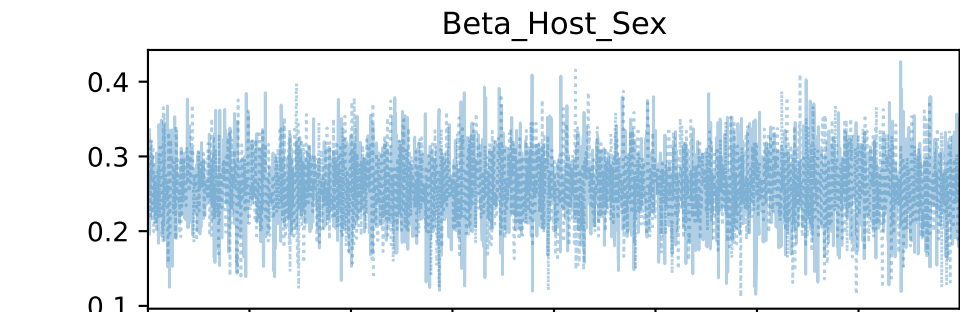

Beta\_Sample\_Type

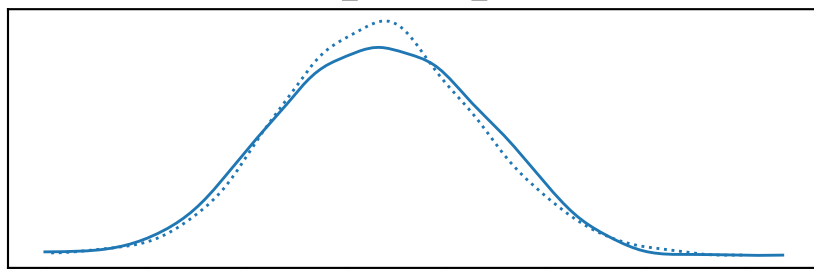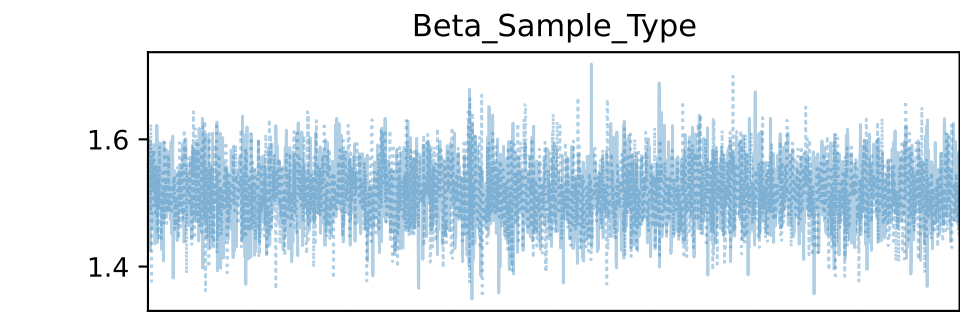

Intercept

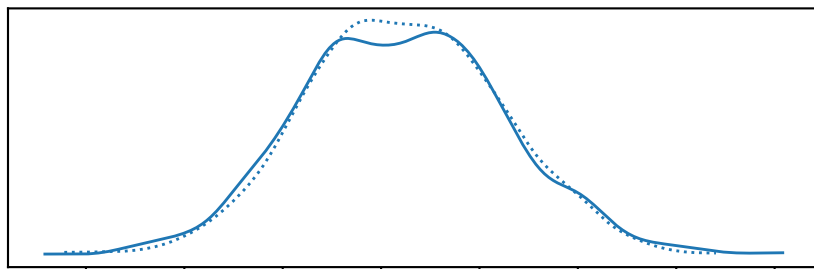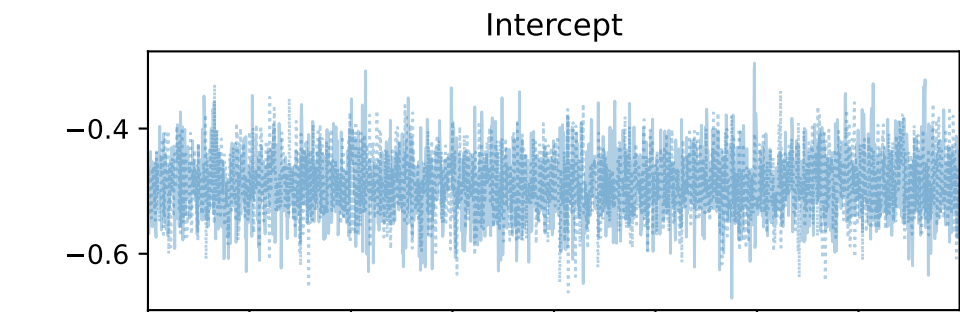

Sigma

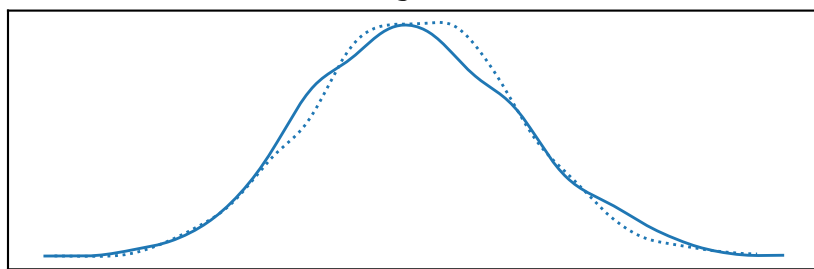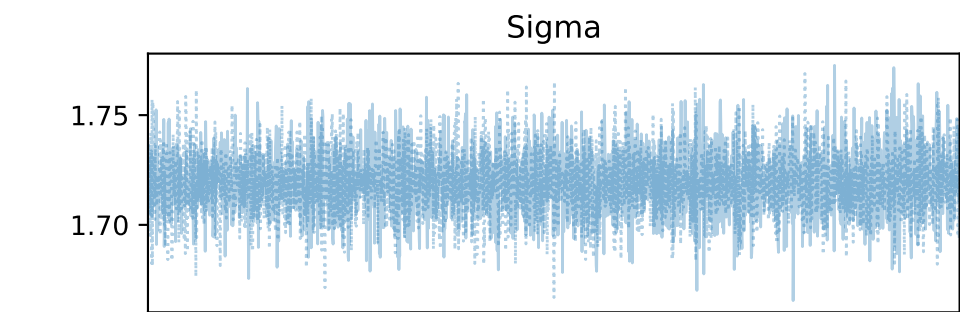

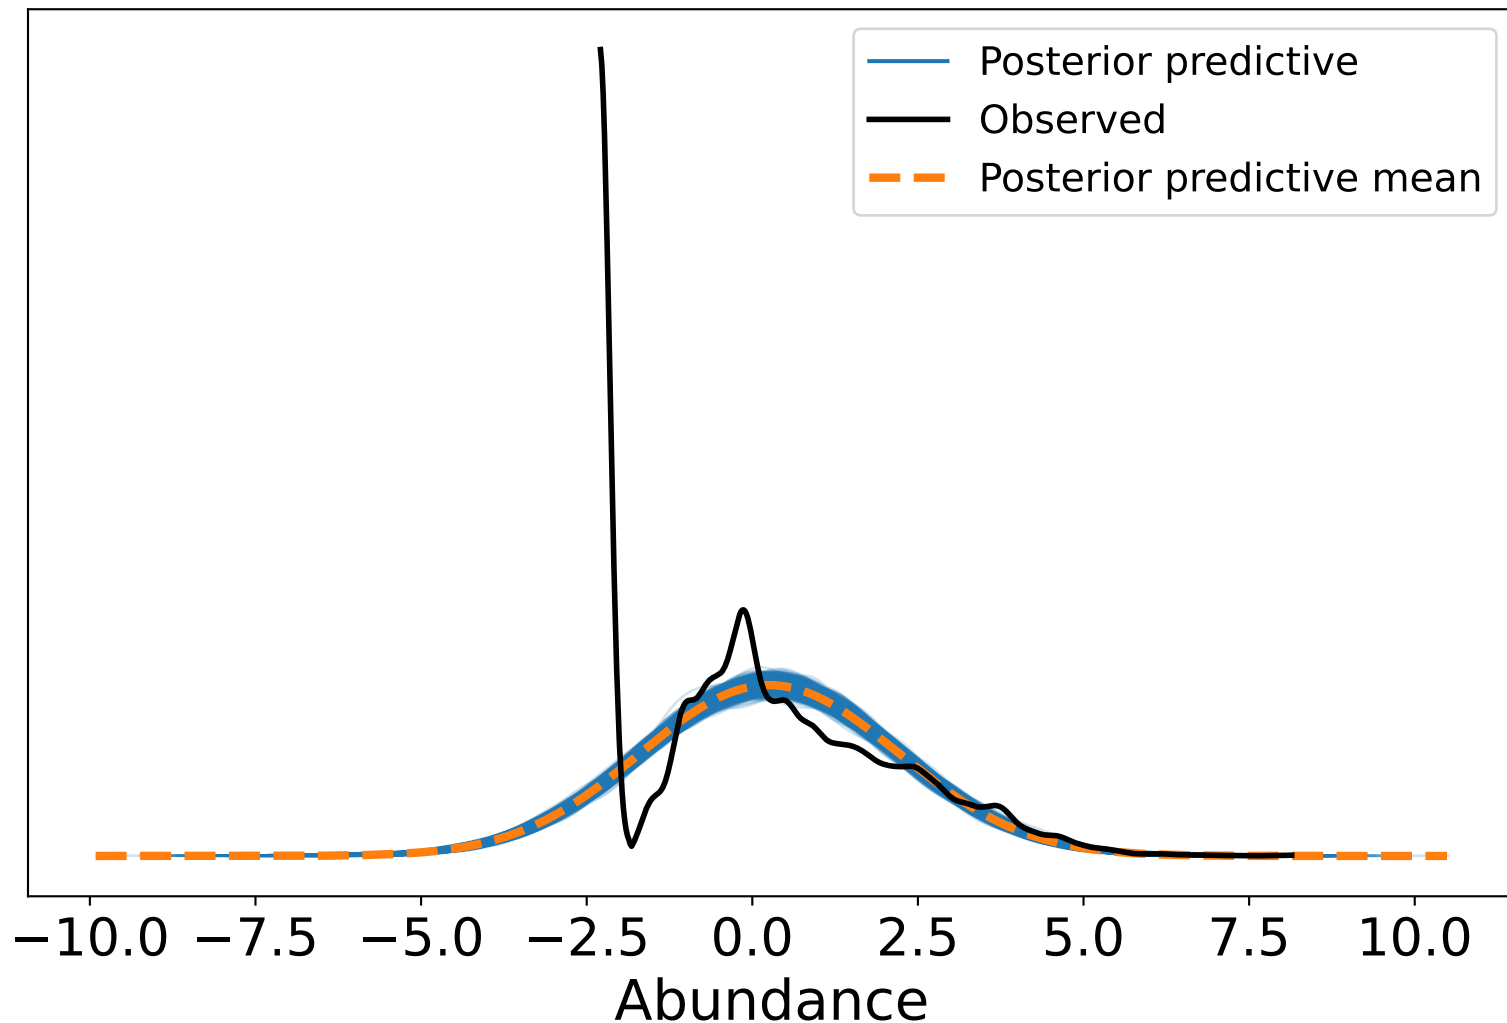

Source: https://medrxiv.org/content/10.1101/2024.11.14.24317312v3.full.pdf
